# Supplementary material
Source: PubMed Central journal article supplement (PMC1993896)
Supplement: NIHMS21400-supplement-SI.pdf [file NIHMS21400-supplement-SI.pdf]

## Captions for Supporting Information Figures

Figure S1. ORTEP diagram of molecule 1 of [Fe(OEP)(CS)(Py)] displaying the atom labeling scheme. Thermal ellipsoids of all atoms are contoured at the 50% probability level.

Figure S2. ORTEP diagram of molecule 3 of [Fe(OEP)(CS)(Py<sub>3</sub>)] displaying the atom labeling scheme. Thermal ellipsoids of all atoms are contoured at the 50% probability level.

Figure S3. ORTEP diagram of [Fe(OEP)(CS)(CH<sub>3</sub>OH)] displaying the atom labeling scheme. Thermal ellipsoids of all atoms are contoured at the 50% probability level.

Figure S4. Formal diagrams of the porphinato core displaying the perpendicular displacements, in units of 0.01Å, of the core atoms from the 24-atom mean plane of [Fe(OEP)(CS)(Py)] (molecule 1). Positive displacements are towards the CS ligand.

Figure S5. Formal diagrams of the porphinato core displaying the perpendicular displacements, in units of 0.01Å, of the core atoms from the 24-atom mean plane of [Fe(OEP)(CS)(Py)] (molecule 2). Positive displacements are towards the CS ligand.

Figure S6. Formal diagrams of the porphinato core displaying the perpendicular displacements, in units of 0.01Å, of the core atoms from the 24-atom mean plane of [Fe(OEP)(CS)(Py)] (molecule 3). Centrosymmetrically related atoms in the diagram have equal magnitude displacements but are of opposite sign.

Figure S7. Formal diagrams of the porphinato core displaying the perpendicular displacements, in units of 0.01Å, of the core atoms from the 24-atom mean plane of [Fe(OEP)(CS)(CH<sub>3</sub>OH)]. Centrosymmetrically related atoms in the diagram have equal magnitude displacements but are of opposite sign.

## Supporting Information Tables

Table S1. Complete Crystallographic Details for [Fe(OEP)(CS)(1-MeIm)].

Table S2. Atomic Coordinates and Equivalent Isotropic Displacement Parameters for  
[Fe(OEP)(CS)(1-MeIm)]

Table S3. Bond Lengths for [Fe(OEP)(CS)(1-MeIm)].

Table S4. Bond Angles for [Fe(OEP)(CS)(1-MeIm)].

Table S5. Anisotropic Displacement Parameters for [Fe(OEP)(CS)(1-MeIm)].

Table S6. Hydrogen Coordinates and Isotropic Displacement Parameters for [Fe(OEP)-  
(CS)(1-MeIm)].

Table S7. Complete Crystallographic Details for [Fe(OEP)(CS)(CH<sub>3</sub>OH)].

Table S8. Atomic Coordinates and Equivalent Isotropic Displacement Parameters for  
[Fe(OEP)(CS)(CH<sub>3</sub>OH)]

Table S9. Bond Lengths for [Fe(OEP)(CS)(CH<sub>3</sub>OH)].

Table S10. Bond Angles for [Fe(OEP)(CS)(CH<sub>3</sub>OH)].

Table S11. Anisotropic Displacement Parameters for [Fe(OEP)(CS)(CH<sub>3</sub>OH)].

Table S12. Hydrogen Coordinates and Isotropic Displacement Parameters for [Fe(OEP)-  
(CS)(CH<sub>3</sub>OH)].

Table S13. Complete Crystallographic Details for [Fe(OEP)(CS)(Py)].

Table S14. Atomic Coordinates and Equivalent Isotropic Displacement Parameters for  
[Fe(OEP)(CS)(Py)].

Table S15. bond Lengths for [Fe(OEP)(CS)(Py)].

Table S16. bond Angles for [Fe(OEP)(CS)(Py)].

Table S17. Anisotropic Isotropic Displacement Parameters for [Fe(OEP)(CS)(Py)].

Table S18. Hydrogen Coordinates and Isotropic Displacement Parameters for [Fe(OEP)(CS)(Py)].

**Table S1.** Crystal data and structure refinement for [Fe(OEP)(CS)(1-MeIm)]

|                                   |                                                                                                 |
|-----------------------------------|-------------------------------------------------------------------------------------------------|
| Empirical formula                 | C <sub>41</sub> H <sub>50</sub> FeN <sub>6</sub> S                                              |
| Formula weight                    | 714.78                                                                                          |
| Crystal system, Space group       | Monoclinic, <i>P2</i> <sub>1</sub> / <i>n</i>                                                   |
| Unit cell dimensions              | a = 9.5906(5) Å    α = 90°<br>b = 16.704(4) Å    β = 100.453(7)°<br>c = 23.1417(6) Å    γ = 90° |
| Volume, Z                         | 3645.9(8) Å <sup>3</sup> , 4                                                                    |
| Density (calculated)              | 1.302 g/cm <sup>3</sup>                                                                         |
| Wavelength                        | 0.71073 Å                                                                                       |
| Absorption coefficient            | 0.509 mm <sup>-1</sup>                                                                          |
| F(000)                            | 1520                                                                                            |
| Crystal size                      | 0.22 x 0.14 x 0.03 mm <sup>3</sup>                                                              |
| Temperature                       | 130(2) K                                                                                        |
| Diffractometer                    | Enraf-Nonius FAST                                                                               |
| Power setting                     | 50kV, 40mA                                                                                      |
| Image time, sec                   | 10                                                                                              |
| Increment, deg                    | 0.15                                                                                            |
| Detector dist. mm                 | 40                                                                                              |
| Detector tilt angle, deg          | -25                                                                                             |
| Theta range for data collection   | 2.17 to 27.00°                                                                                  |
| Index ranges                      | -7 ≤ h ≤ 12, -21 ≤ k ≤ 16, -29 ≤ l ≤ 26                                                         |
| Reflection collected/unique       | 22290/7882 [R(int) = 0.0569]                                                                    |
| Unique observed reflections       | 6057                                                                                            |
| Completeness to theta = 27.00°    | 98.9 %                                                                                          |
| Absorption correction             | DIFABS                                                                                          |
| Max. and min. transmission        | 1.000 and 0.7932                                                                                |
| Refinement method                 | Full-matrix least-squares on F <sup>2</sup>                                                     |
| Data / restraints / parameters    | 7882 / 0 / 442                                                                                  |
| Goodness-of-fit on F <sup>2</sup> | 1.061                                                                                           |
| Final R indices [I > 2σ(I)]       | R1 = 0.0735, wR2 = 0.1742                                                                       |
| R indices (all data)              | R1 = 0.0987, wR2 = 0.1902                                                                       |
| Largest diff. peak and hole       | 0.682 and -0.499 e.Å <sup>-3</sup>                                                              |

**Table S2.** Atomic coordinates ( $\times 10^4$ ) and equivalent isotropic displacement parameters ( $\text{\AA}^2 \times 10^3$ ) for  $[\text{Fe}(\text{OEP})(\text{CS})(1\text{-MeIm})]^a$

| Atom  | x        | y        | z        | U(eq) |
|-------|----------|----------|----------|-------|
| Fe(1) | 9446(1)  | 1116(1)  | 7745(1)  | 9(1)  |
| C(1)  | 10433(3) | 265(2)   | 7869(1)  | 12(1) |
| S(1)  | 11494(1) | -454(1)  | 7946(1)  | 22(1) |
| N(1)  | 10973(3) | 1687(2)  | 8297(1)  | 11(1) |
| N(2)  | 10434(3) | 1356(2)  | 7077(1)  | 11(1) |
| N(3)  | 7867(3)  | 592(2)   | 7191(1)  | 10(1) |
| N(4)  | 8342(3)  | 988(2)   | 8398(1)  | 11(1) |
| C(a1) | 11104(3) | 1747(2)  | 8896(2)  | 13(1) |
| C(a2) | 12206(3) | 2002(2)  | 8169(2)  | 13(1) |
| C(a3) | 11659(3) | 1791(2)  | 7099(2)  | 12(1) |
| C(a4) | 10043(3) | 1112(2)  | 6506(2)  | 12(1) |
| C(a5) | 7822(3)  | 419(2)   | 6609(1)  | 12(1) |
| C(a6) | 6590(3)  | 337(2)   | 7311(2)  | 11(1) |
| C(a7) | 6980(3)  | 717(2)   | 8353(2)  | 13(1) |
| C(a8) | 8774(4)  | 1187(2)  | 8976(2)  | 15(1) |
| C(b1) | 12448(4) | 2097(2)  | 9152(2)  | 15(1) |
| C(b2) | 13137(3) | 2260(2)  | 8700(2)  | 15(1) |
| C(b3) | 11996(4) | 1865(2)  | 6516(2)  | 14(1) |
| C(b4) | 11010(4) | 1429(2)  | 6151(2)  | 14(1) |
| C(b5) | 6505(4)  | 26(2)    | 6360(2)  | 13(1) |
| C(b6) | 5729(3)  | -17(2)   | 6799(2)  | 13(1) |
| C(b7) | 6527(4)  | 751(2)   | 8920(2)  | 14(1) |
| C(b8) | 7648(4)  | 1047(2)  | 9308(2)  | 15(1) |
| C(m1) | 12500(4) | 2073(2)  | 7609(2)  | 15(1) |
| C(m2) | 8847(4)  | 655(2)   | 6291(2)  | 13(1) |
| C(m3) | 6161(3)  | 428(2)   | 7844(2)  | 13(1) |
| C(m4) | 10077(4) | 1512(2)  | 9210(2)  | 16(1) |
| C(11) | 12943(4) | 2242(3)  | 9800(2)  | 22(1) |
| C(12) | 12224(5) | 2963(3)  | 10032(2) | 34(1) |
| C(21) | 14570(4) | 2635(2)  | 8730(2)  | 19(1) |
| C(22) | 14522(4) | 3538(3)  | 8692(2)  | 33(1) |
| C(31) | 13208(4) | 2339(2)  | 6361(2)  | 18(1) |
| C(32) | 14533(4) | 1852(3)  | 6350(2)  | 32(1) |
| C(41) | 10920(4) | 1274(2)  | 5507(2)  | 17(1) |
| C(42) | 11569(4) | 475(3)   | 5384(2)  | 24(1) |
| C(51) | 6051(4)  | -243(2)  | 5736(2)  | 18(1) |
| C(52) | 6306(5)  | -1131(3) | 5644(2)  | 31(1) |

**Table S2.** Continued...

| Atom  | x       | y        | z        | $U_{eq}$ |
|-------|---------|----------|----------|----------|
| C(61) | 4283(4) | -353(2)  | 6787(2)  | 17(1)    |
| C(62) | 4299(4) | -1151(2) | 7110(2)  | 23(1)    |
| C(71) | 5109(4) | 474(2)   | 9026(2)  | 19(1)    |
| C(72) | 5032(4) | -430(3)  | 9095(2)  | 30(1)    |
| C(81) | 7756(4) | 1206(3)  | 9950(2)  | 25(1)    |
| C(82) | 8490(5) | 539(3)   | 10342(2) | 40(1)    |
| N(5)  | 8325(3) | 2198(2)  | 7541(1)  | 12(1)    |
| C(91) | 7598(4) | 2649(2)  | 7887(2)  | 19(1)    |
| C(92) | 6948(4) | 3272(2)  | 7574(2)  | 20(1)    |
| N(6)  | 7268(3) | 3205(2)  | 7023(1)  | 16(1)    |
| C(93) | 6745(4) | 3716(2)  | 6520(2)  | 23(1)    |
| C(94) | 8098(3) | 2557(2)  | 7025(2)  | 14(1)    |

<sup>a</sup>  $U_{eq}$  is defined as one third of the trace of the orthogonalized  $U_{ij}$  tensor. The estimated standard deviations of the least significant digits are given in parentheses.

**Table S3.** Bond lengths for [Fe(OEP)(CS)(1-MeIm)]<sup>a</sup>.

| bond         | length Å | bond         | length Å |
|--------------|----------|--------------|----------|
| Fe(1)–C(1)   | 1.703(4) | C(b3)–C(b4)  | 1.360(5) |
| Fe(1)–N(2)   | 1.996(3) | C(b3)–C(31)  | 1.502(5) |
| Fe(1)–N(3)   | 2.000(3) | C(b4)–C(41)  | 1.498(5) |
| Fe(1)–N(1)   | 2.002(3) | C(b5)–C(b6)  | 1.366(5) |
| Fe(1)–N(4)   | 2.006(3) | C(b5)–C(51)  | 1.500(5) |
| Fe(1)–N(5)   | 2.112(3) | C(b6)–C(61)  | 1.491(5) |
| C(1)–S(1)    | 1.563(4) | C(b7)–C(b8)  | 1.363(5) |
| N(1)–C(a1)   | 1.372(4) | C(b7)–C(71)  | 1.499(5) |
| N(1)–C(a2)   | 1.375(4) | C(b8)–C(81)  | 1.493(5) |
| N(2)–C(a4)   | 1.368(4) | C(m1)–H(m1)  | 0.9500   |
| N(2)–C(a3)   | 1.374(4) | C(m2)–H(m2)  | 0.9500   |
| N(3)–C(a5)   | 1.370(4) | C(m3)–H(m3)  | 0.9500   |
| N(3)–C(a6)   | 1.373(4) | C(m4)–H(m4)  | 0.9500   |
| N(4)–C(a7)   | 1.369(4) | C(11)–C(12)  | 1.532(6) |
| N(4)–C(a8)   | 1.369(5) | C(11)–H(11a) | 0.9900   |
| C(a1)–C(m4)  | 1.383(5) | C(11)–H(11b) | 0.9900   |
| C(a1)–C(b1)  | 1.442(5) | C(12)–H(12a) | 0.9800   |
| C(a2)–C(m1)  | 1.380(5) | C(12)–H(12b) | 0.9800   |
| C(a2)–C(b2)  | 1.448(5) | C(12)–H(12c) | 0.9800   |
| C(a3)–C(m1)  | 1.386(5) | C(21)–C(22)  | 1.511(6) |
| C(a3)–C(b3)  | 1.450(4) | C(21)–H(21a) | 0.9900   |
| C(a4)–C(m2)  | 1.393(5) | C(21)–H(21b) | 0.9900   |
| C(a4)–C(b4)  | 1.446(4) | C(22)–H(22a) | 0.9800   |
| C(a5)–C(m2)  | 1.387(5) | C(22)–H(22b) | 0.9800   |
| C(a5)–C(b5)  | 1.448(5) | C(22)–H(22c) | 0.9800   |
| C(a6)–C(m3)  | 1.377(5) | C(31)–C(32)  | 1.513(5) |
| C(a6)–C(b6)  | 1.443(5) | C(31)–H(31a) | 0.9900   |
| C(a7)–C(m3)  | 1.379(5) | C(31)–H(31b) | 0.9900   |
| C(a7)–C(b7)  | 1.455(5) | C(32)–H(32a) | 0.9800   |
| C(a8)–C(m4)  | 1.379(5) | C(32)–H(32b) | 0.9800   |
| C(a8)–C(b8)  | 1.454(5) | C(32)–H(32c) | 0.9800   |
| C(b1)–C(b2)  | 1.363(5) | C(41)–C(42)  | 1.522(5) |
| C(b1)–C(11)  | 1.508(5) | C(41)–H(41a) | 0.9900   |
| C(b2)–C(21)  | 1.501(5) | C(41)–H(41b) | 0.9900   |
| C(42)–H(42a) | 0.9800   | C(72)–H(72c) | 0.9800   |
| C(42)–H(42b) | 0.9800   | C(81)–C(82)  | 1.525(6) |
| C(42)–H(42c) | 0.9800   | C(81)–H(81a) | 0.9900   |

**Table S3.** Continued...

| bond         | length Å | bond         | length Å |
|--------------|----------|--------------|----------|
| C(51)–C(52)  | 1.525(6) | C(81)–H(81b) | 0.9900   |
| C(51)–H(51a) | 0.9900   | C(82)–H(82a) | 0.9800   |
| C(51)–H(51b) | 0.9900   | C(82)–H(82b) | 0.9800   |
| C(52)–H(52a) | 0.9800   | C(82)–H(82c) | 0.9800   |
| C(52)–H(52b) | 0.9800   | N(5)–C(94)   | 1.319(5) |
| C(52)–H(52c) | 0.9800   | N(5)–C(91)   | 1.379(4) |
| C(61)–C(62)  | 1.528(5) | C(91)–C(92)  | 1.354(5) |
| C(61)–H(61a) | 0.9900   | C(91)–H(91)  | 0.9500   |
| C(61)–H(61b) | 0.9900   | C(92)–N(6)   | 1.368(5) |
| C(62)–H(62a) | 0.9800   | C(92)–H(92)  | 0.9500   |
| C(62)–H(62b) | 0.9800   | N(6)–C(94)   | 1.343(5) |
| C(62)–H(62c) | 0.9800   | N(6)–C(93)   | 1.457(5) |
| C(71)–C(72)  | 1.521(6) | C(93)–H(93a) | 0.9800   |
| C(71)–H(71a) | 0.9900   | C(93)–H(93b) | 0.9800   |
| C(71)–H(71b) | 0.9900   | C(93)–H(93c) | 0.9800   |
| C(72)–H(72a) | 0.9800   | C(94)–H(94)  | 0.9500   |
| C(72)–H(72b) | 0.9800   |              |          |

<sup>a</sup> The estimated standard deviations of the least significant digits are given in parentheses.

**Table S4.** Bond angles for [Fe(OEP)(CS)(1-MeIm)]<sup>a</sup>.

| angle             | degree     | angle             | degree     |
|-------------------|------------|-------------------|------------|
| C(1)–Fe(1)–N(2)   | 88.33(13)  | C(1)–Fe(1)–N(3)   | 94.34(14)  |
| N(2)–Fe(1)–N(3)   | 90.05(11)  | C(1)–Fe(1)–N(1)   | 88.35(14)  |
| N(2)–Fe(1)–N(1)   | 90.19(11)  | N(3)–Fe(1)–N(1)   | 177.30(12) |
| C(1)–Fe(1)–N(4)   | 97.90(13)  | N(2)–Fe(1)–N(4)   | 173.77(12) |
| N(3)–Fe(1)–N(4)   | 89.70(11)  | N(1)–Fe(1)–N(4)   | 89.77(11)  |
| C(1)–Fe(1)–N(5)   | 175.32(13) | N(2)–Fe(1)–N(5)   | 87.02(11)  |
| N(3)–Fe(1)–N(5)   | 86.26(11)  | N(1)–Fe(1)–N(5)   | 91.07(11)  |
| N(4)–Fe(1)–N(5)   | 86.74(11)  | S(1)–C(1)–Fe(1)   | 172.2(2)   |
| C(a1)–N(1)–C(a2)  | 105.4(3)   | C(a1)–N(1)–Fe(1)  | 126.9(2)   |
| C(a2)–N(1)–Fe(1)  | 127.1(2)   | C(a4)–N(2)–C(a3)  | 106.1(3)   |
| C(a4)–N(2)–Fe(1)  | 127.1(2)   | C(a3)–N(2)–Fe(1)  | 126.9(2)   |
| C(a5)–N(3)–C(a6)  | 105.3(3)   | C(a5)–N(3)–Fe(1)  | 127.5(2)   |
| C(a6)–N(3)–Fe(1)  | 127.2(2)   | C(a7)–N(4)–C(a8)  | 105.6(3)   |
| C(a7)–N(4)–Fe(1)  | 127.3(2)   | C(a8)–N(4)–Fe(1)  | 127.0(2)   |
| N(1)–C(a1)–C(m4)  | 124.6(3)   | N(1)–C(a1)–C(b1)  | 110.9(3)   |
| C(m4)–C(a1)–C(b1) | 124.6(3)   | N(1)–C(a2)–C(m1)  | 124.5(3)   |
| N(1)–C(a2)–C(b2)  | 110.6(3)   | C(m1)–C(a2)–C(b2) | 124.9(3)   |
| N(2)–C(a3)–C(m1)  | 125.0(3)   | N(2)–C(a3)–C(b3)  | 110.1(3)   |
| C(m1)–C(a3)–C(b3) | 124.8(3)   | N(2)–C(a4)–C(m2)  | 124.9(3)   |
| N(2)–C(a4)–C(b4)  | 110.4(3)   | C(m2)–C(a4)–C(b4) | 124.7(3)   |
| N(3)–C(a5)–C(m2)  | 124.2(3)   | N(3)–C(a5)–C(b5)  | 110.9(3)   |
| C(m2)–C(a5)–C(b5) | 124.7(3)   | N(3)–C(a6)–C(m3)  | 124.8(3)   |
| N(3)–C(a6)–C(b6)  | 111.0(3)   | C(m3)–C(a6)–C(b6) | 124.1(3)   |
| N(4)–C(a7)–C(m3)  | 124.6(3)   | N(4)–C(a7)–C(b7)  | 110.9(3)   |
| C(m3)–C(a7)–C(b7) | 124.5(3)   | N(4)–C(a8)–C(m4)  | 124.9(3)   |
| N(4)–C(a8)–C(b8)  | 110.8(3)   | C(m4)–C(a8)–C(b8) | 124.2(3)   |
| C(b2)–C(b1)–C(a1) | 106.7(3)   | C(b2)–C(b1)–C(11) | 128.5(3)   |
| C(a1)–C(b1)–C(11) | 124.8(3)   | C(b1)–C(b2)–C(a2) | 106.4(3)   |
| C(b1)–C(b2)–C(21) | 128.0(3)   | C(a2)–C(b2)–C(21) | 125.6(3)   |
| C(b4)–C(b3)–C(a3) | 106.6(3)   | C(b4)–C(b3)–C(31) | 128.0(3)   |
| C(a3)–C(b3)–C(31) | 125.4(3)   | C(b3)–C(b4)–C(a4) | 106.7(3)   |
| C(b3)–C(b4)–C(41) | 128.1(3)   | C(a4)–C(b4)–C(41) | 125.1(3)   |
| C(b6)–C(b5)–C(a5) | 106.4(3)   | C(b6)–C(b5)–C(51) | 126.8(3)   |
| C(a5)–C(b5)–C(51) | 126.8(3)   | C(b5)–C(b6)–C(a6) | 106.4(3)   |
| C(b5)–C(b6)–C(61) | 129.5(3)   | C(a6)–C(b6)–C(61) | 124.2(3)   |
| C(b8)–C(b7)–C(a7) | 106.3(3)   | C(b8)–C(b7)–C(71) | 129.4(3)   |
| C(a7)–C(b7)–C(71) | 124.3(3)   | C(b7)–C(b8)–C(a8) | 106.4(3)   |



**Table S4.** Continued...

| angle               | degree   | angle               | degree   |
|---------------------|----------|---------------------|----------|
| C(b7)–C(b8)–C(81)   | 128.6(3) | C(a8)–C(b8)–C(81)   | 125.0(3) |
| C(a2)–C(m1)–C(a3)   | 125.7(3) | C(a2)–C(m1)–H(m1)   | 117.1    |
| C(a3)–C(m1)–H(m1)   | 117.1    | C(a5)–C(m2)–C(a4)   | 125.7(3) |
| C(a5)–C(m2)–H(m2)   | 117.2    | C(a4)–C(m2)–H(m2)   | 117.2    |
| C(a6)–C(m3)–C(a7)   | 125.9(3) | C(a6)–C(m3)–H(m3)   | 117.0    |
| C(a7)–C(m3)–H(m3)   | 117.0    | C(a8)–C(m4)–C(a1)   | 125.9(3) |
| C(a8)–C(m4)–H(m4)   | 117.1    | C(a1)–C(m4)–H(m4)   | 117.1    |
| C(b1)–C(11)–C(12)   | 113.2(3) | C(b1)–C(11)–H(11a)  | 108.9    |
| C(12)–C(11)–H(11a)  | 108.9    | C(b1)–C(11)–H(11b)  | 108.9    |
| C(12)–C(11)–H(11b)  | 108.9    | H(11a)–C(11)–H(11b) | 107.8    |
| C(11)–C(12)–H(12a)  | 109.5    | C(11)–C(12)–H(12b)  | 109.5    |
| H(12a)–C(12)–H(12b) | 109.5    | C(11)–C(12)–H(12c)  | 109.5    |
| H(12a)–C(12)–H(12c) | 109.5    | H(12b)–C(12)–H(12c) | 109.5    |
| C(b2)–C(21)–C(22)   | 113.3(3) | C(b2)–C(21)–H(21a)  | 108.9    |
| C(22)–C(21)–H(21a)  | 108.9    | C(b2)–C(21)–H(21b)  | 108.9    |
| C(22)–C(21)–H(21b)  | 108.9    | H(21a)–C(21)–H(21b) | 107.7    |
| C(21)–C(22)–H(22a)  | 109.5    | C(21)–C(22)–H(22b)  | 109.5    |
| H(22a)–C(22)–H(22b) | 109.5    | C(21)–C(22)–H(22c)  | 109.5    |
| H(22a)–C(22)–H(22c) | 109.5    | H(22b)–C(22)–H(22c) | 109.5    |
| C(b3)–C(31)–C(32)   | 114.2(3) | C(b3)–C(31)–H(31a)  | 108.7    |
| C(32)–C(31)–H(31a)  | 108.7    | C(b3)–C(31)–H(31b)  | 108.7    |
| C(32)–C(31)–H(31b)  | 108.7    | H(31a)–C(31)–H(31b) | 107.6    |
| C(31)–C(32)–H(32a)  | 109.5    | C(31)–C(32)–H(32b)  | 109.5    |
| H(32a)–C(32)–H(32b) | 109.5    | C(31)–C(32)–H(32c)  | 109.5    |
| H(32a)–C(32)–H(32c) | 109.5    | H(32b)–C(32)–H(32c) | 109.5    |
| C(b4)–C(41)–C(42)   | 112.7(3) | C(b4)–C(41)–H(41a)  | 109.0    |
| C(42)–C(41)–H(41a)  | 109.0    | C(b4)–C(41)–H(41b)  | 109.0    |
| C(42)–C(41)–H(41b)  | 109.0    | H(41a)–C(41)–H(41b) | 107.8    |
| C(41)–C(42)–H(42a)  | 109.5    | C(41)–C(42)–H(42b)  | 109.5    |
| H(42a)–C(42)–H(42b) | 109.5    | C(41)–C(42)–H(42c)  | 109.5    |
| H(42a)–C(42)–H(42c) | 109.5    | H(42b)–C(42)–H(42c) | 109.5    |
| C(b5)–C(51)–C(52)   | 113.6(3) | C(b5)–C(51)–H(51a)  | 108.9    |
| C(52)–C(51)–H(51a)  | 108.9    | C(b5)–C(51)–H(51b)  | 108.9    |
| C(52)–C(51)–H(51b)  | 108.9    | H(51a)–C(51)–H(51b) | 107.7    |
| C(51)–C(52)–H(52a)  | 109.5    | C(51)–C(52)–H(52b)  | 109.5    |
| H(52a)–C(52)–H(52b) | 109.5    | C(51)–C(52)–H(52c)  | 109.5    |
| H(52a)–C(52)–H(52c) | 109.5    | H(52b)–C(52)–H(52c) | 109.5    |
| C(b6)–C(61)–C(62)   | 113.1(3) | C(b6)–C(61)–H(61a)  | 109.0    |

**Table S4.** Continued...

| angle               | degree   | angle               | degree   |
|---------------------|----------|---------------------|----------|
| C(62)–C(61)–H(61a)  | 109.0    | C(b6)–C(61)–H(61b)  | 109.0    |
| C(62)–C(61)–H(61b)  | 109.0    | H(61a)–C(61)–H(61b) | 107.8    |
| C(61)–C(62)–H(62a)  | 109.5    | C(61)–C(62)–H(62b)  | 109.5    |
| H(62a)–C(62)–H(62b) | 109.5    | C(61)–C(62)–H(62c)  | 109.5    |
| H(62a)–C(62)–H(62c) | 109.5    | H(62b)–C(62)–H(62c) | 109.5    |
| C(b7)–C(71)–C(72)   | 112.8(3) | C(b7)–C(71)–H(71a)  | 109.0    |
| C(72)–C(71)–H(71a)  | 109.0    | C(b7)–C(71)–H(71b)  | 109.0    |
| C(72)–C(71)–H(71b)  | 109.0    | H(71a)–C(71)–H(71b) | 107.8    |
| C(71)–C(72)–H(72a)  | 109.5    | C(71)–C(72)–H(72b)  | 109.5    |
| H(72a)–C(72)–H(72b) | 109.5    | C(71)–C(72)–H(72c)  | 109.5    |
| H(72a)–C(72)–H(72c) | 109.5    | H(72b)–C(72)–H(72c) | 109.5    |
| C(b8)–C(81)–C(82)   | 113.8(4) | C(b8)–C(81)–H(81a)  | 108.8    |
| C(82)–C(81)–H(81a)  | 108.8    | C(b8)–C(81)–H(81b)  | 108.8    |
| C(82)–C(81)–H(81b)  | 108.8    | H(81a)–C(81)–H(81b) | 107.7    |
| C(81)–C(82)–H(82a)  | 109.5    | C(81)–C(82)–H(82b)  | 109.5    |
| H(82a)–C(82)–H(82b) | 109.5    | C(81)–C(82)–H(82c)  | 109.5    |
| H(82a)–C(82)–H(82c) | 109.5    | H(82b)–C(82)–H(82c) | 109.5    |
| C(94)–N(5)–C(91)    | 105.1(3) | C(94)–N(5)–Fe(1)    | 125.9(2) |
| C(91)–N(5)–Fe(1)    | 128.9(2) | C(92)–C(91)–N(5)    | 109.9(3) |
| C(92)–C(91)–H(91)   | 125.1    | N(5)–C(91)–H(91)    | 125.1    |
| C(91)–C(92)–N(6)    | 106.1(3) | C(91)–C(92)–H(92)   | 127.0    |
| N(6)–C(92)–H(92)    | 127.0    | C(94)–N(6)–C(92)    | 107.3(3) |
| C(94)–N(6)–C(93)    | 126.3(3) | C(92)–N(6)–C(93)    | 126.4(3) |
| N(6)–C(93)–H(93a)   | 109.5    | N(6)–C(93)–H(93b)   | 109.5    |
| H(93a)–C(93)–H(93b) | 109.5    | N(6)–C(93)–H(93c)   | 109.5    |
| H(93a)–C(93)–H(93c) | 109.5    | H(93b)–C(93)–H(93c) | 109.5    |
| N(5)–C(94)–N(6)     | 111.7(3) | N(5)–C(94)–H(94)    | 124.2    |
| N(6)–C(94)–H(94)    | 124.2    |                     |          |

<sup>a</sup> The estimated standard deviations of the least significant digits are given in parentheses.

**Table S5.** Anisotropic displacement parameters ( $\text{\AA}^2 \times 10^3$ ) for  $[\text{Fe}(\text{OEP})(\text{CS})(1\text{-MeIm})]^a$ .

| Atom  | U <sub>11</sub> | U <sub>22</sub> | U <sub>33</sub> | U <sub>23</sub> | U <sub>13</sub> | U <sub>12</sub> |
|-------|-----------------|-----------------|-----------------|-----------------|-----------------|-----------------|
| Fe(1) | 10(1)           | 11(1)           | 8(1)            | -1(1)           | 3(1)            | -1(1)           |
| C(1)  | 14(2)           | 16(2)           | 7(2)            | -3(1)           | 4(1)            | -5(1)           |
| S(1)  | 23(1)           | 18(1)           | 25(1)           | 2(1)            | 5(1)            | 7(1)            |
| N(1)  | 9(1)            | 12(1)           | 11(1)           | -4(1)           | 3(1)            | -4(1)           |
| N(2)  | 11(1)           | 11(1)           | 12(1)           | -1(1)           | 4(1)            | 1(1)            |
| N(3)  | 12(1)           | 13(1)           | 7(1)            | -2(1)           | 3(1)            | -3(1)           |
| N(4)  | 13(1)           | 11(1)           | 10(1)           | -2(1)           | 3(1)            | -2(1)           |
| C(a1) | 14(2)           | 14(2)           | 11(2)           | -4(1)           | 1(1)            | 1(1)            |
| C(a1) | 11(2)           | 13(2)           | 13(2)           | -1(1)           | 1(1)            | -1(1)           |
| C(a3) | 12(2)           | 12(2)           | 13(2)           | 0(1)            | 6(1)            | 0(1)            |
| C(a4) | 13(2)           | 14(2)           | 11(2)           | -2(1)           | 5(1)            | 1(1)            |
| C(a5) | 14(2)           | 16(2)           | 7(2)            | -2(1)           | 1(1)            | -2(1)           |
| C(a6) | 10(2)           | 10(2)           | 13(2)           | -1(1)           | 2(1)            | -1(1)           |
| C(a7) | 14(2)           | 13(2)           | 14(2)           | 1(1)            | 6(1)            | -1(1)           |
| C(a8) | 16(2)           | 15(2)           | 14(2)           | -1(1)           | 7(1)            | 0(1)            |
| C(b1) | 13(2)           | 16(2)           | 14(2)           | -5(1)           | 1(1)            | 1(1)            |
| C(b2) | 10(2)           | 15(2)           | 18(2)           | -3(1)           | 0(1)            | 0(1)            |
| C(b3) | 16(2)           | 16(2)           | 14(2)           | 1(1)            | 9(1)            | 2(1)            |
| C(b4) | 17(2)           | 13(2)           | 15(2)           | 4(1)            | 9(1)            | 6(1)            |
| C(b5) | 14(2)           | 14(2)           | 12(2)           | -1(1)           | 0(1)            | 0(1)            |
| C(b6) | 12(2)           | 12(2)           | 13(2)           | 2(1)            | 0(1)            | -1(1)           |
| C(b7) | 15(2)           | 16(2)           | 13(2)           | 2(1)            | 6(1)            | 0(1)            |
| C(b8) | 19(2)           | 18(2)           | 11(2)           | 1(1)            | 7(1)            | 3(1)            |
| C(m1) | 13(2)           | 12(2)           | 20(2)           | -1(1)           | 7(1)            | -1(1)           |
| C(m2) | 16(2)           | 15(2)           | 8(2)            | 1(1)            | 3(1)            | 3(1)            |
| C(m3) | 11(2)           | 16(2)           | 13(2)           | 1(1)            | 4(1)            | -2(1)           |
| C(m4) | 20(2)           | 18(2)           | 9(2)            | -2(1)           | 3(1)            | -2(1)           |
| C(11) | 18(2)           | 30(2)           | 15(2)           | -3(2)           | -3(1)           | -3(2)           |
| C(12) | 28(2)           | 43(3)           | 28(2)           | -21(2)          | 1(2)            | -5(2)           |
| C(21) | 12(2)           | 23(2)           | 22(2)           | -4(2)           | 0(1)            | -1(1)           |
| C(22) | 17(2)           | 26(2)           | 54(3)           | 4(2)            | -1(2)           | -8(2)           |
| C(31) | 19(2)           | 17(2)           | 22(2)           | 4(1)            | 10(1)           | -2(1)           |
| C(32) | 17(2)           | 28(2)           | 51(3)           | -6(2)           | 11(2)           | -5(2)           |
| C(41) | 20(2)           | 23(2)           | 11(2)           | 2(1)            | 8(1)            | 2(1)            |
| C(42) | 23(2)           | 32(2)           | 19(2)           | -5(2)           | 8(2)            | 3(2)            |
| C(51) | 12(2)           | 27(2)           | 13(2)           | -1(1)           | -1(1)           | -1(1)           |
| C(52) | 38(2)           | 31(2)           | 23(2)           | -13(2)          | 4(2)            | -8(2)           |
| C(61) | 12(2)           | 21(2)           | 16(2)           | 3(1)            | -1(1)           | -3(1)           |

**Table S5.**Continued...

| Atom  | U <sub>11</sub> | U <sub>22</sub> | U <sub>33</sub> | U <sub>23</sub> | U <sub>13</sub> | U <sub>12</sub> |
|-------|-----------------|-----------------|-----------------|-----------------|-----------------|-----------------|
| C(62) | 14(2)           | 16(2)           | 37(2)           | 2(2)            | 5(2)            | -3(1)           |
| C(71) | 17(2)           | 27(2)           | 16(2)           | 3(2)            | 8(1)            | 0(2)            |
| C(72) | 24(2)           | 33(2)           | 36(2)           | 13(2)           | 12(2)           | -5(2)           |
| C(81) | 25(2)           | 37(2)           | 15(2)           | -7(2)           | 10(2)           | -6(2)           |
| C(82) | 35(2)           | 71(4)           | 16(2)           | 5(2)            | 7(2)            | 11(2)           |
| N(5)  | 12(1)           | 13(2)           | 13(1)           | 1(1)            | 4(1)            | -2(1)           |
| C(91) | 16(2)           | 24(2)           | 19(2)           | -3(2)           | 9(1)            | 2(1)            |
| C(92) | 18(2)           | 24(2)           | 19(2)           | 1(2)            | 7(1)            | 5(2)            |
| N(6)  | 16(1)           | 14(2)           | 18(2)           | 3(1)            | 3(1)            | 1(1)            |
| C(93) | 26(2)           | 18(2)           | 25(2)           | 7(2)            | 3(2)            | 1(2)            |
| C(94) | 12(2)           | 15(2)           | 16(2)           | 1(1)            | 3(1)            | -2(1)           |

<sup>a</sup> The estimated standard deviations of the least significant digits are given in parentheses. The anisotropic displacement factor exponent takes the form:

$$-2 \pi^2 [ h^2 a^{*2} U_{11} + \dots + 2 h k a^* b^* U_{12} ]$$

**Table S6.** Hydrogen coordinates ( $\times 10^4$ ) and isotropic displacement parameters ( $\text{\AA}^2 \times 10^3$ ) for [Fe(OEP)(CS)(1-MeIm)].

| Atom   | x     | y     | z     | U(eq) |
|--------|-------|-------|-------|-------|
| H(m1)  | 13354 | 2339  | 7570  | 17    |
| H(m2)  | 8722  | 490   | 5892  | 15    |
| H(m3)  | 5214  | 278   | 7863  | 16    |
| H(m4)  | 10287 | 1582  | 9624  | 19    |
| H(11a) | 13981 | 2329  | 9876  | 26    |
| H(11b) | 12750 | 1758  | 10020 | 26    |
| H(12a) | 12490 | 3453  | 9846  | 51    |
| H(12b) | 12529 | 3002  | 10459 | 51    |
| H(12c) | 11192 | 2895  | 9939  | 51    |
| H(21a) | 15004 | 2425  | 8404  | 23    |
| H(21b) | 15185 | 2477  | 9103  | 23    |
| H(22a) | 14104 | 3700  | 8291  | 50    |
| H(22b) | 15486 | 3753  | 8794  | 50    |
| H(22c) | 13944 | 3747  | 8967  | 50    |
| H(31a) | 13443 | 2778  | 6650  | 22    |
| H(31b) | 12899 | 2586  | 5970  | 22    |
| H(32a) | 14856 | 1610  | 6737  | 47    |
| H(32b) | 15278 | 2201  | 6252  | 47    |
| H(32c) | 14323 | 1429  | 6053  | 47    |
| H(41a) | 11416 | 1709  | 5336  | 21    |
| H(41b) | 9912  | 1283  | 5312  | 21    |
| H(42a) | 12584 | 478   | 5550  | 36    |
| H(42b) | 11437 | 390   | 4958  | 36    |
| H(42c) | 11103 | 43    | 5563  | 36    |
| H(51a) | 6572  | 72    | 5482  | 22    |
| H(51b) | 5028  | -128  | 5610  | 22    |
| H(52a) | 7324  | -1244 | 5744  | 46    |
| H(52b) | 5958  | -1271 | 5232  | 46    |
| H(52c) | 5802  | -1448 | 5897  | 46    |
| H(61a) | 3815  | -430  | 6373  | 20    |
| H(61b) | 3715  | 37    | 6967  | 20    |
| H(62a) | 4701  | -1567 | 6891  | 34    |
| H(62b) | 3328  | -1298 | 7145  | 34    |
| H(62c) | 4879  | -1100 | 7504  | 34    |
| H(71a) | 4370  | 644   | 8692  | 23    |
| H(71b) | 4904  | 734   | 9385  | 23    |
| H(72a) | 5173  | -691  | 8730  | 45    |

**Table S6.** Continued...

| Atom   | x    | y    | z     | U(eq) |
|--------|------|------|-------|-------|
| H(72b) | 4100 | -577 | 9179  | 45    |
| H(72c) | 5773 | -604 | 9419  | 45    |
| H(81a) | 6790 | 1281 | 10035 | 30    |
| H(81b) | 8285 | 1711 | 10049 | 30    |
| H(82a) | 7974 | 36   | 10247 | 61    |
| H(82b) | 8503 | 675  | 10754 | 61    |
| H(82c) | 9465 | 478  | 10275 | 61    |
| H(91)  | 7558 | 2540 | 8287  | 23    |
| H(92)  | 6384 | 3674 | 7708  | 24    |
| H(93a) | 7262 | 3596 | 6202  | 35    |
| H(93b) | 6891 | 4278 | 6635  | 35    |
| H(93c) | 5731 | 3616 | 6385  | 35    |
| H(94)  | 8475 | 2379 | 6695  | 17    |

**Table S7.** Crystal data and structure refinement for [Fe(OEP)(CS)(CH<sub>3</sub>OH)]

|                                   |                                                                                                                                    |
|-----------------------------------|------------------------------------------------------------------------------------------------------------------------------------|
| Empirical formula                 | C <sub>38</sub> H <sub>52</sub> FeN <sub>4</sub> OS                                                                                |
| Formula weight                    | 668.75                                                                                                                             |
| Temperature                       | 100(2) K                                                                                                                           |
| Wavelength                        | 0.71073 Å                                                                                                                          |
| Crystal system                    | Triclinic                                                                                                                          |
| Space group                       | <i>P</i> $\bar{1}$                                                                                                                 |
| Unit cell dimensions              | a = 9.0599(5) Å $\alpha$ = 90.2610° (10)<br>b = 9.4389(5) Å $\beta$ = 100.3620° (10)<br>c = 11.0676(6) Å $\gamma$ = 114.6640° (10) |
| Volume                            | 842.72(8) Å <sup>3</sup>                                                                                                           |
| Z                                 | 1                                                                                                                                  |
| Density (calculated)              | 1.318 g/cm <sup>3</sup>                                                                                                            |
| Absorption coefficient            | 0.546 mm <sup>-1</sup>                                                                                                             |
| F(000)                            | 358                                                                                                                                |
| Crystal size                      | 0.52 x 0.25 x 0.17 mm                                                                                                              |
| Diffractometer                    | Bruker APEX                                                                                                                        |
| Theta range for data collection   | 2.38 to 28.28 °                                                                                                                    |
| Index ranges                      | -11 ≤ h ≤ 12, -12 ≤ k ≤ 12, -14 ≤ l ≤ 14                                                                                           |
| Reflections collected             | 9096                                                                                                                               |
| Independent reflections           | 4178 [R(int) = 0.0189]                                                                                                             |
| Unique observed reflections       | 3956                                                                                                                               |
| Absorption correction             | SADABS                                                                                                                             |
| Max. and min. transmission        | 1.0000 and 0.9163                                                                                                                  |
| Refinement method                 | Full-matrix least-squares on F <sup>2</sup>                                                                                        |
| Data / restraints / parameters    | 4178 / 0 / 223                                                                                                                     |
| Goodness-of-fit on F <sup>2</sup> | 1.283                                                                                                                              |
| Final R indices [I ≥ 2σ(I)]       | R1 = 0.0587, wR2 = 0.1395                                                                                                          |
| R indices (all data)              | R1 = 0.0608, wR2 = 0.1403                                                                                                          |
| Largest diff. peak and hole       | 0.450 and -0.566 e.Å <sup>-3</sup>                                                                                                 |

**Table S8.** Atomic coordinates and equivalent isotropic displacement parameters ( $\text{\AA}^2$ ) for  $[\text{Fe}(\text{OEP})(\text{CS})(\text{CH}_3\text{OH})]^a$

| Atom  | x           | y           | z           | U(eq)      |
|-------|-------------|-------------|-------------|------------|
| Fe(1) | -0.5000     | -0.5000     | 0.5000      | 0.0216(2)  |
| N(1)  | -0.3870(3)  | -0.6345(2)  | 0.56181(19) | 0.0172(4)  |
| C(a1) | -0.2738(3)  | -0.6644(3)  | 0.5107(2)   | 0.0185(5)  |
| S(1)  | -0.1665(3)  | -0.2321(2)  | 0.69425(19) | 0.0256(4)  |
| C(19) | -0.3231(14) | -0.3514(9)  | 0.6006(11)  | 0.0194(16) |
| O(51) | -0.3028(10) | -0.2978(6)  | 0.5926(7)   | 0.0209(13) |
| C(51) | -0.2022(10) | -0.2942(10) | 0.7054(8)   | 0.0295(17) |
| C(b1) | -0.2188(3)  | -0.7679(3)  | 0.5829(2)   | 0.0193(5)  |
| N(2)  | -0.6124(3)  | -0.5419(2)  | 0.64366(19) | 0.0181(4)  |
| C(b2) | -0.2961(3)  | -0.7972(3)  | 0.6801(2)   | 0.0196(5)  |
| C(a2) | -0.3981(3)  | -0.7115(3)  | 0.6680(2)   | 0.0189(5)  |
| C(m1) | -0.4920(3)  | -0.7058(3)  | 0.7518(2)   | 0.0199(5)  |
| C(a3) | -0.5920(3)  | -0.6272(3)  | 0.7410(2)   | 0.0192(5)  |
| C(b3) | -0.6928(3)  | -0.6263(3)  | 0.8288(2)   | 0.0213(5)  |
| C(b4) | -0.7771(3)  | -0.5419(3)  | 0.7829(2)   | 0.0209(5)  |
| C(a4) | -0.7259(3)  | -0.4888(3)  | 0.6682(2)   | 0.0194(5)  |
| C(11) | -0.1044(3)  | -0.8323(3)  | 0.5481(3)   | 0.0240(5)  |
| C(12) | -0.1922(4)  | -0.9640(3)  | 0.4440(3)   | 0.0272(6)  |
| C(21) | -0.2860(3)  | -0.9006(3)  | 0.7810(2)   | 0.0235(5)  |
| C(22) | -0.4352(4)  | -1.0590(3)  | 0.7631(3)   | 0.0325(7)  |
| C(31) | -0.7019(4)  | -0.7090(4)  | 0.9447(3)   | 0.0285(6)  |
| C(32) | -0.8111(4)  | -0.8840(4)  | 0.9213(3)   | 0.0364(7)  |
| C(41) | -0.8991(3)  | -0.5043(3)  | 0.8363(3)   | 0.0256(6)  |
| C(42) | -0.8232(4)  | -0.3408(4)  | 0.9039(3)   | 0.0352(7)  |
| C(m2) | -0.7798(3)  | -0.3948(3)  | 0.5952(2)   | 0.0201(5)  |

<sup>a</sup> U(eq) is defined as one third of the trace of the orthogonalized  $U_{ij}$  tensor. The estimated standard deviations of the least significant digits are given in parentheses.



**Table S9.** Bond lengths for [Fe(OEP)(CS)(CH<sub>3</sub>OH)]<sup>a</sup>.

| bond                      | length Å  | bond                      | length Å  |
|---------------------------|-----------|---------------------------|-----------|
| Fe(1)-C(19)               | 1.800(12) | Fe(1)-C(19) <sup>#1</sup> | 1.801(12) |
| Fe(1)-N(1) <sup>#1</sup>  | 1.992(2)  | Fe(1)-N(1)                | 1.992(2)  |
| Fe(1)-N(2) <sup>#1</sup>  | 1.994(2)  | Fe(1)-N(2)                | 1.994(2)  |
| Fe(1)-O(51) <sup>#1</sup> | 2.089(7)  | Fe(1)-O(51)               | 2.089(7)  |
| N(1)-C(a1)                | 1.379(3)  | N(1)-C(a2)                | 1.382(3)  |
| C(a1)-C(m2) <sup>#1</sup> | 1.381(4)  | C(a1)-C(b1)               | 1.453(3)  |
| S(1)-C(19)                | 1.576(12) | O(51)-C(51)               | 1.398(11) |
| C(b1)-C(b2)               | 1.356(4)  | C(b1)-C(11)               | 1.503(3)  |
| N(2)-C(a3)                | 1.379(3)  | N(2)-C(a4)                | 1.382(3)  |
| C(b2)-C(a2)               | 1.452(3)  | C(b2)-C(21)               | 1.501(4)  |
| C(a2)-C(m1)               | 1.381(3)  | C(m1)-C(a3)               | 1.382(4)  |
| C(a3)-C(b3)               | 1.451(3)  | C(b3)-C(b4)               | 1.359(4)  |
| C(b3)-C(31)               | 1.502(4)  | C(b4)-C(a4)               | 1.450(3)  |
| C(b4)-C(41)               | 1.503(3)  | C(a4)-C(m2)               | 1.380(4)  |
| C(11)-C(12)               | 1.529(4)  | C(21)-C(22)               | 1.522(4)  |
| C(31)-C(32)               | 1.521(4)  | C(41)-C(42)               | 1.528(4)  |
| C(m2)-C(a1) <sup>#1</sup> | 1.381(4)  |                           |           |

<sup>a</sup> The estimated standard deviations of the least significant digits are given in parentheses. Symmetry transformations used to generate equivalent atoms:

<sup>#1</sup> -x-1,-y-1,-z+1

**Table S10.** Bond angles for [Fe(OEP)(CS)(CH<sub>3</sub>OH)]<sup>a</sup>.

| angle                                          | degree     | angle                                         | degree     |
|------------------------------------------------|------------|-----------------------------------------------|------------|
| C(19)–Fe(1)–C(19) <sup>#1</sup>                | 180.0(5)   | C(19)–Fe(1)–N(1) <sup>#1</sup>                | 97.5(3)    |
| C(19) <sup>#1</sup> –Fe(1)–N(1) <sup>#1</sup>  | 82.5(3)    | C(19)–Fe(1)–N(1)                              | 82.4(3)    |
| C(19) <sup>#1</sup> –Fe(1)–N(1)                | 97.6(3)    | N(1) <sup>#1</sup> –Fe(1)–N(1)                | 179.999(1) |
| C(19)–Fe(1)–N(2) <sup>#1</sup>                 | 92.9(3)    | C(19) <sup>#1</sup> –Fe(1)–N(2) <sup>#1</sup> | 87.1(3)    |
| N(1) <sup>#1</sup> –Fe(1)–N(2) <sup>#1</sup>   | 89.72(8)   | N(1)–Fe(1)–N(2) <sup>#1</sup>                 | 90.28(8)   |
| C(19)–Fe(1)–N(2)                               | 87.1(3)    | C(19) <sup>#1</sup> –Fe(1)–N(2)               | 92.9(3)    |
| N(1) <sup>#1</sup> –Fe(1)–N(2)                 | 90.28(8)   | N(1)–Fe(1)–N(2)                               | 89.72(8)   |
| N(2) <sup>#1</sup> –Fe(1)–N(2)                 | 180.00(11) | C(19)–Fe(1)–O(51) <sup>#1</sup>               | 168.8(4)   |
| C(19) <sup>#1</sup> –Fe(1)–O(51) <sup>#1</sup> | 11.2(4)    | N(1) <sup>#1</sup> –Fe(1)–O(51) <sup>#1</sup> | 92.34(19)  |
| N(1)–Fe(1)–O(51) <sup>#1</sup>                 | 87.67(19)  | N(2) <sup>#1</sup> –Fe(1)–O(51) <sup>#1</sup> | 92.4(2)    |
| N(2)–Fe(1)–O(51) <sup>#1</sup>                 | 87.6(2)    | C(19)–Fe(1)–O(51)                             | 11.2(4)    |
| C(19) <sup>#1</sup> –Fe(1)–O(51)               | 168.8(4)   | N(1) <sup>#1</sup> –Fe(1)–O(51)               | 87.66(19)  |
| N(1)–Fe(1)–O(51)                               | 92.33(19)  | N(2) <sup>#1</sup> –Fe(1)–O(51)               | 87.6(2)    |
| N(2)–Fe(1)–O(51)                               | 92.4(2)    | O(51) <sup>#1</sup> –Fe(1)–O(51)              | 180.0      |
| C(a1)–N(1)–C(a2)                               | 104.9(2)   | C(a1)–N(1)–Fe(1)                              | 127.22(17) |
| C(a2)–N(1)–Fe(1)                               | 127.78(16) | N(1)–C(a1)–C(m2) <sup>#1</sup>                | 124.8(2)   |
| N(1)–C(a1)–C(b1)                               | 110.9(2)   | C(m2) <sup>#1</sup> –C(a1)–C(b1)              | 124.3(2)   |
| S(1)–C(19)–Fe(1)                               | 175.4(6)   | C(51)–O(51)–Fe(1)                             | 124.2(5)   |
| C(b2)–C(b1)–C(a1)                              | 106.6(2)   | C(b2)–C(b1)–C(11)                             | 128.8(2)   |
| C(a1)–C(b1)–C(11)                              | 124.5(2)   | C(a3)–N(2)–C(a4)                              | 105.1(2)   |
| C(a3)–N(2)–Fe(1)                               | 127.74(17) | C(a4)–N(2)–Fe(1)                              | 127.13(17) |
| C(b1)–C(b2)–C(a2)                              | 106.7(2)   | C(b1)–C(b2)–C(21)                             | 128.4(2)   |
| C(a2)–C(b2)–C(21)                              | 124.9(2)   | C(m1)–C(a2)–N(1)                              | 124.5(2)   |
| C(m1)–C(a2)–C(b2)                              | 124.8(2)   | N(1)–C(a2)–C(b2)                              | 110.8(2)   |
| C(a2)–C(m1)–C(a3)                              | 125.7(2)   | N(2)–C(a3)–C(m1)                              | 124.5(2)   |
| N(2)–C(a3)–C(b3)                               | 110.8(2)   | C(m1)–C(a3)–C(b3)                             | 124.6(2)   |
| C(b4)–C(b3)–C(a3)                              | 106.6(2)   | C(b4)–C(b3)–C(31)                             | 128.5(2)   |
| C(a3)–C(b3)–C(31)                              | 124.9(2)   | C(b3)–C(b4)–C(a4)                             | 106.8(2)   |
| C(b3)–C(b4)–C(41)                              | 129.0(2)   | C(a4)–C(b4)–C(41)                             | 124.2(2)   |
| C(m2)–C(a4)–N(2)                               | 124.7(2)   | C(m2)–C(a4)–C(b4)                             | 124.6(2)   |
| N(2)–C(a4)–C(b4)                               | 110.6(2)   | C(b1)–C(11)–C(12)                             | 112.1(2)   |
| C(b2)–C(21)–C(22)                              | 113.3(2)   | C(b3)–C(31)–C(32)                             | 113.0(2)   |
| C(b4)–C(41)–C(42)                              | 113.4(2)   | C(a4)–C(m2)–C(a1) <sup>#1</sup>               | 125.7(2)   |

<sup>a</sup> The estimated standard deviations of the least significant digits are given in parentheses. Symmetry transformations used to generate equivalent atoms:

#1 -x-1,-y-1,-z+1

**Table S11.** Anisotropic displacement parameters ( $\text{\AA}^2$ ) for  $[\text{Fe}(\text{OEP})(\text{CS})(\text{CH}_3\text{OH})]^a$ .

| Atom  | $U_{11}$   | $U_{22}$   | $U_{33}$   | $U_{23}$    | $U_{13}$    | $U_{12}$   |
|-------|------------|------------|------------|-------------|-------------|------------|
| Fe(1) | 0.0289(3)  | 0.0170(3)  | 0.0289(3)  | 0.0090(2)   | 0.0179(2)   | 0.0145(2)  |
| N(1)  | 0.0167(10) | 0.0172(10) | 0.0174(10) | -0.0001(8)  | 0.0033(8)   | 0.0070(8)  |
| C(a1) | 0.0157(11) | 0.0169(11) | 0.0207(12) | -0.0046(9)  | 0.0006(9)   | 0.0062(9)  |
| S(1)  | 0.0222(9)  | 0.0230(9)  | 0.0255(8)  | -0.0029(8)  | -0.0001(6)  | 0.0059(8)  |
| C(19) | 0.026(4)   | 0.015(4)   | 0.023(3)   | 0.007(3)    | 0.009(2)    | 0.013(4)   |
| O(51) | 0.024(3)   | 0.020(3)   | 0.021(2)   | 0.002(3)    | 0.0060(18)  | 0.011(3)   |
| C(51) | 0.027(4)   | 0.027(4)   | 0.027(4)   | -0.003(4)   | 0.000(3)    | 0.006(4)   |
| C(b1) | 0.0150(11) | 0.0183(11) | 0.0212(12) | -0.0040(9)  | -0.0019(9)  | 0.0059(9)  |
| N(2)  | 0.0168(10) | 0.0194(10) | 0.0189(10) | 0.0006(8)   | 0.0057(8)   | 0.0076(8)  |
| C(b2) | 0.0163(11) | 0.0173(11) | 0.0216(12) | -0.0031(9)  | -0.0014(9)  | 0.0059(9)  |
| C(a2) | 0.0169(11) | 0.0158(11) | 0.0211(12) | -0.0004(9)  | 0.0010(9)   | 0.0053(9)  |
| C(m1) | 0.0204(12) | 0.0195(11) | 0.0181(12) | 0.0024(9)   | 0.0024(9)   | 0.0073(10) |
| C(a3) | 0.0177(11) | 0.0196(11) | 0.0181(12) | -0.0005(9)  | 0.0035(9)   | 0.0058(9)  |
| C(b3) | 0.0196(12) | 0.0228(12) | 0.0193(12) | -0.0003(9)  | 0.0057(9)   | 0.0062(10) |
| C(b4) | 0.0184(12) | 0.0225(12) | 0.0194(12) | -0.0025(9)  | 0.0056(9)   | 0.0056(10) |
| C(a4) | 0.0168(11) | 0.0166(11) | 0.0233(12) | -0.0029(9)  | 0.0062(9)   | 0.0047(9)  |
| C(11) | 0.0226(13) | 0.0281(13) | 0.0238(13) | -0.0034(10) | 0.0003(10)  | 0.0149(11) |
| C(12) | 0.0307(15) | 0.0289(14) | 0.0257(14) | -0.0055(11) | -0.0034(11) | 0.0199(12) |
| C(21) | 0.0230(13) | 0.0243(13) | 0.0225(13) | -0.0005(10) | -0.0009(10) | 0.0117(11) |
| C(22) | 0.0303(15) | 0.0267(14) | 0.0381(17) | 0.0099(12)  | 0.0001(12)  | 0.0125(12) |
| C(31) | 0.0283(14) | 0.0365(15) | 0.0221(13) | 0.0050(11)  | 0.0090(11)  | 0.0136(12) |
| C(32) | 0.0260(15) | 0.0376(17) | 0.0386(17) | 0.0178(14)  | 0.0056(13)  | 0.0072(13) |
| C(41) | 0.0216(13) | 0.0314(14) | 0.0259(13) | 0.0032(11)  | 0.0112(11)  | 0.0107(11) |
| C(42) | 0.0272(15) | 0.0461(18) | 0.0324(16) | -0.0140(14) | 0.0059(12)  | 0.0158(14) |
| C(m2) | 0.0141(11) | 0.0196(12) | 0.0257(13) | -0.0039(10) | 0.0046(9)   | 0.0062(9)  |

<sup>a</sup> The estimated standard deviations of the least significant digits are given in parentheses. The anisotropic displacement factor exponent takes the form:

$$-2 \pi^2 [ h^2 a^{*2} U_{11} + \dots + 2 h k a^* b^* U_{12} ]$$

**Table S12.** Hydrogen coordinates and isotropic displacement parameters ( $\text{\AA}^2$ ) for  $[\text{Fe}(\text{OEP})(\text{CS})(\text{CH}_3\text{OH})]$ .

| Atom   | x       | y       | z      | U(eq) |
|--------|---------|---------|--------|-------|
| H(51)  | -0.2293 | -0.2690 | 0.5322 | 0.025 |
| H(51a) | -0.1220 | -0.2055 | 0.7609 | 0.035 |
| H(51b) | -0.1647 | -0.3693 | 0.6890 | 0.035 |
| H(51c) | -0.2764 | -0.3553 | 0.7543 | 0.035 |
| H(m1)  | -0.4819 | -0.7604 | 0.8228 | 0.024 |
| H(11a) | -0.0227 | -0.7544 | 0.5244 | 0.029 |
| H(11b) | -0.0779 | -0.8782 | 0.6177 | 0.029 |
| H(12a) | -0.2954 | -1.0522 | 0.4611 | 0.033 |
| H(12b) | -0.2137 | -0.9283 | 0.3745 | 0.033 |
| H(12c) | -0.1162 | -0.9948 | 0.4262 | 0.033 |
| H(21a) | -0.2597 | -0.8492 | 0.8584 | 0.028 |
| H(22b) | -0.1971 | -0.9169 | 0.7793 | 0.028 |
| H(22a) | -0.4259 | -1.1195 | 0.8312 | 0.039 |
| H(22b) | -0.4574 | -1.1215 | 0.6764 | 0.039 |
| H(22c) | -0.5224 | -1.0412 | 0.7756 | 0.039 |
| H(31a) | -0.5880 | -0.6802 | 0.9873 | 0.034 |
| H(31b) | -0.7368 | -0.6613 | 0.9989 | 0.034 |
| H(32a) | -0.7552 | -0.9291 | 0.8759 | 0.044 |
| H(32b) | -0.8218 | -0.9555 | 0.9719 | 0.044 |
| H(32c) | -0.9325 | -0.9117 | 0.8775 | 0.044 |
| H(41a) | -0.9455 | -0.5756 | 0.8798 | 0.031 |
| H(41b) | -0.9801 | -0.5186 | 0.7852 | 0.031 |
| H(42a) | -0.8995 | -0.3207 | 0.9356 | 0.042 |
| H(42b) | -0.7640 | -0.2677 | 0.8603 | 0.042 |
| H(42c) | -0.7555 | -0.3425 | 0.9544 | 0.042 |
| H(m2)  | -0.8545 | -0.3696 | 0.6188 | 0.024 |

**Table S13.** Complete Crystallographic Details for [Fe(OEP)(CS)(Py)]

---

|                                                              |                                                                   |
|--------------------------------------------------------------|-------------------------------------------------------------------|
| formula                                                      | C <sub>42</sub> H <sub>49</sub> FeN <sub>5</sub> S                |
| FW, amu                                                      | 711.77                                                            |
| <i>a</i> , Å                                                 | 13.9073(6)                                                        |
| <i>b</i> , Å                                                 | 16.2624(7)                                                        |
| <i>c</i> , Å                                                 | 22.0709(9)                                                        |
| $\alpha$ , deg                                               | 70.5860(10)                                                       |
| $\beta$ , deg                                                | 77.2420(10)                                                       |
| $\gamma$ , deg                                               | 77.9590(10)                                                       |
| <i>V</i> , Å <sup>3</sup>                                    | 4541.8(3)                                                         |
| space group                                                  | P $\bar{1}$                                                       |
| <i>Z</i>                                                     | 5                                                                 |
| D <sub>c</sub> , g/cm <sup>3</sup>                           | 1.301                                                             |
| F(000)                                                       | 1890                                                              |
| $\mu$ , mm <sup>-1</sup>                                     | 0.510                                                             |
| crystal dimensions, mm                                       | 0.3 × 0.2 × 0.2                                                   |
| radiation                                                    | MoK $\alpha$ , $\bar{\lambda}$ = 0.71073 Å                        |
| temperature, K                                               | 100(2)                                                            |
| diffractometer                                               | Enraf Bruker Apex CCD                                             |
| $\theta$ range for collected data, deg                       | 1.87–28.29                                                        |
| index range                                                  | –18 ≤ <i>h</i> ≤ 18<br>–21 ≤ <i>k</i> ≤ 21<br>–29 ≤ <i>l</i> ≤ 29 |
| total data collected                                         | 49146                                                             |
| absorption correction                                        | SADABS                                                            |
| Max. and min. transmission                                   | 1.0000 and 0.9086                                                 |
| unique data                                                  | 22494 ( <i>R</i> <sub>int</sub> = 0.023)                          |
| unique observed data [ <i>I</i> > 2 $\sigma$ ( <i>I</i> )]   | 18114                                                             |
| refinement method                                            | Full-matrix least-squares on F <sup>2</sup>                       |
| data/restraints/parameters                                   | 22494/0/1370                                                      |
| goodness-of-fit (based on <i>F</i> <sup>2</sup> )            | 1.029                                                             |
| final <i>R</i> indices [ <i>I</i> > 2 $\sigma$ ( <i>I</i> )] | <i>R</i> <sub>1</sub> = 0.0458, <i>wR</i> <sub>2</sub> = 0.1106   |
| final <i>R</i> indices (all data)                            | <i>R</i> <sub>1</sub> = 0.0587, <i>wR</i> <sub>2</sub> = 0.1185   |

---

**Table S14.** Atomic Coordinates and Equivalent Isotropic Displacement Parameters ( $\text{\AA}^2$ ) for  $[\text{Fe}(\text{OEP})(\text{CS})(\text{Py})]^\alpha$

| atom     | <i>x</i>     | <i>y</i>    | <i>z</i>    | <i>U</i> (eq) |
|----------|--------------|-------------|-------------|---------------|
| Fe(1)_1  | −0.09618(2)  | 0.76543(2)  | 0.92497(1)  | 0.0271(1)     |
| S(1)_1   | 0.13752(4)   | 0.73055(4)  | 0.94298(3)  | 0.0392(1)     |
| N(1)_1   | −0.14592(11) | 0.68330(10) | 1.01145(7)  | 0.0247(3)     |
| N(2)_1   | −0.13042(14) | 0.86500(11) | 0.96409(8)  | 0.0391(4)     |
| N(3)_1   | −0.05788(13) | 0.84990(10) | 0.83678(8)  | 0.0338(4)     |
| N(4)_1   | −0.07095(11) | 0.66713(9)  | 0.88508(7)  | 0.0230(3)     |
| N(5)_1   | −0.24637(12) | 0.79352(10) | 0.90595(8)  | 0.0313(4)     |
| C(a2)_1  | −0.18041(15) | 0.70211(12) | 1.06958(9)  | 0.0291(4)     |
| C(m1)_1  | −0.1869(2)   | 0.78426(14) | 1.07740(10) | 0.0483(6)     |
| C(a3)_1  | −0.1638(2)   | 0.86005(15) | 1.02842(12) | 0.0582(8)     |
| C(b3)_1  | −0.1996(3)   | 0.9541(2)   | 1.03115(19) | 0.0256(7)     |
| C(b4)_1  | −0.1692(3)   | 1.0099(2)   | 0.97205(18) | 0.0223(7)     |
| C(31)_1  | −0.2495(4)   | 0.9749(3)   | 1.0945(2)   | 0.0341(8)     |
| C(32)_1  | −0.1800(4)   | 0.9577(4)   | 1.1413(3)   | 0.0480(12)    |
| C(31)_1  | −0.1626(4)   | 1.1059(3)   | 0.9550(2)   | 0.0252(8)     |
| C(42)_1  | −0.0597(3)   | 1.1248(2)   | 0.95654(19) | 0.0278(7)     |
| C(b3a)_1 | −0.1487(3)   | 0.9371(3)   | 1.0444(2)   | 0.0264(8)     |
| C(b4a)_1 | −0.1219(3)   | 0.9947(3)   | 0.9852(2)   | 0.0255(8)     |
| C(41a)_1 | −0.1790(4)   | 0.9546(3)   | 1.1085(2)   | 0.0375(11)    |
| C(32a)_1 | −0.2927(4)   | 0.9688(3)   | 1.1317(3)   | 0.0529(15)    |
| C(41a)_1 | −0.1095(4)   | 1.0906(3)   | 0.9688(2)   | 0.0324(9)     |
| C(42a)_1 | −0.2010(4)   | 1.1495(3)   | 0.9467(2)   | 0.0393(10)    |
| C(a4)_1  | −0.1190(2)   | 0.95191(14) | 0.93234(12) | 0.0527(7)     |
| C(m2)_1  | −0.0857(2)   | 0.98606(14) | 0.86648(12) | 0.0531(7)     |
| C(a5)_1  | −0.0567(2)   | 0.93868(14) | 0.82181(11) | 0.0477(6)     |
| C(b5)_1  | −0.0308(3)   | 0.9782(2)   | 0.74948(16) | 0.0256(6)     |
| C(b6)_1  | −0.0065(3)   | 0.9097(2)   | 0.72348(16) | 0.0238(6)     |
| C(51)_1  | −0.0217(3)   | 1.0732(2)   | 0.71448(16) | 0.0286(6)     |
| C(52)_1  | 0.0837(3)    | 1.0955(2)   | 0.7020(2)   | 0.0434(8)     |
| C(61)_1  | 0.0329(3)    | 0.9121(2)   | 0.65395(17) | 0.0303(7)     |
| C(62)_1  | 0.1449(3)    | 0.8795(3)   | 0.64420(18) | 0.0456(8)     |
| C(b5a)_1 | 0.0132(5)    | 0.9681(4)   | 0.7632(3)   | 0.0289(12)    |
| C(b6a)_1 | 0.0340(5)    | 0.9011(4)   | 0.7363(3)   | 0.0253(12)    |
| C(51a)_1 | 0.0419(5)    | 1.0605(4)   | 0.7323(3)   | 0.0344(12)    |

**Table S14.** Continued...

| atom     | <i>x</i>     | <i>y</i>    | <i>z</i>    | <i>U</i> (eq) |
|----------|--------------|-------------|-------------|---------------|
| C(52a)_1 | -0.0408(6)   | 1.1227(5)   | 0.7001(3)   | 0.0429(15)    |
| C(61a)_1 | 0.0815(5)    | 0.9025(4)   | 0.6672(3)   | 0.0280(13)    |
| C(62a)_1 | 0.0067(5)    | 0.9174(5)   | 0.6208(3)   | 0.0391(14)    |
| C(a6)_1  | -0.01887(17) | 0.82921(13) | 0.77973(10) | 0.0386(5)     |
| C(m3)_1  | -0.00491(15) | 0.74558(12) | 0.77317(9)  | 0.0316(4)     |
| C(a7)_1  | -0.02863(13) | 0.66992(12) | 0.82201(9)  | 0.0245(3)     |
| C(b7)_1  | -0.01314(12) | 0.58302(11) | 0.81377(8)  | 0.0228(3)     |
| C(b8)_1  | -0.04666(12) | 0.52739(11) | 0.87251(8)  | 0.0217(3)     |
| C(a8)_1  | -0.08136(12) | 0.58001(11) | 0.91689(8)  | 0.0212(3)     |
| C(m4)_1  | -0.11906(12) | 0.54670(11) | 0.98214(8)  | 0.0213(3)     |
| C(a1)_1  | -0.15021(12) | 0.59494(11) | 1.02598(8)  | 0.0212(3)     |
| C(b1)_1  | -0.19082(12) | 0.55811(11) | 1.09421(8)  | 0.0214(3)     |
| C(b2)_1  | -0.21053(13) | 0.62496(12) | 1.12099(9)  | 0.0252(4)     |
| C(71)_1  | 0.03065(13)  | 0.55998(12) | 0.75185(8)  | 0.0255(4)     |
| C(72)_1  | -0.04822(15) | 0.55106(15) | 0.71728(10) | 0.0356(4)     |
| C(81)_1  | -0.04903(13) | 0.43037(11) | 0.88983(9)  | 0.0235(3)     |
| C(82)_1  | -0.15320(13) | 0.40862(12) | 0.89516(9)  | 0.0284(4)     |
| C(11)_1  | -0.20812(13) | 0.46404(11) | 1.12590(8)  | 0.0233(3)     |
| C(12)_1  | -0.30576(14) | 0.44638(13) | 1.11498(9)  | 0.0296(4)     |
| C(21)_1  | -0.26153(15) | 0.62497(13) | 1.18833(9)  | 0.0305(4)     |
| C(22)_1  | -0.37096(17) | 0.66430(16) | 1.19015(11) | 0.0490(6)     |
| C(1)_1   | 0.02471(15)  | 0.74570(12) | 0.93692(9)  | 0.0300(4)     |
| C(2)_1   | -0.32358(16) | 0.81177(13) | 0.95090(11) | 0.0384(5)     |
| C(3)_1   | -0.42117(17) | 0.83240(14) | 0.94014(12) | 0.0460(6)     |
| C(4)_1   | -0.44173(17) | 0.83421(14) | 0.88140(12) | 0.0462(6)     |
| C(5)_1   | -0.36364(17) | 0.81473(14) | 0.83507(11) | 0.0427(5)     |
| C(6)_1   | -0.26761(2)  | 0.79477(1)  | 0.84911(1)  | 0.0361(4)     |
| Fe(1)_2  | 0.29602(2)   | 0.60481(1)  | 0.30865(1)  | 0.0193(1)     |
| S(1)_2   | 0.51471(2)   | 0.52877(1)  | 0.35244(1)  | 0.0345(1)     |
| N(1)_2   | 0.31618(2)   | 0.73053(1)  | 0.26296(1)  | 0.0277(3)     |
| N(2)_2   | 0.24109(2)   | 0.63435(1)  | 0.39206(1)  | 0.0212(3)     |
| N(3)_2   | 0.26598(2)   | 0.48140(1)  | 0.35212(1)  | 0.0195(3)     |
| N(4)_2   | 0.34329(2)   | 0.57746(1)  | 0.22358(1)  | 0.0215(3)     |
| N(5)_2   | 0.14649(2)   | 0.64437(1)  | 0.28697(1)  | 0.0234(3)     |

**Table S14.** Continued...

| atom     | <i>x</i>    | <i>y</i>    | <i>z</i>    | <i>U</i> (eq) |
|----------|-------------|-------------|-------------|---------------|
| C(a2)_2  | 0.29482(18) | 0.79869(13) | 0.28972(10) | 0.0395(5)     |
| C(m1)_2  | 0.25703(18) | 0.79089(13) | 0.35457(10) | 0.0394(5)     |
| C(a3)_2  | 0.23232(14) | 0.71429(12) | 0.40243(9)  | 0.0266(4)     |
| C(b3)_2  | 0.19373(15) | 0.70800(13) | 0.47029(9)  | 0.0302(4)     |
| C(b4)_2  | 0.18028(13) | 0.62295(12) | 0.50093(8)  | 0.0242(3)     |
| C(a4)_2  | 0.21033(12) | 0.57732(11) | 0.45171(8)  | 0.0215(3)     |
| C(m2)_2  | 0.20585(13) | 0.48922(11) | 0.46329(8)  | 0.0231(3)     |
| C(a5)_2  | 0.23284(12) | 0.44411(11) | 0.41727(8)  | 0.0213(3)     |
| C(b5)_2  | 0.23338(13) | 0.35029(11) | 0.43179(8)  | 0.0233(3)     |
| C(b6)_2  | 0.26940(13) | 0.33057(11) | 0.37495(8)  | 0.0226(3)     |
| C(a6)_2  | 0.29015(12) | 0.41271(11) | 0.32599(8)  | 0.0203(3)     |
| C(m3)_2  | 0.33166(12) | 0.42002(11) | 0.26149(8)  | 0.0217(3)     |
| C(a7)_2  | 0.35768(12) | 0.49604(11) | 0.21427(8)  | 0.0211(3)     |
| C(b7)_2  | 0.40649(13) | 0.49996(12) | 0.14808(8)  | 0.0236(3)     |
| C(b8)_2  | 0.42159(13) | 0.58515(12) | 0.11754(8)  | 0.0253(4)     |
| C(a8)_2  | 0.38257(14) | 0.63285(12) | 0.16505(8)  | 0.0256(4)     |
| C(m4)_2  | 0.38599(16) | 0.72104(13) | 0.15329(9)  | 0.0329(4)     |
| C(a1)_2  | 0.35386(17) | 0.76703(13) | 0.19852(9)  | 0.0362(5)     |
| C(b1)_2  | 0.3460(2)   | 0.86371(19) | 0.18181(14) | 0.0261(6)     |
| C(b2)_2  | 0.3087(2)   | 0.88357(18) | 0.23834(14) | 0.0272(6)     |
| C(11)_2  | 0.3829(3)   | 0.9239(2)   | 0.11691(15) | 0.0316(6)     |
| C(12)_2  | 0.4950(3)   | 0.9265(2)   | 0.10390(15) | 0.0372(7)     |
| C(21)_2  | 0.2924(3)   | 0.97125(18) | 0.25086(15) | 0.0329(6)     |
| C(22)_2  | 0.3796(3)   | 0.98263(19) | 0.27747(16) | 0.0407(7)     |
| C(b1a)_2 | 0.3900(6)   | 0.8491(5)   | 0.1935(4)   | 0.0241(15)    |
| C(b2a)_2 | 0.3546(6)   | 0.8674(5)   | 0.2501(4)   | 0.0239(14)    |
| C(11a)_2 | 0.4444(8)   | 0.9088(5)   | 0.1295(4)   | 0.0318(15)    |
| C(12a)_2 | 0.3742(8)   | 0.9493(7)   | 0.0827(6)   | 0.054(3)      |
| C(21a)_2 | 0.3487(6)   | 0.9527(4)   | 0.2649(4)   | 0.0235(13)    |
| C(22a)_2 | 0.2446(5)   | 1.0049(5)   | 0.2703(4)   | 0.0310(15)    |
| C(31)_2  | 0.1752(2)   | 0.78275(15) | 0.49923(11) | 0.0503(7)     |
| C(32)_2  | 0.0938(3)   | 0.8450(2)   | 0.48941(19) | 0.0291(8)     |
| C(31a)_2 | 0.2420(4)   | 0.7991(3)   | 0.5243(3)   | 0.0478(11)    |
| C(41)_2  | 0.14289(14) | 0.57992(12) | 0.57153(9)  | 0.0282(4)     |



**Table S14.** Continued...

| atom     | <i>x</i>     | <i>y</i>    | <i>z</i>    | <i>U</i> (eq) |
|----------|--------------|-------------|-------------|---------------|
| C(42)_2  | 0.22597(16)  | 0.52578(14) | 0.60979(9)  | 0.0354(4)     |
| C(51)_2  | 0.19804(15)  | 0.29021(12) | 0.49763(9)  | 0.0309(4)     |
| C(52)_2  | 0.08475(18)  | 0.29694(18) | 0.51274(11) | 0.0506(6)     |
| C(61)_2  | 0.28847(15)  | 0.24265(11) | 0.36287(9)  | 0.0278(4)     |
| C(62)_2  | 0.20837(18)  | 0.22735(15) | 0.33186(12) | 0.0450(5)     |
| C(71)_2  | 0.43269(13)  | 0.42363(12) | 0.12056(8)  | 0.0259(4)     |
| C(72)_2  | 0.34943(14)  | 0.41222(12) | 0.09040(9)  | 0.0275(4)     |
| C(81)_2  | 0.46914(15)  | 0.62446(13) | 0.04862(9)  | 0.0314(4)     |
| C(82)_2  | 0.39435(16)  | 0.67521(14) | 0.00313(9)  | 0.0359(4)     |
| C(1)_2   | 0.41185(13)  | 0.56965(11) | 0.32960(8)  | 0.0234(3)     |
| C(2)_2   | 0.12896(16)  | 0.69111(12) | 0.22655(9)  | 0.0304(4)     |
| C(3)_2   | 0.03463(17)  | 0.71961(13) | 0.21079(10) | 0.0381(5)     |
| C(4)_2   | -0.04677(17) | 0.70031(14) | 0.25884(11) | 0.0391(5)     |
| C(5)_2   | -0.03036(15) | 0.65252(13) | 0.32157(11) | 0.0357(4)     |
| C(6)_2   | 0.06659(14)  | 0.62584(12) | 0.33334(9)  | 0.0284(4)     |
| Fe(1)_3  | 0.50000(14)  | 0.00000(12) | 0.50000(9)  | 0.0463(1)     |
| N(5)_3   | 0.3615(2)    | 0.0153(2)   | 0.48746(13) | 0.020(2)      |
| C(2)_3   | 0.3416(2)    | 0.00230(19) | 0.43363(13) | 0.0299(8)     |
| C(3)_3   | 0.24535(19)  | 0.01625(17) | 0.42315(12) | 0.0347(9)     |
| C(4)_3   | 0.16905(18)  | 0.04326(17) | 0.46650(12) | 0.0340(8)     |
| C(5)_3   | 0.18896(18)  | 0.05630(16) | 0.52034(12) | 0.0315(8)     |
| C(6)_3   | 0.2852(2)    | 0.04235(18) | 0.53081(12) | 0.0293(8)     |
| S(1)_3   | 0.25746(9)   | 0.01593(8)  | 0.47383(8)  | 0.0596(4)     |
| C(1)_3   | 0.3683(6)    | 0.0132(5)   | 0.4850(4)   | 0.046(4)      |
| N(1)_3   | 0.46553(14)  | 0.10003(10) | 0.53829(8)  | 0.0363(4)     |
| N(2)_3   | 0.53632(13)  | 0.08354(10) | 0.41166(7)  | 0.0321(4)     |
| C(a1)_3  | 0.4487(3)    | 0.0937(2)   | 0.60484(16) | 0.0270(7)     |
| C(b1)_3  | 0.4362(3)    | 0.18059(19) | 0.61269(14) | 0.0263(6)     |
| C(m2)_3  | 0.4331(3)    | 0.0169(2)   | 0.65492(16) | 0.0334(7)     |
| C(11)_3  | 0.4103(2)    | 0.20022(19) | 0.67702(16) | 0.0304(6)     |
| C(12)_3  | 0.2991(3)    | 0.2138(3)   | 0.6996(2)   | 0.0446(8)     |
| C(1a)_3  | 0.3993(5)    | 0.1010(4)   | 0.5971(3)   | 0.0239(11)    |
| C(2a)_3  | 0.3822(4)    | 0.1882(3)   | 0.6045(3)   | 0.0219(10)    |
| C(10b)_3 | 0.3765(6)    | 0.0253(4)   | 0.6458(3)   | 0.0334(14)    |

**Table S14.** Continued...

| atom     | $x$         | $y$         | $z$         | $U(\text{eq})$ |
|----------|-------------|-------------|-------------|----------------|
| C(11a)_3 | 0.3303(4)   | 0.2111(3)   | 0.6652(3)   | 0.0282(12)     |
| C(12a)_3 | 0.3921(6)   | 0.1899(5)   | 0.7189(3)   | 0.0515(19)     |
| C(b2)_3  | 0.44265(17) | 0.23995(12) | 0.55042(10) | 0.0359(5)      |
| C(a2)_3  | 0.47153(14) | 0.18734(11) | 0.50583(9)  | 0.0253(4)      |
| C(m1)_3  | 0.50217(12) | 0.22119(11) | 0.43985(8)  | 0.0222(3)      |
| C(a3)_3  | 0.53349(13) | 0.17284(11) | 0.39595(8)  | 0.0236(3)      |
| C(b3)_3  | 0.56630(15) | 0.21094(12) | 0.32673(9)  | 0.0288(4)      |
| C(b4)_3  | 0.5799(4)   | 0.1432(6)   | 0.2998(4)   | 0.0255(10)     |
| C(a4)_3  | 0.5581(4)   | 0.0661(4)   | 0.3518(3)   | 0.0287(10)     |
| C(41)_3  | 0.6203(6)   | 0.1472(4)   | 0.2309(2)   | 0.0344(11)     |
| C(42)_3  | 0.7398(6)   | 0.1298(5)   | 0.2140(3)   | 0.056(2)       |
| C(8a)_3  | 0.6132(11)  | 0.1431(10)  | 0.3039(8)   | 0.056(4)       |
| C(9a)_3  | 0.5957(7)   | 0.0598(8)   | 0.3588(5)   | 0.032(2)       |
| C(41a)_3 | 0.7082(14)  | 0.1379(9)   | 0.2289(8)   | 0.101(6)       |
| C(42a)_3 | 0.6308(17)  | 0.1455(13)  | 0.2119(9)   | 0.114(7)       |
| C(21)_3  | 0.44281(15) | 0.33729(12) | 0.53152(9)  | 0.0298(4)      |
| C(22)_3  | 0.54771(16) | 0.36096(14) | 0.51900(11) | 0.0381(5)      |
| C(31)_3  | 0.57443(15) | 0.30686(12) | 0.29328(9)  | 0.0291(4)      |
| C(32)_3  | 0.66995(16) | 0.33361(14) | 0.29835(11) | 0.0390(5)      |

<sup>a</sup>  $U(\text{eg})$  is defined as one third of the trace of the orthogonalized  $\mathbf{U}_{ij}$  tensor. The estimated standard deviations of the least significant digits are given in parentheses.

**Table S15.** Bond Lengths for [Fe(OEP)(CS)(Py)]<sup>a</sup>

| bond              | length (Å) | bond              | length (Å) |
|-------------------|------------|-------------------|------------|
| Fe(1)_1-C(1)_1    | 1.707(2)   | C(b4)_2-C(a4)_2   | 1.453(2)   |
| Fe(1)_1-N(1)_1    | 2.0034(15) | C(b4)_2-C(41)_2   | 1.503(2)   |
| Fe(1)_1-N(4)_1    | 2.0048(14) | C(a4)_2-C(m2)_2   | 1.382(2)   |
| Fe(1)_1-N(2)_1    | 2.0050(16) | C(m2)_2-C(a5)_2   | 1.387(2)   |
| Fe(1)_1-N(3)_1    | 2.0072(16) | C(a5)_2-C(b5)_2   | 1.450(2)   |
| Fe(1)_1-N(5)_1    | 2.1469(18) | C(b5)_2-C(b6)_2   | 1.360(2)   |
| S(1)_1-C(1)_1     | 1.565(2)   | C(b5)_2-C(51)_2   | 1.500(2)   |
| N(1)_1-C(a1)_1    | 1.376(2)   | C(b6)_2-C(a6)_2   | 1.449(2)   |
| N(1)_1-C(a2)_1    | 1.378(2)   | C(b6)_2-C(61)_2   | 1.500(2)   |
| N(2)_1-C(a3)_1    | 1.374(3)   | C(a6)_2-C(m3)_2   | 1.388(2)   |
| N(2)_1-C(a4)_1    | 1.378(3)   | C(m3)_2-C(a7)_2   | 1.382(2)   |
| N(3)_1-C(a5)_1    | 1.373(2)   | C(a7)_2-C(b7)_2   | 1.455(2)   |
| N(3)_1-C(a6)_1    | 1.377(2)   | C(b7)_2-C(b8)_2   | 1.362(2)   |
| N(4)_1-C(a7)_1    | 1.376(2)   | C(b7)_2-C(71)_2   | 1.502(2)   |
| N(4)_1-C(a8)_1    | 1.379(2)   | C(b8)_2-C(a8)_2   | 1.453(2)   |
| N(5)_1-C(6)_1     | 1.3438(17) | C(b8)_2-C(81)_2   | 1.498(2)   |
| N(5)_1-C(2)_1     | 1.348(2)   | C(a8)_2-C(m4)_2   | 1.379(3)   |
| C(a2)_1-C(m1)_1   | 1.385(3)   | C(m4)_2-C(a1)_2   | 1.384(3)   |
| C(a2)_1-C(b2)_1   | 1.449(2)   | C(a1)_2-C(b1)_2   | 1.477(3)   |
| C(m1)_1-C(a3)_1   | 1.385(3)   | C(a1)_2-C(b1a)_2  | 1.484(8)   |
| C(a3)_1-C(b3a)_1  | 1.474(4)   | C(b1)_2-C(b2)_2   | 1.357(4)   |
| C(a3)_1-C(b3)_1   | 1.523(4)   | C(b1)_2-C(11)_2   | 1.492(4)   |
| C(b3)_1-C(b4)_1   | 1.354(5)   | C(b2)_2-C(21)_2   | 1.503(4)   |
| C(b3)_1-C(31)_1   | 1.530(5)   | C(11)_2-C(12)_2   | 1.529(4)   |
| C(b4)_1-C(a4)_1   | 1.466(4)   | C(21)_2-C(22)_2   | 1.527(4)   |
| C(b4)_1-C(41)_1   | 1.497(5)   | C(b1a)_2-C(b2a)_2 | 1.345(10)  |
| C(31)_1-C(32)_1   | 1.488(6)   | C(b1a)_2-C(11a)_2 | 1.559(11)  |
| C(41)_1-C(42)_1   | 1.535(6)   | C(b2a)_2-C(21a)_2 | 1.510(9)   |
| C(b3a)_1-C(b4a)_1 | 1.356(6)   | C(11a)_2-C(12a)_2 | 1.478(13)  |
| C(b3a)_1-C(41a)_1 | 1.488(6)   | C(21a)_2-C(22a)_2 | 1.519(10)  |
| C(b4a)_1-C(41a)_1 | 1.517(6)   | C(31)_2-C(31a)_2  | 1.291(5)   |
| C(b4a)_1-C(a4)_1  | 1.535(4)   | C(31)_2-C(32)_2   | 1.356(4)   |
| C(31a)_1-C(32a)_1 | 1.544(7)   | C(41)_2-C(42)_2   | 1.528(3)   |
| C(41a)_1-C(42a)_1 | 1.493(6)   | C(51)_2-C(52)_2   | 1.525(3)   |

**Table S15.** Continued...

| bond              | length (Å) | bond              | length (Å) |
|-------------------|------------|-------------------|------------|
| C(a4)_1-C(m2)_1   | 1.382(3)   | C(61)_2-C(62)_2   | 1.529(3)   |
| C(m2)_1-C(a5)_1   | 1.389(3)   | C(71)_2-C(72)_2   | 1.527(2)   |
| C(a5)_1-C(b5a)_1  | 1.440(6)   | C(81)_2-C(82)_2   | 1.524(3)   |
| C(a5)_1-C(b5)_1   | 1.500(4)   | C(2)_2-C(3)_2     | 1.378(3)   |
| C(b5)_1-C(b6)_1   | 1.366(5)   | C(3)_2-C(4)_2     | 1.379(3)   |
| C(b5)_1-C(51)_1   | 1.499(4)   | C(4)_2-C(5)_2     | 1.387(3)   |
| C(b6)_1-C(a6)_1   | 1.484(4)   | C(5)_2-C(6)_2     | 1.382(3)   |
| C(b6)_1-C(61)_1   | 1.501(5)   | Fe(1)_3-C(1)_3    | 1.889(8)   |
| C(51)_1-C(52)_1   | 1.528(4)   | Fe(1)_3-C(1)_3#1  | 1.889(8)   |
| C(61)_1-C(62)_1   | 1.529(5)   | Fe(1)_3-N(5)_3    | 1.959(3)   |
| C(b5a)_1-C(b6a)_1 | 1.359(9)   | Fe(1)_3-N(5)_3#1  | 1.959(3)   |
| C(b5a)_1-C(51a)_1 | 1.527(8)   | Fe(1)_3-N(2)_3#1  | 1.998(2)   |
| C(b6a)_1-C(a6)_1  | 1.459(6)   | Fe(1)_3-N(2)_3    | 1.998(2)   |
| C(b6a)_1-C(61a)_1 | 1.516(8)   | Fe(1)_3-N(1)_3    | 2.000(2)   |
| C(51a)_1-C(52a)_1 | 1.500(9)   | Fe(1)_3-N(1)_3#1  | 2.000(2)   |
| C(61a)_1-C(62a)_1 | 1.546(9)   | N(5)_3-C(2)_3     | 1.3677(17) |
| C(a6)_1-C(m3)_1   | 1.384(3)   | N(5)_3-C(6)_3     | 1.3679(17) |
| C(m3)_1-C(a7)_1   | 1.384(3)   | C(2)_3-C(3)_3     | 1.3678(17) |
| C(a7)_1-C(b7)_1   | 1.450(2)   | C(3)_3-C(4)_3     | 1.3679(17) |
| C(b7)_1-C(b8)_1   | 1.359(2)   | C(4)_3-C(5)_3     | 1.3677(17) |
| C(b7)_1-C(71)_1   | 1.502(2)   | C(5)_3-C(6)_3     | 1.3679(17) |
| C(b8)_1-C(a8)_1   | 1.449(2)   | S(1)_3-C(1)_3     | 1.604(8)   |
| C(b8)_1-C(81)_1   | 1.501(2)   | N(1)_3-C(a2)_3    | 1.372(2)   |
| C(a8)_1-C(m4)_1   | 1.382(2)   | N(1)_3-C(a1)_3    | 1.407(3)   |
| C(m4)_1-C(a1)_1   | 1.385(2)   | N(1)_3-C(1a)_3    | 1.418(6)   |
| C(a1)_1-C(b1)_1   | 1.453(2)   | N(2)_3-C(a3)_3    | 1.370(2)   |
| C(b1)_1-C(b2)_1   | 1.356(2)   | N(2)_3-C(9a)_3    | 1.390(11)  |
| C(b1)_1-C(11)_1   | 1.502(2)   | N(2)_3-C(a4)_3    | 1.397(6)   |
| C(b2)_1-C(21)_1   | 1.499(2)   | C(a1)_3-C(m2)_3   | 1.384(5)   |
| C(71)_1-C(72)_1   | 1.522(3)   | C(a1)_3-C(b1)_3   | 1.451(4)   |
| C(81)_1-C(82)_1   | 1.532(2)   | C(b1)_3-C(b2)_3   | 1.389(4)   |
| C(11)_1-C(12)_1   | 1.529(2)   | C(b1)_3-C(11)_3   | 1.508(4)   |
| C(21)_1-C(22)_1   | 1.520(3)   | C(m2)_3-C(a4)_3#1 | 1.384(7)   |
| C(2)_1-C(3)_1     | 1.382(3)   | C(11)_3-C(12)_3   | 1.509(5)   |

**Table S15.** Continued...

| bond             | length (Å) | bond               | length (Å) |
|------------------|------------|--------------------|------------|
| C(3)_1-C(4)_1    | 1.378(4)   | C(1a)_3-C(10b)_3   | 1.380(8)   |
| C(4)_1-C(5)_1    | 1.381(3)   | C(1a)_3-C(2a)_3    | 1.446(7)   |
| C(5)_1-C(6)_1    | 1.386(2)   | C(2a)_3-C(b2)_3    | 1.423(6)   |
| Fe(1)_2-C(1)_2   | 1.7043(18) | C(2a)_3-C(11a)_3   | 1.499(7)   |
| Fe(1)_2-N(3)_2   | 2.0039     | C(10b)_3-C(9a)_3#1 | 1.389(13)  |
| Fe(1)_2-N(2)_2   | 2.0043     | C(11a)_3-C(12a)_3  | 1.523(9)   |
| Fe(1)_2-N(1)_2   | 2.0048     | C(b2)_3-C(a2)_3    | 1.450(2)   |
| Fe(1)_2-N(4)_2   | 2.0108     | C(b2)_3-C(21)_3    | 1.497(2)   |
| Fe(1)_2-N(5)_2   | 2.1550     | C(a2)_3-C(m1)_3    | 1.377(2)   |
| S(1)_2-C(1)_2    | 1.5626(18) | C(m1)_3-C(a3)_3    | 1.387(2)   |
| N(1)_2-C(a2)_2   | 1.3734(19) | C(a3)_3-C(b3)_3    | 1.451(2)   |
| N(1)_2-C(a1)_2   | 1.3744(19) | C(b3)_3-C(8a)_3    | 1.350(17)  |
| N(2)_2-C(a3)_2   | 1.3699(17) | C(b3)_3-C(b4)_3    | 1.378(8)   |
| N(2)_2-C(a4)_2   | 1.3716(17) | C(b3)_3-C(31)_3    | 1.504(2)   |
| N(3)_2-C(a6)_2   | 1.3710(16) | C(b4)_3-C(a4)_3    | 1.425(11)  |
| N(3)_2-C(a5)_2   | 1.3754(16) | C(b4)_3-C(41)_3    | 1.485(9)   |
| N(4)_2-C(a7)_2   | 1.3739(16) | C(a4)_3-C(m2)_3#1  | 1.384(7)   |
| N(4)_2-C(a8)_2   | 1.3779(17) | C(41)_3-C(42)_3    | 1.606(11)  |
| N(5)_2-C(6)_2    | 1.3436(19) | C(8a)_3-C(9a)_3    | 1.511(18)  |
| N(5)_2-C(2)_2    | 1.3446(18) | C(8a)_3-C(41a)_3   | 1.89(2)    |
| C(a2)_2-C(m1)_2  | 1.384(3)   | C(8a)_3-C(42a)_3   | 1.98(2)    |
| C(a2)_2-C(b2a)_2 | 1.457(7)   | C(9a)_3-C(10b)_3#1 | 1.389(13)  |
| C(a2)_2-C(b2)_2  | 1.484(3)   | C(41a)_3-C(42a)_3  | 1.19(3)    |
| C(m1)_2-C(a3)_2  | 1.389(3)   | C(21)_3-C(22)_3    | 1.529(3)   |
| C(a3)_2-C(b3)_2  | 1.452(2)   | C(31)_3-C(32)_3    | 1.518(3)   |
| C(b3)_2-C(b4)_2  | 1.355(3)   |                    |            |
| C(b3)_2-C(31)_2  | 1.505(3)   |                    |            |

<sup>a</sup>The estimated standard deviations of the least significant digits are given in parentheses.

**Table S16.** Bond Angles for [Fe(OEP)(CS)(Py)]<sup>a</sup>

| angle                   | degree     | angle                    | degree     |
|-------------------------|------------|--------------------------|------------|
| C(1)_1-Fe(1)_1-N(1)_1   | 95.12(8)   | N(2)_2-C(a4)_2-C(b4)_2   | 110.59(13) |
| C(1)_1-Fe(1)_1-N(4)_1   | 91.11(7)   | C(m2)_2-C(a4)_2-C(b4)_2  | 124.50(16) |
| N(1)_1-Fe(1)_1-N(4)_1   | 89.94(6)   | C(a4)_2-C(m2)_2-C(a5)_2  | 125.85(16) |
| C(1)_1-Fe(1)_1-N(2)_1   | 92.51(8)   | N(3)_2-C(a5)_2-C(m2)_2   | 124.81(14) |
| N(1)_1-Fe(1)_1-N(2)_1   | 89.64(6)   | N(3)_2-C(a5)_2-C(b5)_2   | 110.68(13) |
| N(4)_1-Fe(1)_1-N(2)_1   | 176.38(7)  | C(m2)_2-C(a5)_2-C(b5)_2  | 124.47(15) |
| C(1)_1-Fe(1)_1-N(3)_1   | 89.60(8)   | C(b6)_2-C(b5)_2-C(a5)_2  | 106.69(15) |
| N(1)_1-Fe(1)_1-N(3)_1   | 175.27(7)  | C(b6)_2-C(b5)_2-C(51)_2  | 128.71(16) |
| N(4)_1-Fe(1)_1-N(3)_1   | 89.92(6)   | C(a5)_2-C(b5)_2-C(51)_2  | 124.59(16) |
| N(2)_1-Fe(1)_1-N(3)_1   | 90.20(7)   | C(b5)_2-C(b6)_2-C(a6)_2  | 106.24(14) |
| C(1)_1-Fe(1)_1-N(5)_1   | 177.66(8)  | C(b5)_2-C(b6)_2-C(61)_2  | 128.86(16) |
| N(1)_1-Fe(1)_1-N(5)_1   | 87.20(6)   | C(a6)_2-C(b6)_2-C(61)_2  | 124.87(15) |
| N(4)_1-Fe(1)_1-N(5)_1   | 88.67(6)   | N(3)_2-C(a6)_2-C(m3)_2   | 124.68(14) |
| N(2)_1-Fe(1)_1-N(5)_1   | 87.71(7)   | N(3)_2-C(a6)_2-C(b6)_2   | 111.17(13) |
| N(3)_1-Fe(1)_1-N(5)_1   | 88.07(7)   | C(m3)_2-C(a6)_2-C(b6)_2  | 124.13(15) |
| C(a1)_1-N(1)_1-C(a2)_1  | 105.01(14) | C(a7)_2-C(m3)_2-C(a6)_2  | 125.89(15) |
| C(a1)_1-N(1)_1-Fe(1)_1  | 127.26(11) | N(4)_2-C(a7)_2-C(m3)_2   | 124.93(14) |
| C(a2)_1-N(1)_1-Fe(1)_1  | 127.71(12) | N(4)_2-C(a7)_2-C(b7)_2   | 110.80(13) |
| C(a3)_1-N(2)_1-C(a4)_1  | 105.76(16) | C(m3)_2-C(a7)_2-C(b7)_2  | 124.26(15) |
| C(a3)_1-N(2)_1-Fe(1)_1  | 127.36(14) | C(b8)_2-C(b7)_2-C(a7)_2  | 106.38(15) |
| C(a4)_1-N(2)_1-Fe(1)_1  | 126.76(13) | C(b8)_2-C(b7)_2-C(71)_2  | 128.23(16) |
| C(a5)_1-N(3)_1-C(a6)_1  | 105.64(16) | C(a7)_2-C(b7)_2-C(71)_2  | 125.38(15) |
| C(a5)_1-N(3)_1-Fe(1)_1  | 127.30(14) | C(b7)_2-C(b8)_2-C(a8)_2  | 106.73(15) |
| C(a6)_1-N(3)_1-Fe(1)_1  | 126.83(13) | C(b7)_2-C(b8)_2-C(81)_2  | 127.99(16) |
| C(a7)_1-N(4)_1-C(a8)_1  | 105.30(14) | C(a8)_2-C(b8)_2-C(81)_2  | 125.29(16) |
| C(a7)_1-N(4)_1-Fe(1)_1  | 127.27(12) | N(4)_2-C(a8)_2-C(m4)_2   | 124.91(15) |
| C(a8)_1-N(4)_1-Fe(1)_1  | 127.03(11) | N(4)_2-C(a8)_2-C(b8)_2   | 110.58(14) |
| C(6)_1-N(5)_1-C(2)_1    | 117.21(17) | C(m4)_2-C(a8)_2-C(b8)_2  | 124.51(16) |
| C(6)_1-N(5)_1-Fe(1)_1   | 122.00(10) | C(a8)_2-C(m4)_2-C(a1)_2  | 125.68(17) |
| C(2)_1-N(5)_1-Fe(1)_1   | 120.78(15) | N(1)_2-C(a1)_2-C(m4)_2   | 124.75(16) |
| N(1)_1-C(a2)_1-C(m1)_1  | 124.38(17) | N(1)_2-C(a1)_2-C(b1)_2   | 111.21(18) |
| N(1)_1-C(a2)_1-C(b2)_1  | 110.94(15) | C(m4)_2-C(a1)_2-C(b1)_2  | 123.75(19) |
| C(m1)_1-C(a2)_1-C(b2)_1 | 124.68(17) | N(1)_2-C(a1)_2-C(b1a)_2  | 107.1(3)   |
| C(a3)_1-C(m1)_1-C(a2)_1 | 125.79(19) | C(m4)_2-C(a1)_2-C(b1a)_2 | 124.2(3)   |

**Table S16.** Continued...

| angle                      | degree     | angle                      | degree     |
|----------------------------|------------|----------------------------|------------|
| N(2)_1-C(a3)_1-C(m1)_1     | 124.82(18) | C(b1)_2-C(a1)_2-C(b1a)_2   | 26.7(3)    |
| N(2)_1-C(a3)_1-C(b3a)_1    | 112.9(2)   | C(b2)_2-C(b1)_2-C(a1)_2    | 106.0(2)   |
| C(m1)_1-C(a3)_1-C(b3a)_1   | 120.5(2)   | C(b2)_2-C(b1)_2-C(11)_2    | 128.1(3)   |
| N(2)_1-C(a3)_1-C(b3)_1     | 107.0(2)   | C(a1)_2-C(b1)_2-C(11)_2    | 125.6(3)   |
| C(m1)_1-C(a3)_1-C(b3)_1    | 125.8(2)   | C(b1)_2-C(b2)_2-C(a2)_2    | 106.5(2)   |
| C(b3a)_1-C(a3)_1-C(b3)_1   | 30.37(18)  | C(b1)_2-C(b2)_2-C(21)_2    | 128.9(3)   |
| C(b4)_1-C(b3)_1-C(a3)_1    | 108.2(3)   | C(a2)_2-C(b2)_2-C(21)_2    | 124.4(2)   |
| C(b4)_1-C(b3)_1-C(31)_1    | 129.1(3)   | C(b1)_2-C(11)_2-C(12)_2    | 114.2(3)   |
| C(a3)_1-C(b3)_1-C(31)_1    | 122.3(3)   | C(b2)_2-C(21)_2-C(22)_2    | 111.5(3)   |
| C(b3)_1-C(b4)_1-C(a4)_1    | 104.4(3)   | C(b2a)_2-C(b1a)_2-C(a1)_2  | 107.5(6)   |
| C(b3)_1-C(b4)_1-C(41)_1    | 128.0(3)   | C(b2a)_2-C(b1a)_2-C(11a)_2 | 127.5(7)   |
| C(a4)_1-C(b4)_1-C(41)_1    | 125.8(3)   | C(a1)_2-C(b1a)_2-C(11a)_2  | 124.4(6)   |
| C(32)_1-C(31)_1-C(b3)_1    | 113.6(4)   | C(b1a)_2-C(b2a)_2-C(a2)_2  | 105.7(6)   |
| C(b4)_1-C(41)_1-C(42)_1    | 113.9(4)   | C(b1a)_2-C(b2a)_2-C(21a)_2 | 128.5(7)   |
| C(b4a)_1-C(b3a)_1-C(a3)_1  | 103.5(3)   | C(a2)_2-C(b2a)_2-C(21a)_2  | 123.5(6)   |
| C(b4a)_1-C(b3a)_1-C(41a)_1 | 128.0(4)   | C(12a)_2-C(11a)_2-C(b1a)_2 | 109.1(8)   |
| C(a3)_1-C(b3a)_1-C(31a)_1  | 127.1(3)   | C(b2a)_2-C(21a)_2-C(22a)_2 | 114.2(7)   |
| C(b3a)_1-C(b4a)_1-C(41a)_1 | 128.7(4)   | C(31a)_2-C(31)_2-C(32)_2   | 116.6(3)   |
| C(b3a)_1-C(b4a)_1-C(a4)_1  | 108.8(3)   | C(31a)_2-C(31)_2-C(b3)_2   | 122.3(3)   |
| C(41a)_1-C(b4a)_1-C(a4)_1  | 122.0(3)   | C(32)_2-C(31)_2-C(b3)_2    | 120.1(3)   |
| C(b3a)_1-C(31a)_1-C(32a)_1 | 114.7(5)   | C(b4)_2-C(41)_2-C(42)_2    | 113.25(15) |
| C(42a)_1-C(41a)_1-C(b4a)_1 | 110.3(4)   | C(b5)_2-C(51)_2-C(52)_2    | 112.22(17) |
| N(2)_1-C(a4)_1-C(m2)_1     | 125.17(18) | C(b6)_2-C(61)_2-C(62)_2    | 114.04(16) |
| N(2)_1-C(a4)_1-C(b4)_1     | 112.2(2)   | C(b7)_2-C(71)_2-C(72)_2    | 113.43(15) |
| C(m2)_1-C(a4)_1-C(b4)_1    | 121.0(2)   | C(b8)_2-C(81)_2-C(82)_2    | 113.60(16) |
| N(2)_1-C(a4)_1-C(b4a)_1    | 106.6(2)   | S(1)_2-C(1)_2-Fe(1)_2      | 174.57(12) |
| C(m2)_1-C(a4)_1-C(b4a)_1   | 126.3(2)   | N(5)_2-C(2)_2-C(3)_2       | 123.27(18) |
| C(b4)_1-C(a4)_1-C(b4a)_1   | 28.41(17)  | C(2)_2-C(3)_2-C(4)_2       | 119.20(19) |
| C(a4)_1-C(m2)_1-C(a5)_1    | 125.88(19) | C(3)_2-C(4)_2-C(5)_2       | 118.46(19) |
| N(3)_1-C(a5)_1-C(m2)_1     | 124.59(19) | C(6)_2-C(5)_2-C(4)_2       | 118.8(2)   |
| N(3)_1-C(a5)_1-C(b5a)_1    | 110.1(3)   | N(5)_2-C(6)_2-C(5)_2       | 123.26(17) |
| C(m2)_1-C(a5)_1-C(b5a)_1   | 121.1(3)   | C(1)_3-Fe(1)_3-C(1)_3#1    | 180.00(14) |
| N(3)_1-C(a5)_1-C(b5)_1     | 109.9(2)   | C(1)_3#1-Fe(1)_3-N(5)_3    | 177.8(3)   |
| C(m2)_1-C(a5)_1-C(b5)_1    | 125.1(2)   |                            |            |

**Table S16.** Continued...

| angle                                                         | degree     | angle                                                         | degree     |
|---------------------------------------------------------------|------------|---------------------------------------------------------------|------------|
| C(b5a) <sub>1</sub> -C(a5) <sub>1</sub> -C(b5) <sub>1</sub>   | 27.8(3)    | C(1) <sub>3</sub> -Fe(1) <sub>3</sub> -N(5) <sub>3</sub> #1   | 177.8(3)   |
| C(b6) <sub>1</sub> -C(b5) <sub>1</sub> -C(51) <sub>1</sub>    | 127.2(3)   |                                                               |            |
| C(b6) <sub>1</sub> -C(b5) <sub>1</sub> -C(a5) <sub>1</sub>    | 106.7(3)   | N(5) <sub>3</sub> -Fe(1) <sub>3</sub> -N(5) <sub>3</sub> #1   | 180.00(18) |
| C(51) <sub>1</sub> -C(b5) <sub>1</sub> -C(a5) <sub>1</sub>    | 125.7(3)   | C(1) <sub>3</sub> -Fe(1) <sub>3</sub> -N(2) <sub>3</sub> #1   | 89.7(2)    |
| C(b5) <sub>1</sub> -C(b6) <sub>1</sub> -C(a6) <sub>1</sub>    | 105.4(3)   | C(1) <sub>3</sub> #1-Fe(1) <sub>3</sub> -N(2) <sub>3</sub> #1 | 90.3(2)    |
| C(b5) <sub>1</sub> -C(b6) <sub>1</sub> -C(61) <sub>1</sub>    | 128.4(3)   | N(5) <sub>3</sub> -Fe(1) <sub>3</sub> -N(2) <sub>3</sub> #1   | 88.51(13)  |
| C(a6) <sub>1</sub> -C(b6) <sub>1</sub> -C(61) <sub>1</sub>    | 126.0(3)   | N(5) <sub>3</sub> #1-Fe(1) <sub>3</sub> -N(2) <sub>3</sub> #1 | 91.49(13)  |
| C(b5) <sub>1</sub> -C(51) <sub>1</sub> -C(52) <sub>1</sub>    | 114.5(3)   | C(1) <sub>3</sub> -Fe(1) <sub>3</sub> -N(2) <sub>3</sub>      | 90.3(2)    |
| C(b6) <sub>1</sub> -C(61) <sub>1</sub> -C(62) <sub>1</sub>    | 111.1(3)   | C(1) <sub>3</sub> #1-Fe(1) <sub>3</sub> -N(2) <sub>3</sub>    | 89.7(2)    |
| C(b6a) <sub>1</sub> -C(b5a) <sub>1</sub> -C(a5) <sub>1</sub>  | 104.8(5)   | N(5) <sub>3</sub> -Fe(1) <sub>3</sub> -N(2) <sub>3</sub>      | 91.49(13)  |
| C(b6a) <sub>1</sub> -C(b5a) <sub>1</sub> -C(51a) <sub>1</sub> | 127.5(5)   | N(5) <sub>3</sub> #1-Fe(1) <sub>3</sub> -N(2) <sub>3</sub>    | 88.51(13)  |
| C(a5) <sub>1</sub> -C(b5a) <sub>1</sub> -C(51a) <sub>1</sub>  | 126.8(5)   | N(2) <sub>3</sub> #1-Fe(1) <sub>3</sub> -N(2) <sub>3</sub>    | 180.00(13) |
| C(b5a) <sub>1</sub> -C(b6a) <sub>1</sub> -C(a6) <sub>1</sub>  | 108.5(5)   | C(1) <sub>3</sub> -Fe(1) <sub>3</sub> -N(1) <sub>3</sub>      | 91.8(2)    |
| C(b5a) <sub>1</sub> -C(b6a) <sub>1</sub> -C(61a) <sub>1</sub> | 128.7(6)   | C(1) <sub>3</sub> #1-Fe(1) <sub>3</sub> -N(1) <sub>3</sub>    | 88.2(2)    |
| C(a6) <sub>1</sub> -C(b6a) <sub>1</sub> -C(61a) <sub>1</sub>  | 121.3(5)   | N(5) <sub>3</sub> -Fe(1) <sub>3</sub> -N(1) <sub>3</sub>      | 89.90(12)  |
| C(52a) <sub>1</sub> -C(51a) <sub>1</sub> -C(b5a) <sub>1</sub> | 110.3(6)   | N(5) <sub>3</sub> #1-Fe(1) <sub>3</sub> -N(1) <sub>3</sub>    | 90.10(12)  |
| C(b6a) <sub>1</sub> -C(61a) <sub>1</sub> -C(62a) <sub>1</sub> | 114.7(5)   | N(2) <sub>3</sub> #1-Fe(1) <sub>3</sub> -N(1) <sub>3</sub>    | 89.77(10)  |
| N(3) <sub>1</sub> -C(a6) <sub>1</sub> -C(m3) <sub>1</sub>     | 124.92(17) | N(2) <sub>3</sub> -Fe(1) <sub>3</sub> -N(1) <sub>3</sub>      | 90.23(10)  |
| N(3) <sub>1</sub> -C(a6) <sub>1</sub> -C(b6a) <sub>1</sub>    | 107.2(3)   | C(1) <sub>3</sub> -Fe(1) <sub>3</sub> -N(1) <sub>3</sub> #1   | 88.2(2)    |
| C(m3) <sub>1</sub> -C(a6) <sub>1</sub> -C(b6a) <sub>1</sub>   | 124.9(3)   | C(1) <sub>3</sub> #1-Fe(1) <sub>3</sub> -N(1) <sub>3</sub> #1 | 91.8(2)    |
| N(3) <sub>1</sub> -C(a6) <sub>1</sub> -C(b6) <sub>1</sub>     | 111.4(2)   | N(5) <sub>3</sub> -Fe(1) <sub>3</sub> -N(1) <sub>3</sub> #1   | 90.10(12)  |
| C(m3) <sub>1</sub> -C(a6) <sub>1</sub> -C(b6) <sub>1</sub>    | 123.1(2)   | N(5) <sub>3</sub> #1-Fe(1) <sub>3</sub> -N(1) <sub>3</sub> #1 | 89.90(12)  |
| C(b6a) <sub>1</sub> -C(a6) <sub>1</sub> -C(b6) <sub>1</sub>   | 25.6(2)    | N(2) <sub>3</sub> #1-Fe(1) <sub>3</sub> -N(1) <sub>3</sub> #1 | 90.23(10)  |
| C(a7) <sub>1</sub> -C(m3) <sub>1</sub> -C(a6) <sub>1</sub>    | 125.98(17) | N(2) <sub>3</sub> -Fe(1) <sub>3</sub> -N(1) <sub>3</sub> #1   | 89.77(10)  |
| N(4) <sub>1</sub> -C(a7) <sub>1</sub> -C(m3) <sub>1</sub>     | 124.47(16) | N(1) <sub>3</sub> -Fe(1) <sub>3</sub> -N(1) <sub>3</sub> #1   | 180.00(16) |
| N(4) <sub>1</sub> -C(a7) <sub>1</sub> -C(b7) <sub>1</sub>     | 110.70(15) | C(2) <sub>3</sub> -N(5) <sub>3</sub> -C(6) <sub>3</sub>       | 120.0      |
| C(m3) <sub>1</sub> -C(a7) <sub>1</sub> -C(b7) <sub>1</sub>    | 124.83(16) | C(2) <sub>3</sub> -N(5) <sub>3</sub> -Fe(1) <sub>3</sub>      | 119.61(15) |
| C(b8) <sub>1</sub> -C(b7) <sub>1</sub> -C(a7) <sub>1</sub>    | 106.67(15) | C(6) <sub>3</sub> -N(5) <sub>3</sub> -Fe(1) <sub>3</sub>      | 120.34(15) |
| C(b8) <sub>1</sub> -C(b7) <sub>1</sub> -C(71) <sub>1</sub>    | 127.09(15) | N(5) <sub>3</sub> -C(2) <sub>3</sub> -C(3) <sub>3</sub>       | 120.0      |
| C(a7) <sub>1</sub> -C(b7) <sub>1</sub> -C(71) <sub>1</sub>    | 126.24(16) | C(2) <sub>3</sub> -C(3) <sub>3</sub> -C(4) <sub>3</sub>       | 120.0      |
| C(b7) <sub>1</sub> -C(b8) <sub>1</sub> -C(a8) <sub>1</sub>    | 106.64(15) | C(5) <sub>3</sub> -C(4) <sub>3</sub> -C(3) <sub>3</sub>       | 120.0      |
| C(b7) <sub>1</sub> -C(b8) <sub>1</sub> -C(81) <sub>1</sub>    | 127.97(15) | C(4) <sub>3</sub> -C(5) <sub>3</sub> -C(6) <sub>3</sub>       | 120.0      |
| C(a8) <sub>1</sub> -C(b8) <sub>1</sub> -C(81) <sub>1</sub>    | 125.39(15) | C(5) <sub>3</sub> -C(6) <sub>3</sub> -N(5) <sub>3</sub>       | 120.0      |
| N(4) <sub>1</sub> -C(a8) <sub>1</sub> -C(m4) <sub>1</sub>     | 125.06(15) | S(1) <sub>3</sub> -C(1) <sub>3</sub> -Fe(1) <sub>3</sub>      | 175.4(5)   |



Table S16. Continued...

| angle                   | degree     | angle                      | degree     |
|-------------------------|------------|----------------------------|------------|
| N(4)_1-C(a8)_1-C(b8)_1  | 110.68(14) | C(a2)_3-N(1)_3-C(a1)_3     | 105.26(18) |
| C(m4)_1-C(a8)_1-C(b8)_1 | 124.26(15) | C(a2)_3-N(1)_3-C(1a)_3     | 104.2(3)   |
| C(a8)_1-C(m4)_1-C(a1)_1 | 125.48(16) | C(a1)_3-N(1)_3-C(1a)_3     | 29.6(2)    |
| N(1)_1-C(a1)_1-C(m4)_1  | 125.02(15) | C(a2)_3-N(1)_3-Fe(1)_3     | 127.05(13) |
| N(1)_1-C(a1)_1-C(b1)_1  | 110.84(14) | C(a1)_3-N(1)_3-Fe(1)_3     | 126.69(17) |
| C(m4)_1-C(a1)_1-C(b1)_1 | 124.13(15) | C(1a)_3-N(1)_3-Fe(1)_3     | 125.5(3)   |
| C(b2)_1-C(b1)_1-C(a1)_1 | 106.57(15) | C(a3)_3-N(2)_3-C(9a)_3     | 105.5(5)   |
| C(b2)_1-C(b1)_1-C(11)_1 | 128.68(15) | C(a3)_3-N(2)_3-C(a4)_3     | 104.8(3)   |
| C(a1)_1-C(b1)_1-C(11)_1 | 124.74(14) | C(9a)_3-N(2)_3-C(a4)_3     | 23.1(4)    |
| C(b1)_1-C(b2)_1-C(a2)_1 | 106.60(15) | C(a3)_3-N(2)_3-Fe(1)_3     | 127.09(13) |
| C(b1)_1-C(b2)_1-C(21)_1 | 128.57(16) | C(9a)_3-N(2)_3-Fe(1)_3     | 125.1(5)   |
| C(a2)_1-C(b2)_1-C(21)_1 | 124.63(16) | C(a4)_3-N(2)_3-Fe(1)_3     | 127.7(3)   |
| C(b7)_1-C(71)_1-C(72)_1 | 112.79(15) | C(m2)_3-C(a1)_3-N(1)_3     | 124.2(3)   |
| C(b8)_1-C(81)_1-C(82)_1 | 113.05(15) | C(m2)_3-C(a1)_3-C(b1)_3    | 125.2(3)   |
| C(b1)_1-C(11)_1-C(12)_1 | 113.19(15) | N(1)_3-C(a1)_3-C(b1)_3     | 110.1(3)   |
| C(b2)_1-C(21)_1-C(22)_1 | 112.03(17) | C(b2)_3-C(b1)_3-C(a1)_3    | 106.4(2)   |
| S(1)_1-C(1)_1-Fe(1)_1   | 176.24(13) | C(b2)_3-C(b1)_3-C(11)_3    | 128.2(2)   |
| N(5)_1-C(2)_1-C(3)_1    | 122.8(2)   | C(a1)_3-C(b1)_3-C(11)_3    | 125.1(3)   |
| C(4)_1-C(3)_1-C(2)_1    | 119.4(2)   | C(a1)_3-C(m2)_3-C(a4)_3#1  | 126.0(4)   |
| C(3)_1-C(4)_1-C(5)_1    | 118.6(2)   | C(b1)_3-C(11)_3-C(12)_3    | 111.8(3)   |
| C(4)_1-C(5)_1-C(6)_1    | 118.9(2)   | C(10b)_3-C(1a)_3-N(1)_3    | 123.1(5)   |
| N(5)_1-C(6)_1-C(5)_1    | 123.11(12) | C(10b)_3-C(1a)_3-C(2a)_3   | 125.3(5)   |
| C(1)_2-Fe(1)_2-N(3)_2   | 88.30(6)   | N(1)_3-C(1a)_3-C(2a)_3     | 109.7(4)   |
| C(1)_2-Fe(1)_2-N(2)_2   | 91.69(5)   | C(b2)_3-C(2a)_3-C(1a)_3    | 106.4(4)   |
| N(3)_2-Fe(1)_2-N(2)_2   | 90.1       | C(b2)_3-C(2a)_3-C(11a)_3   | 127.1(4)   |
| C(1)_2-Fe(1)_2-N(1)_2   | 95.95(6)   | C(1a)_3-C(2a)_3-C(11a)_3   | 125.0(5)   |
| N(3)_2-Fe(1)_2-N(1)_2   | 175.7      | C(1a)_3-C(10b)_3-C(9a)_3#1 | 125.4(7)   |
| N(2)_2-Fe(1)_2-N(1)_2   | 90.2       | C(2a)_3-C(11a)_3-C(12a)_3  | 116.4(5)   |
| C(1)_2-Fe(1)_2-N(4)_2   | 91.59(5)   | C(b1)_3-C(b2)_3-C(2a)_3    | 32.4(2)    |
| N(3)_2-Fe(1)_2-N(4)_2   | 90.0       | C(b1)_3-C(b2)_3-C(a2)_3    | 106.18(18) |
| N(2)_2-Fe(1)_2-N(4)_2   | 176.7      | C(2a)_3-C(b2)_3-C(a2)_3    | 103.7(2)   |
| N(1)_2-Fe(1)_2-N(4)_2   | 89.5       | C(b1)_3-C(b2)_3-C(21)_3    | 127.49(19) |
| C(1)_2-Fe(1)_2-N(5)_2   | 176.94(6)  | C(2a)_3-C(b2)_3-C(21)_3    | 127.2(2)   |
| N(3)_2-Fe(1)_2-N(5)_2   | 89.2       | C(a2)_3-C(b2)_3-C(21)_3    | 125.06(17) |

**Table S16.** Continued...

| angle                                                       | degree     | angle                                                         | degree     |
|-------------------------------------------------------------|------------|---------------------------------------------------------------|------------|
| N(2) <sub>2</sub> -Fe(1) <sub>2</sub> -N(5) <sub>2</sub>    | 86.6       | N(1) <sub>3</sub> -C(a2) <sub>3</sub> -C(m1) <sub>3</sub>     | 125.00(15) |
| N(1) <sub>2</sub> -Fe(1) <sub>2</sub> -N(5) <sub>2</sub>    | 86.6       | N(1) <sub>3</sub> -C(a2) <sub>3</sub> -C(b2) <sub>3</sub>     | 111.04(16) |
| N(4) <sub>2</sub> -Fe(1) <sub>2</sub> -N(5) <sub>2</sub>    | 90.2       | C(m1) <sub>3</sub> -C(a2) <sub>3</sub> -C(b2) <sub>3</sub>    | 123.96(16) |
| C(a2) <sub>2</sub> -N(1) <sub>2</sub> -C(a1) <sub>2</sub>   | 105.33(12) | C(a2) <sub>3</sub> -C(m1) <sub>3</sub> -C(a3) <sub>3</sub>    | 125.75(16) |
| C(a2) <sub>2</sub> -N(1) <sub>2</sub> -Fe(1) <sub>2</sub>   | 127.02(8)  | N(2) <sub>3</sub> -C(a3) <sub>3</sub> -C(m1) <sub>3</sub>     | 124.86(16) |
| C(a1) <sub>2</sub> -N(1) <sub>2</sub> -Fe(1) <sub>2</sub>   | 127.64(8)  | N(2) <sub>3</sub> -C(a3) <sub>3</sub> -C(b3) <sub>3</sub>     | 111.04(15) |
| C(a3) <sub>2</sub> -N(2) <sub>2</sub> -C(a4) <sub>2</sub>   | 105.55(10) | C(m1) <sub>3</sub> -C(a3) <sub>3</sub> -C(b3) <sub>3</sub>    | 124.09(16) |
| C(a3) <sub>2</sub> -N(2) <sub>2</sub> -Fe(1) <sub>2</sub>   | 127.28(7)  | C(8a) <sub>3</sub> -C(b3) <sub>3</sub> -C(b4) <sub>3</sub>    | 20.7(6)    |
| C(a4) <sub>2</sub> -N(2) <sub>2</sub> -Fe(1) <sub>2</sub>   | 127.05(7)  | C(8a) <sub>3</sub> -C(b3) <sub>3</sub> -C(a3) <sub>3</sub>    | 106.3(6)   |
| C(a6) <sub>2</sub> -N(3) <sub>2</sub> -C(a5) <sub>2</sub>   | 105.19(10) | C(b4) <sub>3</sub> -C(b3) <sub>3</sub> -C(a3) <sub>3</sub>    | 105.8(4)   |
| C(a6) <sub>2</sub> -N(3) <sub>2</sub> -Fe(1) <sub>2</sub>   | 127.11(7)  | C(8a) <sub>3</sub> -C(b3) <sub>3</sub> -C(31) <sub>3</sub>    | 126.2(6)   |
| C(a5) <sub>2</sub> -N(3) <sub>2</sub> -Fe(1) <sub>2</sub>   | 126.83(7)  | C(b4) <sub>3</sub> -C(b3) <sub>3</sub> -C(31) <sub>3</sub>    | 129.1(4)   |
| C(a7) <sub>2</sub> -N(4) <sub>2</sub> -C(a8) <sub>2</sub>   | 105.51(10) | C(a3) <sub>3</sub> -C(b3) <sub>3</sub> -C(31) <sub>3</sub>    | 125.00(16) |
| C(a7) <sub>2</sub> -N(4) <sub>2</sub> -Fe(1) <sub>2</sub>   | 126.68(7)  | C(b3) <sub>3</sub> -C(b4) <sub>3</sub> -C(a4) <sub>3</sub>    | 107.1(6)   |
| C(a8) <sub>2</sub> -N(4) <sub>2</sub> -Fe(1) <sub>2</sub>   | 127.10(7)  | C(b3) <sub>3</sub> -C(b4) <sub>3</sub> -C(41) <sub>3</sub>    | 126.5(6)   |
| C(6) <sub>2</sub> -N(5) <sub>2</sub> -C(2) <sub>2</sub>     | 116.98(12) | C(a4) <sub>3</sub> -C(b4) <sub>3</sub> -C(41) <sub>3</sub>    | 126.0(7)   |
| C(6) <sub>2</sub> -N(5) <sub>2</sub> -Fe(1) <sub>2</sub>    | 121.74(8)  | C(m2) <sub>3</sub> #1-C(a4) <sub>3</sub> -N(2) <sub>3</sub>   | 124.1(5)   |
| C(2) <sub>2</sub> -N(5) <sub>2</sub> -Fe(1) <sub>2</sub>    | 121.26(9)  | C(m2) <sub>3</sub> #1-C(a4) <sub>3</sub> -C(b4) <sub>3</sub>  | 124.8(6)   |
| N(1) <sub>2</sub> -C(a2) <sub>2</sub> -C(m1) <sub>2</sub>   | 124.89(17) | N(2) <sub>3</sub> -C(a4) <sub>3</sub> -C(b4) <sub>3</sub>     | 110.7(5)   |
| N(1) <sub>2</sub> -C(a2) <sub>2</sub> -C(b2a) <sub>2</sub>  | 109.3(3)   | C(b4) <sub>3</sub> -C(41) <sub>3</sub> -C(42) <sub>3</sub>    | 114.9(5)   |
| C(m1) <sub>2</sub> -C(a2) <sub>2</sub> -C(b2a) <sub>2</sub> | 121.1(3)   | C(b3) <sub>3</sub> -C(8a) <sub>3</sub> -C(9a) <sub>3</sub>    | 106.5(11)  |
| N(1) <sub>2</sub> -C(a2) <sub>2</sub> -C(b2) <sub>2</sub>   | 110.53(18) | C(b3) <sub>3</sub> -C(8a) <sub>3</sub> -C(41a) <sub>3</sub>   | 132.1(10)  |
| C(m1) <sub>2</sub> -C(a2) <sub>2</sub> -C(b2) <sub>2</sub>  | 124.3(2)   | C(9a) <sub>3</sub> -C(8a) <sub>3</sub> -C(41a) <sub>3</sub>   | 120.0(11)  |
| C(b2a) <sub>2</sub> -C(a2) <sub>2</sub> -C(b2) <sub>2</sub> | 27.9(3)    | C(b3) <sub>3</sub> -C(8a) <sub>3</sub> -C(42a) <sub>3</sub>   | 124.4(11)  |
| C(a2) <sub>2</sub> -C(m1) <sub>2</sub> -C(a3) <sub>2</sub>  | 125.92(18) | C(9a) <sub>3</sub> -C(8a) <sub>3</sub> -C(42a) <sub>3</sub>   | 121.1(12)  |
| N(2) <sub>2</sub> -C(a3) <sub>2</sub> -C(m1) <sub>2</sub>   | 124.64(15) | C(41a) <sub>3</sub> -C(8a) <sub>3</sub> -C(42a) <sub>3</sub>  | 35.6(8)    |
| N(2) <sub>2</sub> -C(a3) <sub>2</sub> -C(b3) <sub>2</sub>   | 110.73(14) | C(10b) <sub>3</sub> #1-C(9a) <sub>3</sub> -N(2) <sub>3</sub>  | 126.0(9)   |
| C(m1) <sub>2</sub> -C(a3) <sub>2</sub> -C(b3) <sub>2</sub>  | 124.63(17) | C(10b) <sub>3</sub> #1-C(9a) <sub>3</sub> -C(8a) <sub>3</sub> | 125.4(11)  |
| C(b4) <sub>2</sub> -C(b3) <sub>2</sub> -C(a3) <sub>2</sub>  | 106.54(15) | N(2) <sub>3</sub> -C(9a) <sub>3</sub> -C(8a) <sub>3</sub>     | 108.1(10)  |
| C(b4) <sub>2</sub> -C(b3) <sub>2</sub> -C(31) <sub>2</sub>  | 128.17(17) | C(42a) <sub>3</sub> -C(41a) <sub>3</sub> -C(8a) <sub>3</sub>  | 76.2(14)   |
| C(a3) <sub>2</sub> -C(b3) <sub>2</sub> -C(31) <sub>2</sub>  | 125.29(17) | C(41a) <sub>3</sub> -C(42a) <sub>3</sub> -C(8a) <sub>3</sub>  | 68.2(16)   |
| C(b3) <sub>2</sub> -C(b4) <sub>2</sub> -C(a4) <sub>2</sub>  | 106.59(15) | C(b2) <sub>3</sub> -C(21) <sub>3</sub> -C(22) <sub>3</sub>    | 112.51(17) |
| C(b3) <sub>2</sub> -C(b4) <sub>2</sub> -C(41) <sub>2</sub>  | 128.98(16) | C(b3) <sub>3</sub> -C(31) <sub>3</sub> -C(32) <sub>3</sub>    | 113.93(17) |
| C(a4) <sub>2</sub> -C(b4) <sub>2</sub> -C(41) <sub>2</sub>  | 124.44(16) | N(2) <sub>2</sub> -C(a4) <sub>2</sub> -C(m2) <sub>2</sub>     | 124.89(14) |

<sup>a</sup>The estimated standard deviations of the least significant digits are given in parentheses.

**Table S17.** Anisotropic Displacement Parameters ( $\text{\AA}^2$ ) for  $[\text{Fe}(\text{OEP})(\text{CS})(\text{Py})]^a$ 

| atom     | $U_{11}$   | $U_{22}$   | $U_{33}$   | $U_{23}$    | $U_{13}$    | $U_{12}$    |
|----------|------------|------------|------------|-------------|-------------|-------------|
| Fe(1)_1  | 0.0362(2)  | 0.0219(1)  | 0.0242(1)  | -0.0122(1)  | 0.0089(1)   | -0.0127(1)  |
| S(1)_1   | 0.0358(3)  | 0.0385(3)  | 0.0469(3)  | -0.0221(2)  | 0.0087(2)   | -0.0139(2)  |
| N(1)_1   | 0.0299(8)  | 0.0228(7)  | 0.0237(7)  | -0.0124(6)  | 0.0063(6)   | -0.0110(6)  |
| N(2)_1   | 0.0599(12) | 0.0257(8)  | 0.0315(9)  | -0.0165(7)  | 0.0190(8)   | -0.0211(8)  |
| N(3)_1   | 0.0460(10) | 0.0233(8)  | 0.0304(9)  | -0.0127(7)  | 0.0116(7)   | -0.0128(7)  |
| N(4)_1   | 0.0274(7)  | 0.0221(7)  | 0.0210(7)  | -0.0099(6)  | 0.0031(6)   | -0.0087(6)  |
| N(5)_1   | 0.0379(9)  | 0.0191(7)  | 0.0302(8)  | -0.0059(6)  | 0.0064(7)   | -0.0054(6)  |
| C(a2)_1  | 0.0371(10) | 0.0272(9)  | 0.0260(9)  | -0.0140(7)  | 0.0064(7)   | -0.0135(8)  |
| C(m1)_1  | 0.0831(18) | 0.0349(11) | 0.0294(11) | -0.0215(9)  | 0.0240(11)  | -0.0297(11) |
| C(a3)_1  | 0.102(2)   | 0.0353(12) | 0.0397(13) | -0.0268(10) | 0.0338(13)  | -0.0374(13) |
| C(b3)_1  | 0.035(2)   | 0.0185(17) | 0.0262(19) | -0.0127(14) | -0.0057(17) | 0.0004(16)  |
| C(b4)_1  | 0.0221(19) | 0.0204(17) | 0.0268(19) | -0.0109(14) | -0.0056(15) | -0.0007(15) |
| C(31)_1  | 0.044(2)   | 0.0236(18) | 0.037(2)   | -0.0132(16) | -0.007(2)   | -0.0031(17) |
| C(32)_1  | 0.050(3)   | 0.054(3)   | 0.044(3)   | -0.024(3)   | -0.009(2)   | 0.001(2)    |
| C(31)_1  | 0.032(2)   | 0.0100(18) | 0.029(2)   | -0.0082(15) | -0.0017(17) | 0.0069(16)  |
| C(42)_1  | 0.034(2)   | 0.0162(16) | 0.036(2)   | -0.0090(14) | -0.0025(16) | -0.0104(15) |
| C(b3a)_1 | 0.031(2)   | 0.0223(19) | 0.028(2)   | -0.0100(15) | -0.0046(17) | -0.0045(16) |
| C(b4a)_1 | 0.028(2)   | 0.0205(19) | 0.031(2)   | -0.0122(16) | -0.0034(17) | -0.0047(16) |
| C(31a)_1 | 0.062(4)   | 0.031(2)   | 0.029(2)   | -0.020(2)   | 0.003(2)    | -0.021(2)   |
| C(32a)_1 | 0.074(4)   | 0.043(3)   | 0.038(3)   | -0.029(2)   | 0.033(3)    | -0.019(2)   |
| C(41a)_1 | 0.036(3)   | 0.027(2)   | 0.033(2)   | -0.0107(17) | -0.008(2)   | 0.005(2)    |
| C(42a)_1 | 0.036(3)   | 0.034(3)   | 0.048(3)   | -0.011(2)   | -0.003(2)   | -0.012(2)   |
| C(a4)_1  | 0.0848(18) | 0.0278(10) | 0.0440(13) | -0.0231(10) | 0.0307(12)  | -0.0281(11) |
| C(m2)_1  | 0.0846(18) | 0.0247(10) | 0.0439(13) | -0.0175(9)  | 0.0294(12)  | -0.0257(11) |
| C(a5)_1  | 0.0724(16) | 0.0263(10) | 0.0365(12) | -0.0123(9)  | 0.0247(11)  | -0.0211(10) |
| C(b5)_1  | 0.0252(16) | 0.0273(15) | 0.0229(16) | -0.0040(12) | -0.0045(12) | -0.0063(13) |
| C(b6)_1  | 0.0259(17) | 0.0253(15) | 0.0207(15) | -0.0049(12) | -0.0050(13) | -0.0072(14) |
| C(51)_1  | 0.0347(18) | 0.0175(15) | 0.0289(16) | -0.0037(12) | -0.0015(13) | -0.0028(13) |
| C(52)_1  | 0.0409(19) | 0.0245(15) | 0.062(2)   | -0.0096(15) | 0.0019(17)  | -0.0146(14) |
| C(61)_1  | 0.031(2)   | 0.0286(16) | 0.029(2)   | -0.0053(13) | 0.0001(16)  | -0.0091(15) |
| C(62)_1  | 0.055(2)   | 0.048(2)   | 0.0361(18) | -0.0111(16) | -0.0050(17) | -0.0164(18) |
| C(b5a)_1 | 0.038(4)   | 0.025(3)   | 0.022(3)   | -0.007(2)   | 0.003(3)    | -0.011(3)   |
| C(b6a)_1 | 0.026(3)   | 0.028(3)   | 0.021(3)   | -0.005(2)   | -0.003(2)   | -0.008(3)   |
| C(51a)_1 | 0.045(4)   | 0.033(3)   | 0.028(3)   | -0.010(2)   | -0.003(3)   | -0.012(3)   |

**Table S17.** Continued...

| atom     | $U_{11}$   | $U_{22}$   | $U_{33}$   | $U_{23}$    | $U_{13}$    | $U_{12}$   |
|----------|------------|------------|------------|-------------|-------------|------------|
| C(52a)_1 | 0.057(4)   | 0.032(4)   | 0.044(4)   | -0.012(3)   | -0.011(3)   | -0.012(3)  |
| C(61a)_1 | 0.023(3)   | 0.023(3)   | 0.029(3)   | -0.009(2)   | 0.021(3)    | -0.006(2)  |
| C(62a)_1 | 0.051(4)   | 0.053(4)   | 0.021(3)   | -0.020(3)   | 0.006(3)    | -0.022(3)  |
| C(a6)_1  | 0.0542(13) | 0.0287(10) | 0.0279(10) | -0.0110(8)  | 0.0166(9)   | -0.0159(9) |
| C(m3)_1  | 0.0412(11) | 0.0289(9)  | 0.0242(9)  | -0.0132(8)  | 0.0102(8)   | -0.0118(8) |
| C(a7)_1  | 0.0265(9)  | 0.0259(9)  | 0.0234(8)  | -0.0116(7)  | 0.0015(7)   | -0.0077(7) |
| C(b7)_1  | 0.0219(8)  | 0.0262(8)  | 0.0245(8)  | -0.0134(7)  | 0.0002(6)   | -0.0070(7) |
| C(b8)_1  | 0.0205(8)  | 0.0249(8)  | 0.0234(8)  | -0.0125(7)  | 0.0000(6)   | -0.0066(6) |
| C(a8)_1  | 0.0211(8)  | 0.0220(8)  | 0.0243(8)  | -0.0115(7)  | -0.0020(6)  | -0.0062(6) |
| C(m4)_1  | 0.0219(8)  | 0.0219(8)  | 0.0225(8)  | -0.0089(6)  | -0.0012(6)  | -0.0071(6) |
| C(a1)_1  | 0.0215(8)  | 0.0219(8)  | 0.0224(8)  | -0.0091(6)  | -0.0008(6)  | -0.0073(6) |
| C(b1)_1  | 0.0209(8)  | 0.0248(8)  | 0.0203(8)  | -0.0090(6)  | 0.0001(6)   | -0.0071(6) |
| C(b2)_1  | 0.0268(9)  | 0.0265(9)  | 0.0244(9)  | -0.0116(7)  | 0.0028(7)   | -0.0094(7) |
| C(71)_1  | 0.0283(9)  | 0.0267(9)  | 0.0233(8)  | -0.0126(7)  | 0.0042(7)   | -0.0086(7) |
| C(72)_1  | 0.0374(11) | 0.0490(12) | 0.0256(10) | -0.0173(9)  | -0.0021(8)  | -0.0108(9) |
| C(81)_1  | 0.0256(8)  | 0.0242(8)  | 0.0245(8)  | -0.0133(7)  | 0.0013(7)   | -0.0078(7) |
| C(82)_1  | 0.0301(9)  | 0.0308(9)  | 0.0290(9)  | -0.0140(8)  | 0.0015(7)   | -0.0131(7) |
| C(11)_1  | 0.0273(9)  | 0.0247(8)  | 0.0194(8)  | -0.0076(6)  | -0.0005(6)  | -0.0089(7) |
| C(12)_1  | 0.0298(9)  | 0.0307(9)  | 0.0305(10) | -0.0088(8)  | -0.0011(7)  | -0.0138(8) |
| C(21)_1  | 0.0410(11) | 0.0289(9)  | 0.0232(9)  | -0.0125(7)  | 0.0060(8)   | -0.0127(8) |
| C(22)_1  | 0.0460(13) | 0.0470(13) | 0.0370(12) | -0.0108(10) | 0.0145(10)  | 0.0041(10) |
| C(1)_1   | 0.0427(11) | 0.0252(9)  | 0.0248(9)  | -0.0142(7)  | 0.0108(8)   | -0.0175(8) |
| C(2)_1   | 0.0421(12) | 0.0249(9)  | 0.0402(12) | -0.0095(8)  | 0.0101(9)   | -0.0060(8) |
| C(3)_1   | 0.0428(12) | 0.0296(11) | 0.0503(14) | -0.0065(10) | 0.0136(10)  | -0.0039(9) |
| C(4)_1   | 0.0393(12) | 0.0272(10) | 0.0544(15) | 0.0045(9)   | 0.0001(10)  | -0.0023(9) |
| C(5)_1   | 0.0442(12) | 0.0296(10) | 0.0410(12) | 0.0036(9)   | -0.0039(10) | -0.0036(9) |
| C(6)_1   | 0.0422(11) | 0.0256(9)  | 0.0319(10) | -0.0032(8)  | 0.0032(8)   | -0.0053(8) |
| Fe(1)_2  | 0.0244(1)  | 0.0190(1)  | 0.0162(1)  | -0.0063(1)  | -0.0011(1)  | -0.0074(1) |
| S(1)_2   | 0.0268(2)  | 0.0438(3)  | 0.0362(3)  | -0.0163(2)  | -0.0066(2)  | -0.0038(2) |
| N(1)_2   | 0.0405(9)  | 0.0234(7)  | 0.0212(7)  | -0.0080(6)  | 0.0014(6)   | -0.0139(6) |
| N(2)_2   | 0.0247(7)  | 0.0222(7)  | 0.0183(7)  | -0.0080(5)  | -0.0015(5)  | -0.0059(6) |
| N(3)_2   | 0.0229(7)  | 0.0197(7)  | 0.0172(7)  | -0.0065(5)  | -0.0018(5)  | -0.0056(5) |
| N(4)_2   | 0.0278(7)  | 0.0222(7)  | 0.0167(7)  | -0.0066(5)  | -0.0014(5)  | -0.0093(6) |
| N(5)_2   | 0.0315(8)  | 0.0184(7)  | 0.0227(7)  | -0.0069(6)  | -0.0065(6)  | -0.0051(6) |

**Table S17.** Continued...

| atom     | $U_{11}$   | $U_{22}$   | $U_{33}$   | $U_{23}$    | $U_{13}$    | $U_{12}$    |
|----------|------------|------------|------------|-------------|-------------|-------------|
| C(a2)_2  | 0.0632(14) | 0.0275(10) | 0.0301(10) | -0.0124(8)  | 0.0080(9)   | -0.0219(10) |
| C(m1)_2  | 0.0626(14) | 0.0272(10) | 0.0322(11) | -0.0168(8)  | 0.0082(9)   | -0.0187(9)  |
| C(a3)_2  | 0.0329(9)  | 0.0262(9)  | 0.0240(9)  | -0.0127(7)  | 0.0011(7)   | -0.0090(7)  |
| C(b3)_2  | 0.0379(10) | 0.0306(9)  | 0.0253(9)  | -0.0151(8)  | 0.0022(8)   | -0.0084(8)  |
| C(b4)_2  | 0.0255(8)  | 0.0286(9)  | 0.0203(8)  | -0.0118(7)  | -0.0011(6)  | -0.0035(7)  |
| C(a4)_2  | 0.0217(8)  | 0.0245(8)  | 0.0188(8)  | -0.0079(6)  | -0.0033(6)  | -0.0025(6)  |
| C(m2)_2  | 0.0263(8)  | 0.0236(8)  | 0.0167(8)  | -0.0045(6)  | -0.0014(6)  | -0.0029(7)  |
| C(a5)_2  | 0.0231(8)  | 0.0210(8)  | 0.0187(8)  | -0.0038(6)  | -0.0023(6)  | -0.0056(6)  |
| C(b5)_2  | 0.0264(8)  | 0.0204(8)  | 0.0221(8)  | -0.0043(6)  | -0.0042(7)  | -0.0049(6)  |
| C(b6)_2  | 0.0267(8)  | 0.0201(8)  | 0.0216(8)  | -0.0057(6)  | -0.0043(6)  | -0.0055(6)  |
| C(a6)_2  | 0.0227(8)  | 0.0193(8)  | 0.0204(8)  | -0.0069(6)  | -0.0036(6)  | -0.0046(6)  |
| C(m3)_2  | 0.0261(8)  | 0.0210(8)  | 0.0209(8)  | -0.0097(6)  | -0.0034(6)  | -0.0043(6)  |
| C(a7)_2  | 0.0239(8)  | 0.0230(8)  | 0.0187(8)  | -0.0087(6)  | -0.0024(6)  | -0.0056(6)  |
| C(b7)_2  | 0.0253(8)  | 0.0297(9)  | 0.0189(8)  | -0.0100(7)  | -0.0011(6)  | -0.0085(7)  |
| C(b8)_2  | 0.0289(9)  | 0.0307(9)  | 0.0195(8)  | -0.0096(7)  | -0.0001(7)  | -0.0117(7)  |
| C(a8)_2  | 0.0317(9)  | 0.0284(9)  | 0.0184(8)  | -0.0075(7)  | 0.0006(7)   | -0.0123(7)  |
| C(m4)_2  | 0.0494(12) | 0.0294(9)  | 0.0202(9)  | -0.0069(7)  | 0.0058(8)   | -0.0199(9)  |
| C(a1)_2  | 0.0571(13) | 0.0271(9)  | 0.0247(9)  | -0.0066(8)  | 0.0063(9)   | -0.0230(9)  |
| C(b1)_2  | 0.0355(17) | 0.0203(13) | 0.0237(14) | 0.0005(10)  | -0.0122(12) | -0.0107(12) |
| C(b2)_2  | 0.0347(16) | 0.0192(13) | 0.0296(14) | -0.0020(10) | -0.0126(13) | -0.0091(12) |
| C(11)_2  | 0.050(2)   | 0.0217(14) | 0.0233(15) | 0.0030(11)  | -0.0108(15) | -0.0175(13) |
| C(12)_2  | 0.0426(18) | 0.0331(15) | 0.0314(16) | -0.0024(12) | 0.0034(13)  | -0.0177(13) |
| C(21)_2  | 0.0400(18) | 0.0208(13) | 0.0390(16) | -0.0037(12) | -0.0145(15) | -0.0067(13) |
| C(22)_2  | 0.0557(19) | 0.0253(14) | 0.0472(18) | -0.0086(13) | -0.0226(15) | -0.0082(13) |
| C(b1a)_2 | 0.030(4)   | 0.021(3)   | 0.019(4)   | -0.003(3)   | -0.005(3)   | -0.002(3)   |
| C(b2a)_2 | 0.029(4)   | 0.018(3)   | 0.024(4)   | -0.007(3)   | -0.003(3)   | -0.004(3)   |
| C(11a)_2 | 0.040(5)   | 0.028(4)   | 0.033(4)   | -0.015(3)   | -0.009(4)   | -0.005(4)   |
| C(12a)_2 | 0.051(6)   | 0.043(6)   | 0.062(7)   | -0.003(5)   | -0.009(6)   | -0.017(5)   |
| C(21a)_2 | 0.029(4)   | 0.019(3)   | 0.025(3)   | -0.011(3)   | 0.001(3)    | -0.009(3)   |
| C(22a)_2 | 0.030(4)   | 0.022(3)   | 0.037(4)   | -0.013(3)   | 0.010(3)    | -0.004(3)   |
| C(31)_2  | 0.0884(19) | 0.0379(12) | 0.0287(11) | -0.0205(9)  | 0.0178(11)  | -0.0301(12) |
| C(32)_2  | 0.0320(19) | 0.0236(17) | 0.039(2)   | -0.0215(16) | -0.0057(16) | 0.0006(14)  |
| C(31a)_2 | 0.054(3)   | 0.040(2)   | 0.059(3)   | -0.027(2)   | -0.017(2)   | -0.001(2)   |
| C(41)_2  | 0.0322(10) | 0.0309(9)  | 0.0223(9)  | -0.0140(7)  | 0.0031(7)   | -0.0045(7)  |

**Table S17.** Continued...

| atom     | $U_{11}$   | $U_{22}$   | $U_{33}$   | $U_{23}$    | $U_{13}$    | $U_{12}$    |
|----------|------------|------------|------------|-------------|-------------|-------------|
| C(42)_2  | 0.0422(11) | 0.0409(11) | 0.0216(9)  | -0.0118(8)  | -0.0030(8)  | -0.0015(9)  |
| C(51)_2  | 0.0432(11) | 0.0237(9)  | 0.0225(9)  | -0.0037(7)  | -0.0004(8)  | -0.0085(8)  |
| C(52)_2  | 0.0492(14) | 0.0596(15) | 0.0331(12) | -0.0008(11) | 0.0076(10)  | -0.0236(12) |
| C(61)_2  | 0.0390(10) | 0.0210(8)  | 0.0239(9)  | -0.0067(7)  | -0.0025(7)  | -0.0082(7)  |
| C(62)_2  | 0.0550(14) | 0.0380(12) | 0.0557(14) | -0.0268(11) | -0.0148(11) | -0.0094(10) |
| C(71)_2  | 0.0300(9)  | 0.0288(9)  | 0.0204(8)  | -0.0115(7)  | 0.0013(7)   | -0.0067(7)  |
| C(72)_2  | 0.0329(10) | 0.0266(9)  | 0.0263(9)  | -0.0123(7)  | -0.0007(7)  | -0.0089(7)  |
| C(81)_2  | 0.0391(11) | 0.0362(10) | 0.0206(9)  | -0.0101(8)  | 0.0052(7)   | -0.0171(8)  |
| C(82)_2  | 0.0469(12) | 0.0396(11) | 0.0205(9)  | -0.0059(8)  | 0.0027(8)   | -0.0188(9)  |
| C(1)_2   | 0.0292(9)  | 0.0258(8)  | 0.0179(8)  | -0.0098(6)  | 0.0035(6)   | -0.0120(7)  |
| C(2)_2   | 0.0456(11) | 0.0229(9)  | 0.0243(9)  | -0.0081(7)  | -0.0110(8)  | -0.0012(8)  |
| C(3)_2   | 0.0568(14) | 0.0281(10) | 0.0336(11) | -0.0117(8)  | -0.0232(10) | 0.0053(9)   |
| C(4)_2   | 0.0417(12) | 0.0338(11) | 0.0505(13) | -0.0189(10) | -0.0252(10) | 0.0046(9)   |
| C(5)_2   | 0.0317(10) | 0.0331(10) | 0.0447(12) | -0.0120(9)  | -0.0101(9)  | -0.0054(8)  |
| C(6)_2   | 0.0314(9)  | 0.0248(9)  | 0.0289(9)  | -0.0050(7)  | -0.0082(7)  | -0.0058(7)  |
| Fe(1)_3  | 0.0915(4)  | 0.0180(2)  | 0.0210(2)  | -0.0092(2)  | 0.0200(2)   | -0.0159(2)  |
| N(5)_3   | 0.042(4)   | 0.012(4)   | 0.010(3)   | -0.002(2)   | -0.006(3)   | -0.009(3)   |
| C(2)_3   | 0.047(2)   | 0.0215(17) | 0.0224(18) | -0.0079(14) | -0.0023(16) | -0.0083(15) |
| C(3)_3   | 0.060(3)   | 0.0274(19) | 0.0209(18) | -0.0041(15) | -0.0129(18) | -0.0146(18) |
| C(4)_3   | 0.042(2)   | 0.0242(18) | 0.034(2)   | -0.0017(15) | -0.0069(17) | -0.0107(16) |
| C(5)_3   | 0.041(2)   | 0.0227(17) | 0.0258(18) | -0.0035(14) | 0.0008(16)  | -0.0067(15) |
| C(6)_3   | 0.043(2)   | 0.0208(16) | 0.0198(17) | -0.0036(13) | 0.0005(15)  | -0.0065(15) |
| S(1)_3   | 0.0391(6)  | 0.0387(6)  | 0.0798(10) | 0.0160(6)   | -0.0109(6)  | -0.0150(5)  |
| C(1)_3   | 0.039(5)   | 0.025(6)   | 0.050(6)   | -0.002(4)   | 0.023(4)    | 0.000(4)    |
| N(1)_3   | 0.0629(12) | 0.0202(7)  | 0.0206(8)  | -0.0087(6)  | 0.0119(7)   | -0.0105(7)  |
| N(2)_3   | 0.0528(10) | 0.0190(7)  | 0.0206(7)  | -0.0078(6)  | 0.0083(7)   | -0.0092(7)  |
| C(a1)_3  | 0.0382(19) | 0.0224(15) | 0.0213(15) | -0.0120(11) | 0.0046(15)  | -0.0070(15) |
| C(b1)_3  | 0.0324(17) | 0.0234(14) | 0.0251(15) | -0.0127(11) | 0.0025(13)  | -0.0070(13) |
| C(m2)_3  | 0.056(2)   | 0.0239(15) | 0.0182(14) | -0.0091(12) | 0.0055(16)  | -0.0093(16) |
| C(11)_3  | 0.0405(18) | 0.0257(14) | 0.0261(16) | -0.0125(12) | 0.0014(13)  | -0.0066(12) |
| C(12)_3  | 0.042(2)   | 0.056(2)   | 0.039(2)   | -0.0249(18) | 0.0030(17)  | -0.0075(17) |
| C(1a)_3  | 0.028(3)   | 0.019(2)   | 0.022(3)   | -0.0070(19) | 0.000(2)    | -0.001(2)   |
| C(2a)_3  | 0.020(3)   | 0.021(2)   | 0.026(3)   | -0.0118(19) | -0.003(2)   | 0.001(2)    |
| C(10b)_3 | 0.052(4)   | 0.023(3)   | 0.019(3)   | -0.010(2)   | 0.009(3)    | -0.001(3)   |

**Table S17.** Continued...

| atom     | $U_{11}$   | $U_{22}$   | $U_{33}$   | $U_{23}$    | $U_{13}$   | $U_{12}$    |
|----------|------------|------------|------------|-------------|------------|-------------|
| C(11a)_3 | 0.032(3)   | 0.024(3)   | 0.023(3)   | -0.014(2)   | 0.013(2)   | 0.000(2)    |
| C(12a)_3 | 0.067(5)   | 0.059(4)   | 0.025(3)   | -0.023(3)   | -0.005(3)  | 0.013(4)    |
| C(b2)_3  | 0.0566(13) | 0.0212(9)  | 0.0265(10) | -0.0113(7)  | 0.0079(9)  | -0.0074(8)  |
| C(a2)_3  | 0.0317(9)  | 0.0191(8)  | 0.0245(9)  | -0.0093(7)  | 0.0016(7)  | -0.0043(7)  |
| C(m1)_3  | 0.0243(8)  | 0.0176(7)  | 0.0236(8)  | -0.0063(6)  | -0.0021(6) | -0.0027(6)  |
| C(a3)_3  | 0.0289(9)  | 0.0195(8)  | 0.0204(8)  | -0.0053(6)  | 0.0007(7)  | -0.0055(7)  |
| C(b3)_3  | 0.0386(10) | 0.0215(8)  | 0.0212(9)  | -0.0043(7)  | 0.0038(7)  | -0.0060(7)  |
| C(b4)_3  | 0.031(2)   | 0.028(2)   | 0.0188(17) | -0.0090(14) | 0.0019(18) | -0.0109(18) |
| C(a4)_3  | 0.041(3)   | 0.0245(19) | 0.0187(18) | -0.0067(14) | 0.001(2)   | -0.007(2)   |
| C(41)_3  | 0.069(3)   | 0.0230(18) | 0.0085(13) | -0.0073(12) | 0.0120(15) | -0.0164(19) |
| C(42)_3  | 0.072(4)   | 0.049(3)   | 0.030(2)   | -0.0197(19) | 0.031(2)   | -0.001(2)   |
| C(8a)_3  | 0.098(12)  | 0.020(4)   | 0.031(6)   | -0.002(4)   | 0.032(7)   | -0.025(7)   |
| C(9a)_3  | 0.051(6)   | 0.020(3)   | 0.017(4)   | -0.004(3)   | 0.007(4)   | -0.004(5)   |
| C(41a)_3 | 0.109(14)  | 0.039(6)   | 0.152(16)  | 0.025(8)    | -0.076(12) | -0.037(8)   |
| C(42a)_3 | 0.103(11)  | 0.040(6)   | 0.156(19)  | -0.014(12)  | 0.039(15)  | -0.009(7)   |
| C(21)_3  | 0.0395(10) | 0.0206(8)  | 0.0287(9)  | -0.0117(7)  | 0.0007(8)  | -0.0029(7)  |
| C(22)_3  | 0.0432(12) | 0.0346(11) | 0.0440(12) | -0.0204(9)  | -0.0124(9) | -0.0020(9)  |
| C(31)_3  | 0.0393(10) | 0.0210(8)  | 0.0216(9)  | -0.0037(7)  | 0.0008(7)  | -0.0038(7)  |
| C(32)_3  | 0.0464(12) | 0.0302(10) | 0.0347(11) | -0.0025(8)  | -0.0007(9) | -0.0121(9)  |

<sup>a</sup>The estimated standard deviations of the least significant digits are given in parentheses. The anisotropic displacement factor exponent takes the form:  $-2 \pi^2 [h^2 a^{*2} U_{11} + \dots + 2 h k a^* b^* U_{12}]$ .

**Table S18.** Hydrogen Atom Coordinates and Equivalent Isotropic Displacement Parameters ( $\text{\AA}^2$ ) for  $[\text{Fe}(\text{OEP})(\text{CS})(\text{Py})]^a$

| atom     | $x$     | $y$    | $z$    | $U(\text{eq})$ |
|----------|---------|--------|--------|----------------|
| H(m1)_1  | -0.2092 | 0.7889 | 1.1207 | 0.058          |
| H(31a)_1 | -0.3010 | 0.9381 | 1.1104 | 0.041          |
| H(31b)_1 | -0.2763 | 1.0357 | 1.0771 | 0.041          |
| H(32a)_1 | -0.2151 | 0.9734 | 1.1795 | 0.058          |
| H(32b)_1 | -0.1519 | 0.8965 | 1.1535 | 0.058          |
| H(32c)_1 | -0.1276 | 0.9930 | 1.1206 | 0.058          |
| H(41a)_1 | -0.2154 | 1.1287 | 0.9840 | 0.030          |
| H(41b)_1 | -0.1788 | 1.1231 | 0.9120 | 0.030          |
| H(42a)_1 | -0.0575 | 1.1871 | 0.9410 | 0.033          |
| H(42b)_1 | -0.0465 | 1.1018 | 1.0005 | 0.033          |
| H(42c)_1 | -0.0102 | 1.0962 | 0.9292 | 0.033          |
| H(31c)_1 | -0.1468 | 1.0025 | 1.1063 | 0.045          |
| H(31d)_1 | -0.1465 | 0.8991 | 1.1329 | 0.045          |
| H(32d)_1 | -0.3083 | 0.9720 | 1.1755 | 0.063          |
| H(32e)_1 | -0.3205 | 1.0230 | 1.1030 | 0.063          |
| H(32f)_1 | -0.3203 | 0.9208 | 1.1293 | 0.063          |
| H(41c)_1 | -0.0507 | 1.0976 | 0.9363 | 0.039          |
| H(41d)_1 | -0.0973 | 1.0897 | 1.0102 | 0.039          |
| H(42d)_1 | -0.1934 | 1.2095 | 0.9393 | 0.047          |
| H(42e)_1 | -0.2114 | 1.1425 | 0.9073 | 0.047          |
| H(42f)_1 | -0.2573 | 1.1346 | 0.9802 | 0.047          |
| H(m2)_1  | -0.0828 | 1.0482 | 0.8501 | 0.064          |
| H(51a)_1 | -0.0650 | 1.1090 | 0.7393 | 0.034          |
| H(51b)_1 | -0.0441 | 1.0885 | 0.6735 | 0.034          |
| H(52a)_1 | 0.0841  | 1.1571 | 0.6792 | 0.052          |
| H(52b)_1 | 0.1062  | 1.0818 | 0.7429 | 0.052          |
| H(52c)_1 | 0.1273  | 1.0611 | 0.6762 | 0.052          |
| H(61a)_1 | 0.0205  | 0.9715 | 0.6261 | 0.036          |
| H(61b)_1 | -0.0015 | 0.8759 | 0.6419 | 0.036          |
| H(62a)_1 | 0.1690  | 0.8814 | 0.5996 | 0.055          |
| H(62b)_1 | 0.1791  | 0.9163 | 0.6558 | 0.055          |
| H(62c)_1 | 0.1570  | 0.8200 | 0.6717 | 0.055          |
| H(51c)_1 | 0.1001  | 1.0584 | 0.6997 | 0.041          |
| H(51d)_1 | 0.0572  | 1.0814 | 0.7645 | 0.041          |



**Table S18.** Continued...

| atom     | $x$     | $y$    | $z$    | $U(\text{eq})$ |
|----------|---------|--------|--------|----------------|
| H(52d)_1 | -0.0232 | 1.1808 | 0.6798 | 0.051          |
| H(52e)_1 | -0.0553 | 1.1014 | 0.6679 | 0.051          |
| H(52f)_1 | -0.0985 | 1.1245 | 0.7331 | 0.051          |
| H(61c)_1 | 0.1246  | 0.8476 | 0.6687 | 0.034          |
| H(61d)_1 | 0.1221  | 0.9487 | 0.6489 | 0.034          |
| H(62d)_1 | 0.0422  | 0.9171 | 0.5783 | 0.047          |
| H(62e)_1 | -0.0332 | 0.8706 | 0.6378 | 0.047          |
| H(62f)_1 | -0.0357 | 0.9729 | 0.6178 | 0.047          |
| H(m3)_1  | 0.0246  | 0.7392 | 0.7310 | 0.038          |
| H(m4)_1  | -0.1239 | 0.4849 | 0.9986 | 0.026          |
| H(71a)_1 | 0.0760  | 0.5058 | 0.7614 | 0.031          |
| H(71b)_1 | 0.0679  | 0.6054 | 0.7229 | 0.031          |
| H(72a)_1 | -0.0168 | 0.5366 | 0.6780 | 0.043          |
| H(72b)_1 | -0.0848 | 0.5049 | 0.7457 | 0.043          |
| H(72c)_1 | -0.0930 | 0.6054 | 0.7068 | 0.043          |
| H(81a)_1 | -0.0262 | 0.4014 | 0.9308 | 0.028          |
| H(81b)_1 | -0.0039 | 0.4076 | 0.8575 | 0.028          |
| H(82a)_1 | -0.1507 | 0.3460 | 0.9065 | 0.034          |
| H(82b)_1 | -0.1983 | 0.4302 | 0.9281 | 0.034          |
| H(82c)_1 | -0.1759 | 0.4364 | 0.8540 | 0.034          |
| H(11a)_1 | -0.2092 | 0.4497 | 1.1719 | 0.028          |
| H(11b)_1 | -0.1536 | 0.4261 | 1.1094 | 0.028          |
| H(12a)_1 | -0.3131 | 0.3856 | 1.1365 | 0.036          |
| H(12b)_1 | -0.3608 | 0.4832 | 1.1323 | 0.036          |
| H(12c)_1 | -0.3046 | 0.4593 | 1.0691 | 0.036          |
| H(21a)_1 | -0.2287 | 0.6583 | 1.2041 | 0.037          |
| H(21b)_1 | -0.2560 | 0.5655 | 1.2167 | 0.037          |
| H(22a)_1 | -0.4010 | 0.6630 | 1.2339 | 0.059          |
| H(22b)_1 | -0.3767 | 0.7241 | 1.1624 | 0.059          |
| H(22c)_1 | -0.4043 | 0.6305 | 1.1751 | 0.059          |
| H(2a)_1  | -0.3102 | 0.8097 | 0.9923 | 0.046          |
| H(3a)_1  | -0.4739 | 0.8456 | 0.9733 | 0.055          |
| H(4a)_1  | -0.5089 | 0.8488 | 0.8727 | 0.055          |
| H(5a)_1  | -0.3753 | 0.8145 | 0.7939 | 0.051          |

**Table S18.** Continued...

| atom     | $x$     | $y$    | $z$    | $U(\text{eq})$ |
|----------|---------|--------|--------|----------------|
| H(6a)_1  | -0.2138 | 0.7814 | 0.8166 | 0.043          |
| H(m1)_2  | 0.2472  | 0.8431 | 0.3677 | 0.047          |
| H(m2)_2  | 0.1821  | 0.4562 | 0.5072 | 0.028          |
| H(m3)_2  | 0.3436  | 0.3674 | 0.2486 | 0.026          |
| H(m4)_2  | 0.4132  | 0.7533 | 0.1100 | 0.039          |
| H(11a)_2 | 0.3486  | 0.9825 | 0.1138 | 0.038          |
| H(11b)_2 | 0.3666  | 0.9059 | 0.0836 | 0.038          |
| H(12a)_2 | 0.5139  | 0.9663 | 0.0616 | 0.045          |
| H(12b)_2 | 0.5117  | 0.9457 | 0.1365 | 0.045          |
| H(12c)_2 | 0.5299  | 0.8683 | 0.1059 | 0.045          |
| H(21a)_2 | 0.2324  | 0.9754 | 0.2818 | 0.040          |
| H(21b)_2 | 0.2839  | 1.0178 | 0.2112 | 0.040          |
| H(22a)_2 | 0.3671  | 1.0388 | 0.2853 | 0.049          |
| H(22b)_2 | 0.3875  | 0.9366 | 0.3175 | 0.049          |
| H(22c)_2 | 0.4394  | 0.9793 | 0.2462 | 0.049          |
| H(11c)_2 | 0.5021  | 0.8753 | 0.1113 | 0.038          |
| H(11d)_2 | 0.4654  | 0.9559 | 0.1380 | 0.038          |
| H(12d)_2 | 0.4047  | 0.9868 | 0.0424 | 0.064          |
| H(12e)_2 | 0.3538  | 0.9015 | 0.0745 | 0.064          |
| H(12f)_2 | 0.3170  | 0.9827 | 0.1013 | 0.064          |
| H(21c)_2 | 0.3910  | 0.9902 | 0.2313 | 0.028          |
| H(21d)_2 | 0.3722  | 0.9399 | 0.3053 | 0.028          |
| H(22d)_2 | 0.2428  | 1.0584 | 0.2802 | 0.037          |
| H(22e)_2 | 0.2214  | 1.0186 | 0.2297 | 0.037          |
| H(22f)_2 | 0.2025  | 0.9679 | 0.3043 | 0.037          |
| H(31a)_2 | 0.1184  | 0.7733 | 0.5331 | 0.060          |
| H(31b)_2 | 0.1554  | 0.8353 | 0.4659 | 0.060          |
| H(31c)_2 | 0.2330  | 0.8122 | 0.4835 | 0.060          |
| H(31d)_2 | 0.1721  | 0.7573 | 0.5455 | 0.060          |
| H(32a)_2 | 0.0932  | 0.8879 | 0.5108 | 0.035          |
| H(32b)_2 | 0.0963  | 0.8736 | 0.4435 | 0.035          |
| H(32c)_2 | 0.0346  | 0.8179 | 0.5067 | 0.035          |
| H(31e)_2 | 0.2148  | 0.8493 | 0.5396 | 0.057          |
| H(31f)_2 | 0.2603  | 0.7493 | 0.5600 | 0.057          |

**Table S18.** Continued...

| atom     | $x$     | $y$     | $z$     | $U(\text{eq})$ |
|----------|---------|---------|---------|----------------|
| H(31g)_2 | 0.2999  | 0.8119  | 0.4918  | 0.057          |
| H(41a)_2 | 0.0967  | 0.5419  | 0.5744  | 0.034          |
| H(41b)_2 | 0.1075  | 0.6246  | 0.5911  | 0.034          |
| H(42a)_2 | 0.1976  | 0.4999  | 0.6543  | 0.042          |
| H(42b)_2 | 0.2608  | 0.4800  | 0.5912  | 0.042          |
| H(42c)_2 | 0.2717  | 0.5637  | 0.6080  | 0.042          |
| H(51a)_2 | 0.2212  | 0.3045  | 0.5303  | 0.037          |
| H(51b)_2 | 0.2265  | 0.2306  | 0.4992  | 0.037          |
| H(52a)_2 | 0.0654  | 0.2574  | 0.5551  | 0.061          |
| H(52b)_2 | 0.0561  | 0.3563  | 0.5120  | 0.061          |
| H(52c)_2 | 0.0614  | 0.2816  | 0.4807  | 0.061          |
| H(61a)_2 | 0.2931  | 0.1974  | 0.4037  | 0.033          |
| H(61b)_2 | 0.3516  | 0.2374  | 0.3349  | 0.033          |
| H(62a)_2 | 0.2249  | 0.1700  | 0.3256  | 0.054          |
| H(62b)_2 | 0.1453  | 0.2311  | 0.3600  | 0.054          |
| H(62c)_2 | 0.2044  | 0.2716  | 0.2905  | 0.054          |
| H(71a)_2 | 0.4485  | 0.3705  | 0.1546  | 0.031          |
| H(71b)_2 | 0.4913  | 0.4323  | 0.0880  | 0.031          |
| H(72a)_2 | 0.3708  | 0.3627  | 0.0737  | 0.033          |
| H(72b)_2 | 0.2910  | 0.4021  | 0.1229  | 0.033          |
| H(72c)_2 | 0.3342  | 0.4645  | 0.0556  | 0.033          |
| H(81a)_2 | 0.5092  | 0.5780  | 0.0326  | 0.038          |
| H(81b)_2 | 0.5126  | 0.6637  | 0.0478  | 0.038          |
| H(82a)_2 | 0.4293  | 0.6984  | -0.0401 | 0.043          |
| H(82b)_2 | 0.3516  | 0.6361  | 0.0028  | 0.043          |
| H(82c)_2 | 0.3550  | 0.7228  | 0.0181  | 0.043          |
| H(2a)_2  | 0.1851  | 0.7048  | 0.1927  | 0.036          |
| H(3a)_2  | 0.0256  | 0.7528  | 0.1670  | 0.046          |
| H(4a)_2  | -0.1132 | 0.7196  | 0.2489  | 0.047          |
| H(5a)_2  | -0.0853 | 0.6380  | 0.3562  | 0.043          |
| H(6a)_2  | 0.0779  | 0.5924  | 0.3767  | 0.034          |
| H(2a)_3  | 0.3945  | -0.0164 | 0.4036  | 0.036          |
| H(3a)_3  | 0.2315  | 0.0072  | 0.3858  | 0.042          |
| H(4a)_3  | 0.1023  | 0.0529  | 0.4592  | 0.041          |

**Table S18.** Continued...

| atom     | <i>x</i> | <i>y</i> | <i>z</i> | <i>U</i> (eq) |
|----------|----------|----------|----------|---------------|
| H(5a)_3  | 0.1360   | 0.0750   | 0.5504   | 0.038         |
| H(6a)_3  | 0.2990   | 0.0514   | 0.5682   | 0.035         |
| H(12y)_3 | 0.4175   | 0.0209   | 0.6985   | 0.040         |
| H(11a)_3 | 0.4369   | 0.2521   | 0.6728   | 0.037         |
| H(11b)_3 | 0.4405   | 0.1520   | 0.7093   | 0.037         |
| H(12a)_3 | 0.2850   | 0.2261   | 0.7405   | 0.053         |
| H(12b)_3 | 0.2689   | 0.2626   | 0.6677   | 0.053         |
| H(12c)_3 | 0.2725   | 0.1616   | 0.7044   | 0.053         |
| H(12z)_3 | 0.3459   | 0.0313   | 0.6879   | 0.040         |
| H(11c)_3 | 0.2746   | 0.1792   | 0.6836   | 0.034         |
| H(11d)_3 | 0.3047   | 0.2729   | 0.6537   | 0.034         |
| H(12d)_3 | 0.3543   | 0.2059   | 0.7564   | 0.062         |
| H(12e)_3 | 0.4168   | 0.1280   | 0.7314   | 0.062         |
| H(12f)_3 | 0.4471   | 0.2226   | 0.7012   | 0.062         |
| H(m1)_3  | 0.5017   | 0.2838   | 0.4226   | 0.027         |
| H(41a)_3 | 0.5966   | 0.2040   | 0.2033   | 0.041         |
| H(41b)_3 | 0.5944   | 0.1039   | 0.2208   | 0.041         |
| H(42a)_3 | 0.7594   | 0.1332   | 0.1688   | 0.067         |
| H(42b)_3 | 0.7668   | 0.1737   | 0.2227   | 0.067         |
| H(42c)_3 | 0.7645   | 0.0724   | 0.2404   | 0.067         |
| H(41c)_3 | 0.7556   | 0.0850   | 0.2323   | 0.121         |
| H(41d)_3 | 0.7417   | 0.1888   | 0.2107   | 0.121         |
| H(42d)_3 | 0.6580   | 0.1464   | 0.1678   | 0.137         |
| H(42e)_3 | 0.5977   | 0.0947   | 0.2335   | 0.137         |
| H(42f)_3 | 0.5839   | 0.1980   | 0.2121   | 0.137         |
| H(21a)_3 | 0.4024   | 0.3597   | 0.5655   | 0.036         |
| H(22b)_3 | 0.4135   | 0.3652   | 0.4928   | 0.036         |
| H(22a)_3 | 0.5438   | 0.4238   | 0.5069   | 0.046         |
| H(22b)_3 | 0.5769   | 0.3342   | 0.5579   | 0.046         |
| H(22c)_3 | 0.5882   | 0.3398   | 0.4844   | 0.046         |
| H(31a)_3 | 0.5185   | 0.3417   | 0.3117   | 0.035         |
| H(31b)_3 | 0.5707   | 0.3197   | 0.2481   | 0.035         |
| H(32a)_3 | 0.6703   | 0.3953   | 0.2760   | 0.047         |
| H(32b)_3 | 0.6735   | 0.3224   | 0.3434   | 0.047         |
| H(32c)_3 | 0.7263   | 0.3001   | 0.2791   | 0.047         |

<sup>a</sup>*U*(eq) is defined as one third of the trace of the orthogonalized  $\mathbf{U}_{ij}$  tensor the estimated standard deviations of the least significant digits are given in parentheses.

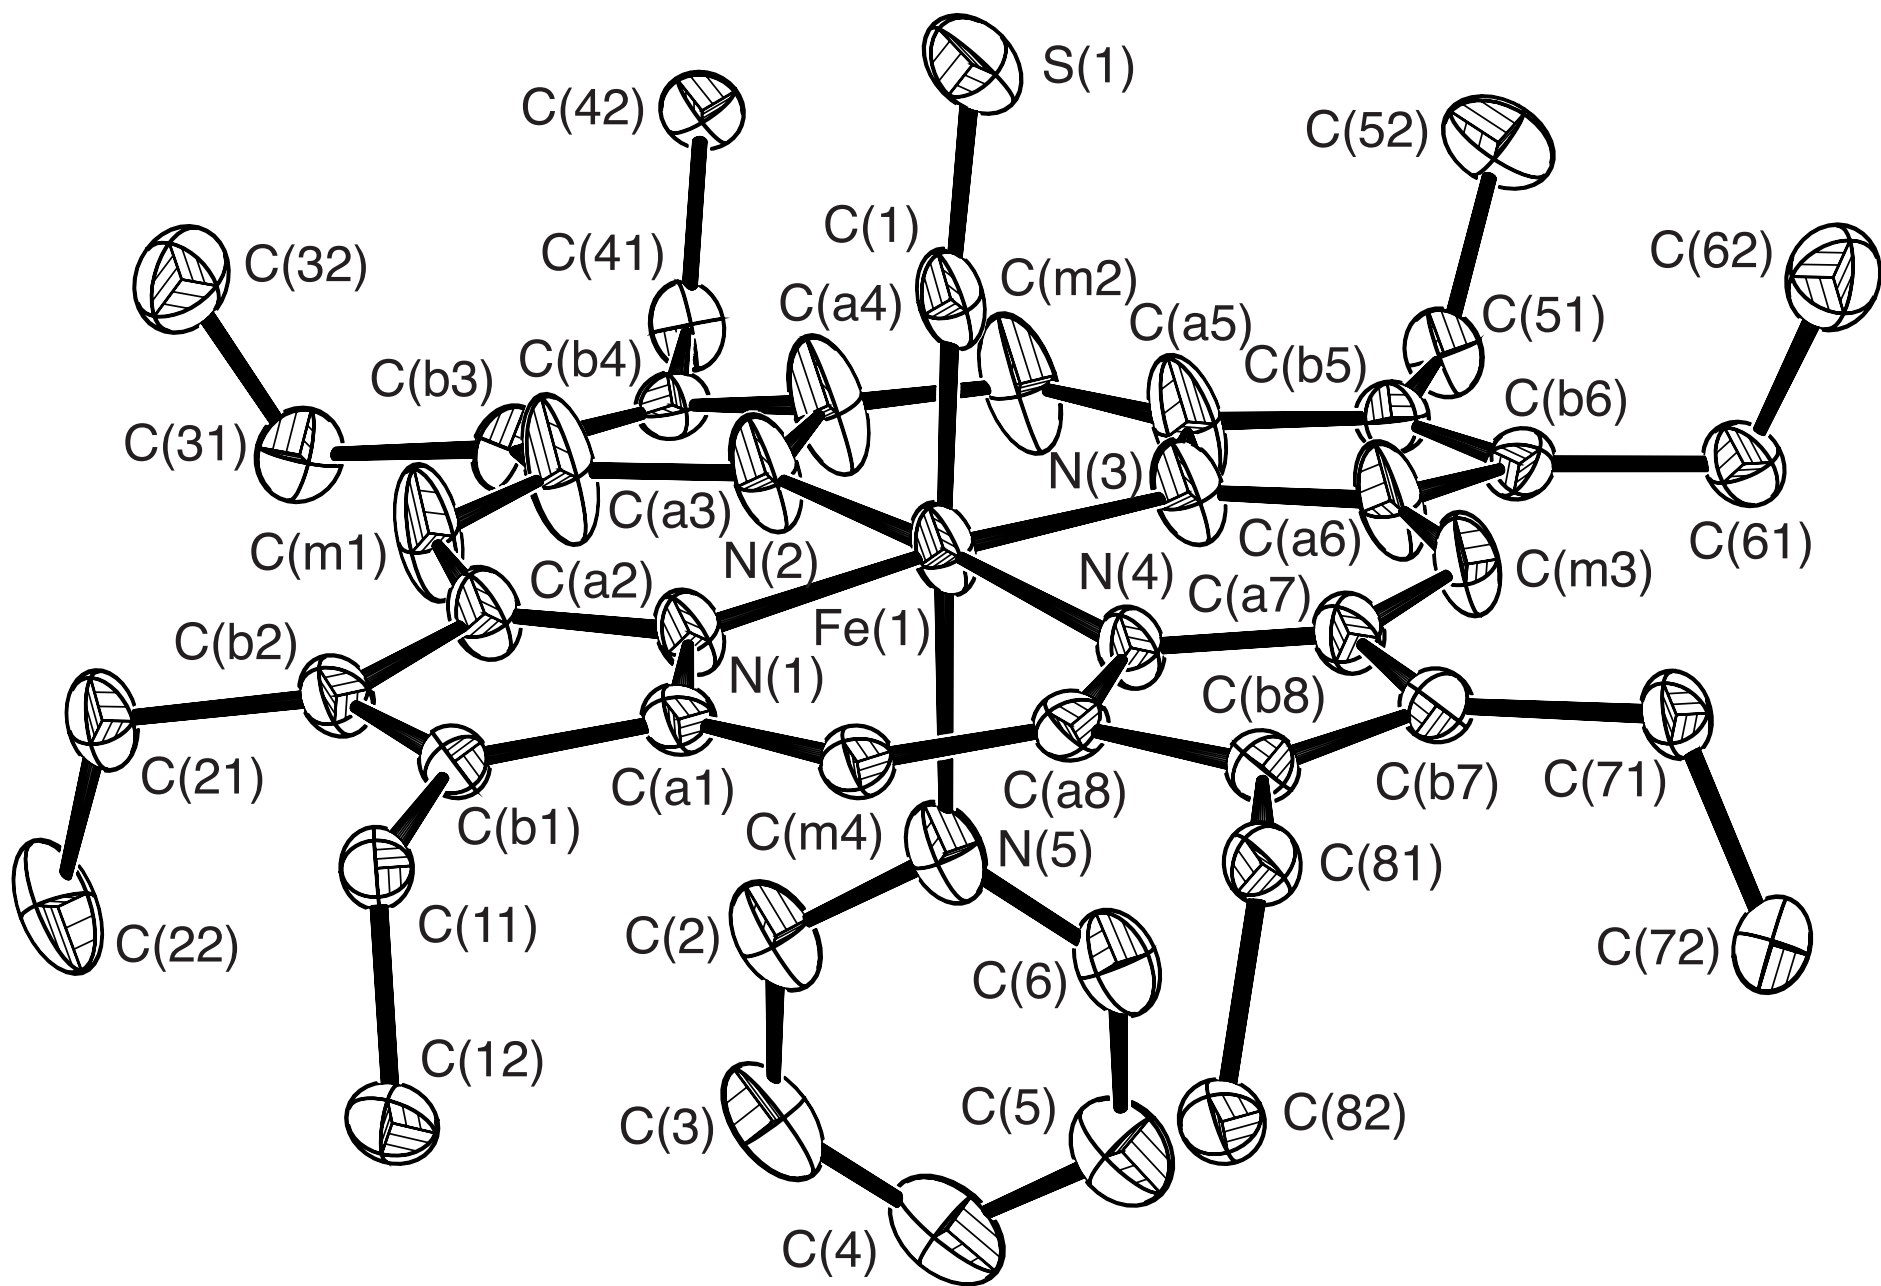

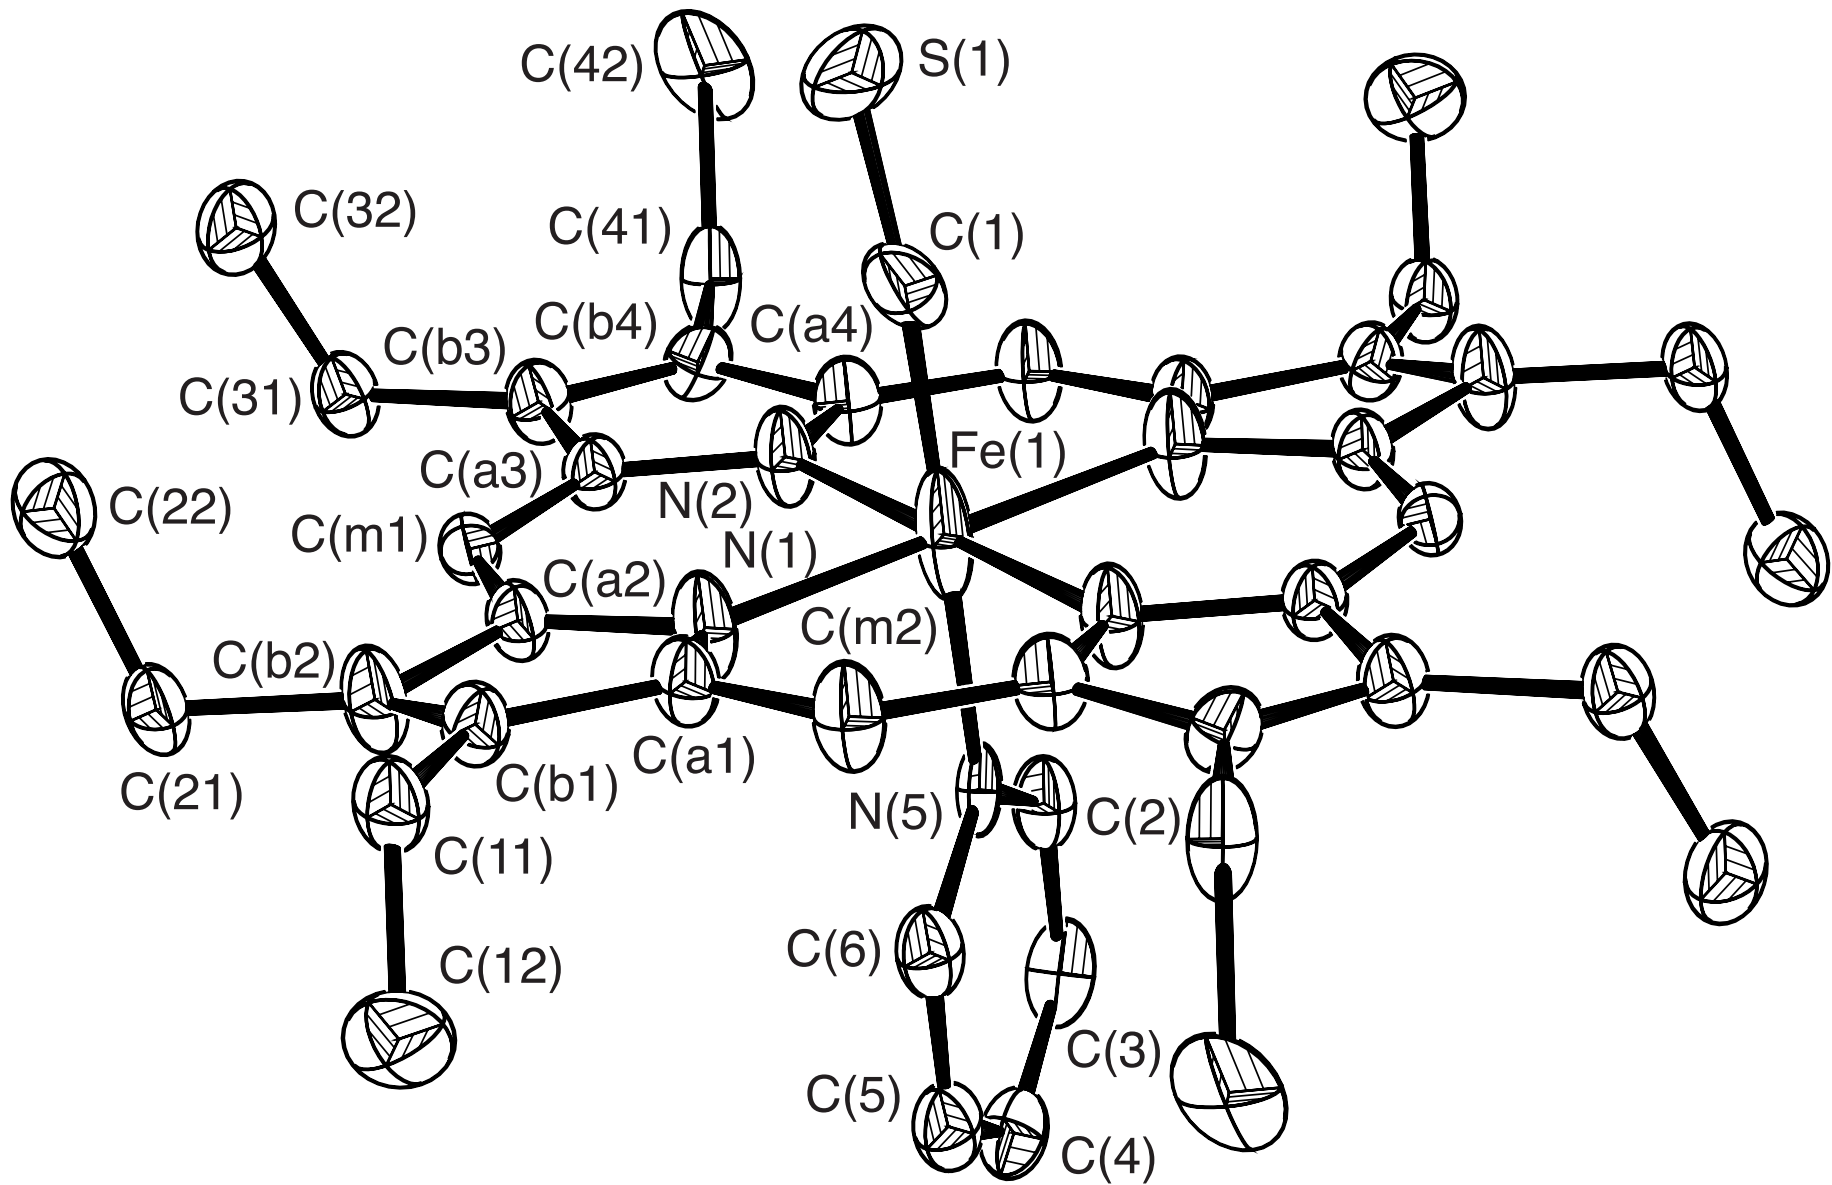

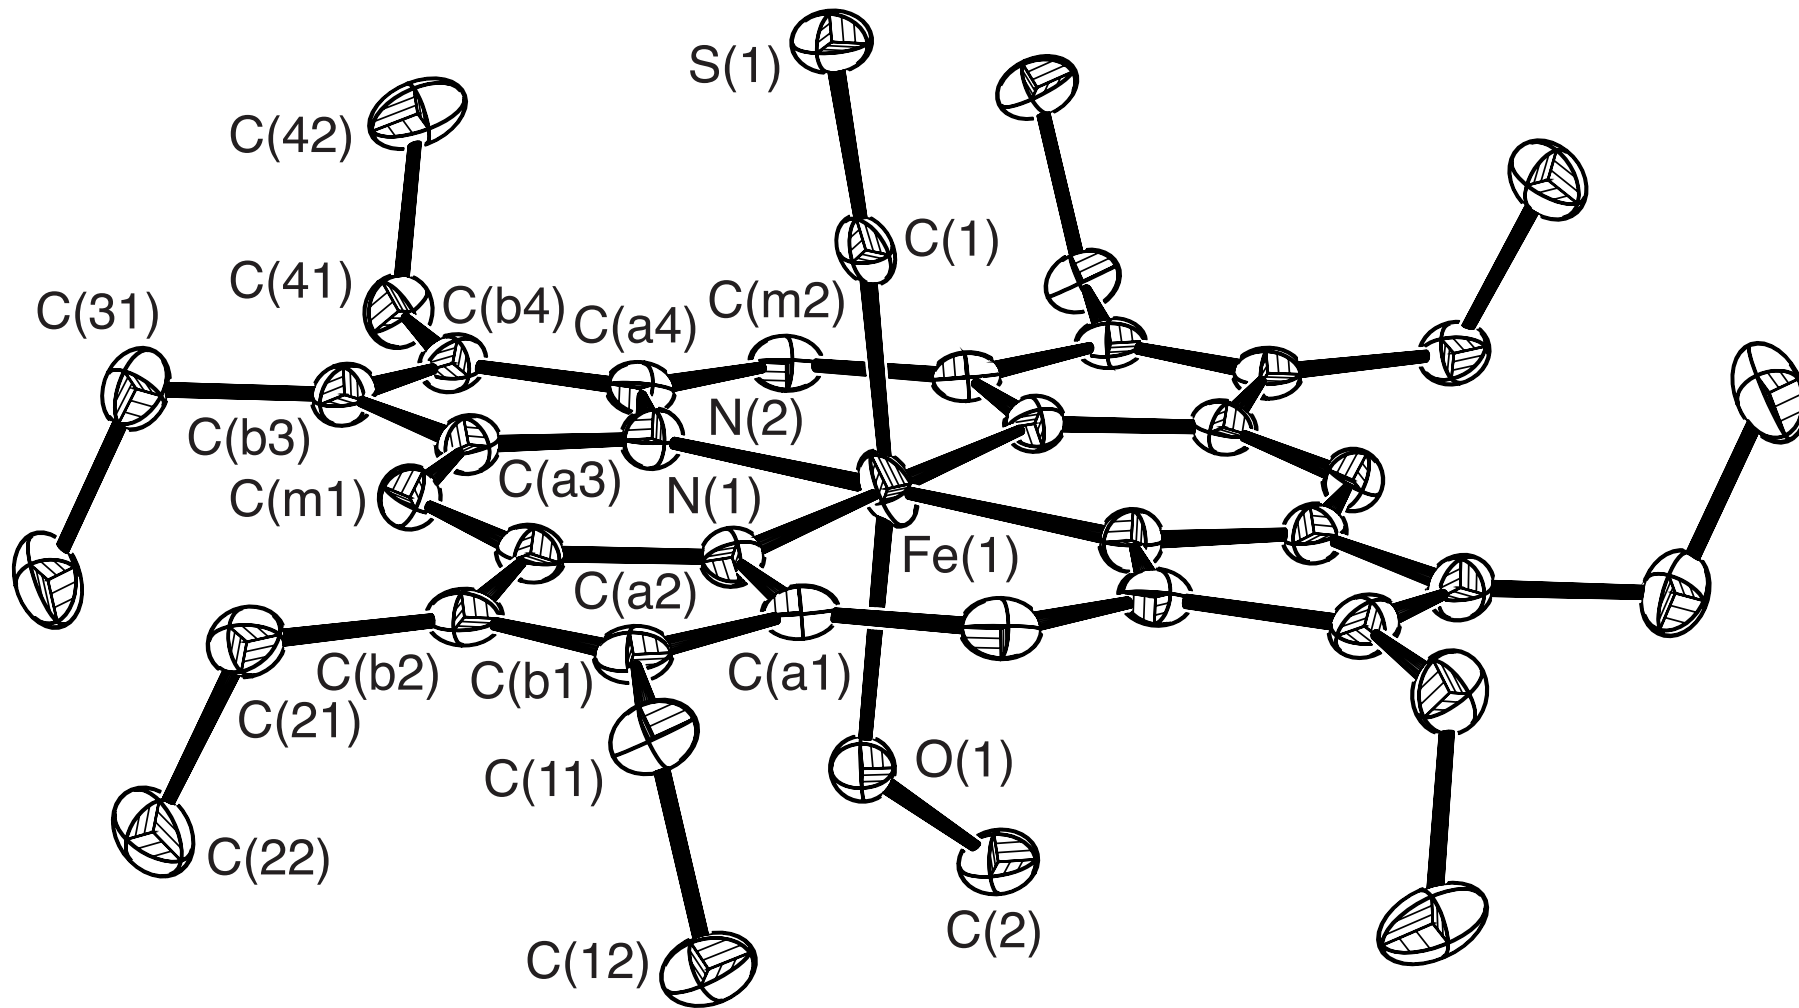

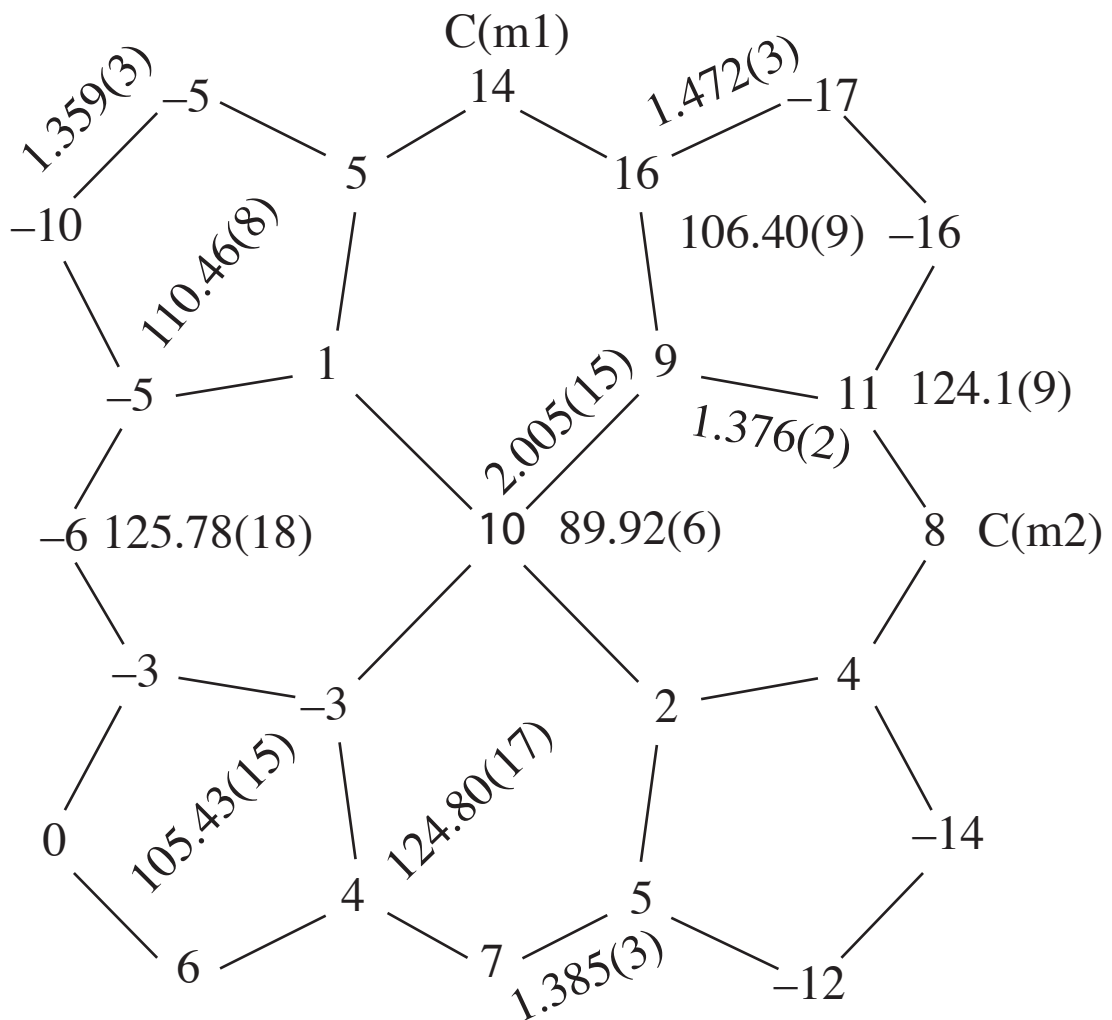

24-atom mean plane for [Fe(OEP)(CS)(Py)] - Molecule 1



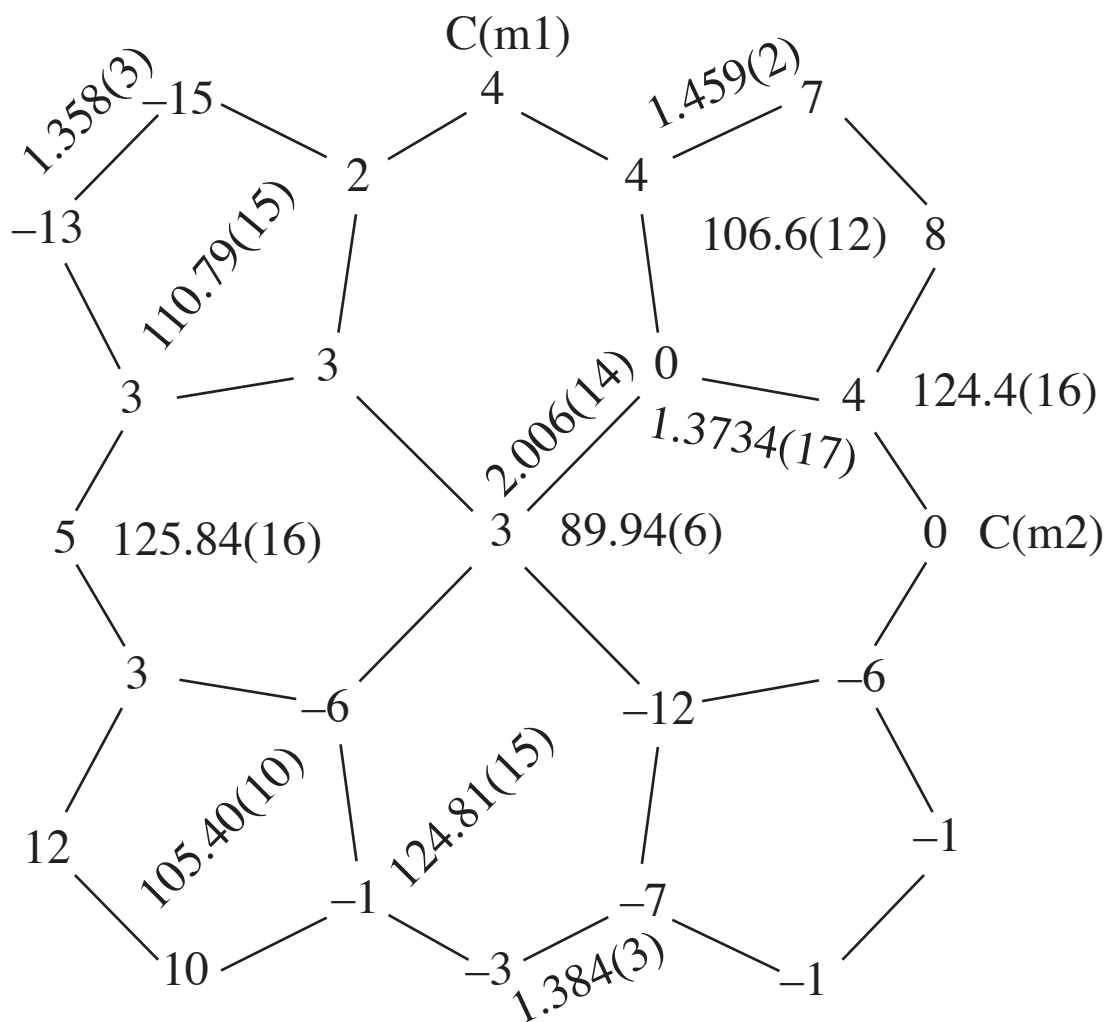

24-atom mean plane for [Fe(OEP)(CS)(Py)] - Molecule 2

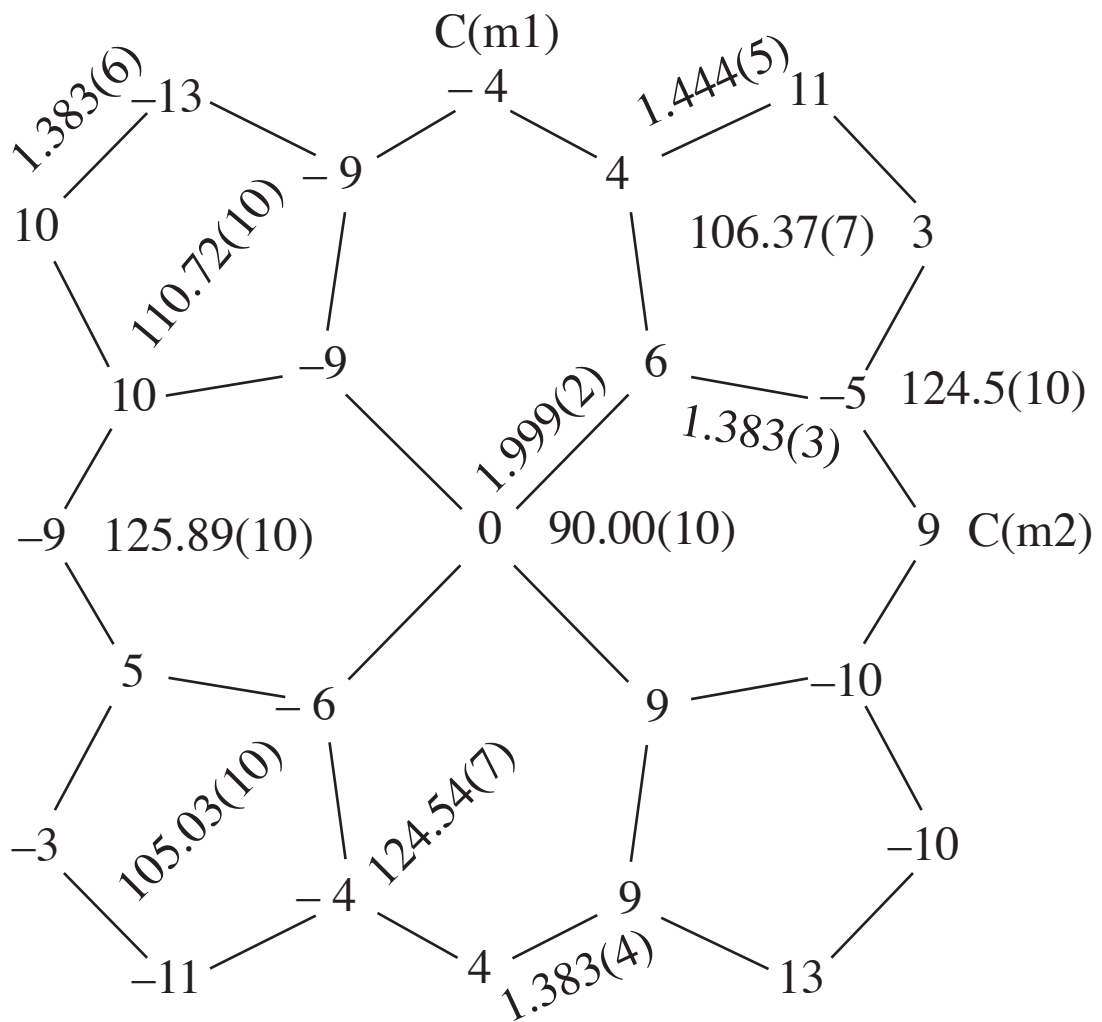

24-atom mean plane for [Fe(OEP)(CS)(Py)] - Molecule 3

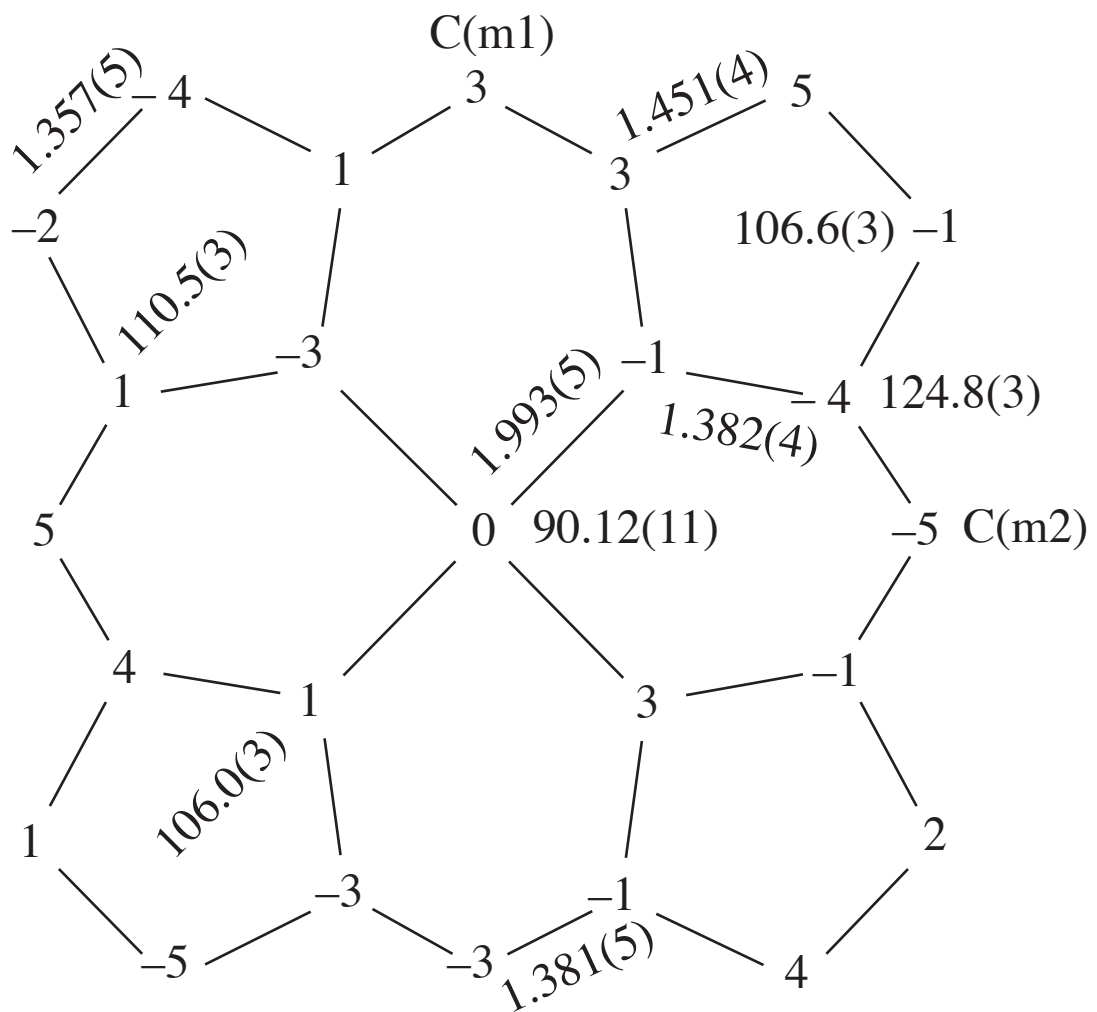

24-atom mean plane for [Fe(OEP)(CS)(CH<sub>3</sub>OH)]
